# Supplementary material for: Ecological Interactions in Dinosaur Communities: Influences of Small Offspring and Complex Ontogenetic Life Histories
Source: PLoS One. 2013 Oct 30;8(10):e77110. doi: 10.1371/journal.pone.0077110 (PMC3812983; doi:10.1371/journal.pone.0077110)
Supplement: Table S1 — Body mass estimates for Mesozoic vertebrates, modern mammals, and modern birds. (XLSX) [file pone.0077110.s001.xlsx]

## Sheet: MesozoicTaxa
Data source: see references in Codron D, Carbone C, Müller DWH, Clauss M (2012) Ontogenetic niche shifts in dinosaurs influenced size, diversity and extinction in terrestrial vertebrates. Biol Lett 8: 620-623.
Clade	Taxon	Body mass (kg)
Ornithischia	Anatosaurus annectens	3990.8
Ornithischia	Anatotitan	7594.4
Ornithischia	Ankylosaurus magniventris	1719.2
Ornithischia	Bactrosaurus johnsoni	1588.9
Ornithischia	Camptosaurus prestwichii	268.4
Ornithischia	Centrosaurus	1079.7
Ornithischia	Chasmosaurus	1658.7
Ornithischia	Corythosaurus casuarius	3078.5
Ornithischia	Dryosaurus altus	104.3
Ornithischia	Euplocephalus tutus	2675.9
Ornithischia	Gasparinisaura cincosaltensis	0.98
Ornithischia	Heterodontosaurus	1.8
Ornithischia	Homocephale	73.7
Ornithischia	Huayangosaurus taibii	301.4
Ornithischia	Hypseloaurus priscus	9072
Ornithischia	Hypsilophodon foxii	7
Ornithischia	Iguanodon bernissartensis	377.5
Ornithischia	Iguanodon mantelli	678.4
Ornithischia	Kentrosaurus	321.1
Ornithischia	Kritosaurus incurvimanus	1895
Ornithischia	Maiasaura peelblesorum	6000
Ornithischia	Monoclonius	1833.6
Ornithischia	Muttaburrasaurus langdoni	4100.4
Ornithischia	Nodosaurus	684.8
Ornithischia	Orodromeus malekai	21
Ornithischia	Ouranosaurus nigeriensis	1120.4
Ornithischia	Parasaurolophus	5056.8
Ornithischia	Pentaceratops sternbergii	4846
Ornithischia	Pinacosaurus gangeri	707.2
Ornithischia	Probactrosaurus gobiensis	179.3
Ornithischia	Protoceratops andrewsi	125.9
Ornithischia	Psittacosaurus mongoliensis	12.1
Ornithischia	Saichania	1417.2
Ornithischia	Sauropelta edwardsi	902.9
Ornithischia	Scelidosaurus harrisonii	64.5
Ornithischia	Shatungosaurus	22467.1
Ornithischia	Stegoceras	26.7
Ornithischia	Stegosaurus stenops	2610.6
Ornithischia	Tenontosaurus	242.9
Ornithischia	Thescelosaurus	7.9
Ornithischia	Triceratops horridus	4964
Ornithischia	Tuojiangosaurus multispinus	1134.3
Ornithischia	Yandusaurus	6.6
Sauropodomorpha	Alamosaurus sanjuanensis	25000
Sauropodomorpha	Amargosaurus cazaui	6852.9
Sauropodomorpha	Amphicoelias fragillimus	150000
Sauropodomorpha	Anchisaurus sinensis	84
Sauropodomorpha	Antarctosaurus giganteus	69000
Sauropodomorpha	Antarctosaurus wichmannianus	29013.5
Sauropodomorpha	Apatosaurus	25952
Sauropodomorpha	Apatosaurus louisae	23591.7
Sauropodomorpha	Argentinosaurus huinculensis	72936
Sauropodomorpha	Barosaurus	20039.5
Sauropodomorpha	Barosaurus lentus	11957
Sauropodomorpha	Brachiosaurus altithorax	33856.3
Sauropodomorpha	Brachiosaurus brancai	44009.6
Sauropodomorpha	Camarasaurus grandis	13867
Sauropodomorpha	Camarasaurus lewisi	11652.2
Sauropodomorpha	Camarasaurus supremus	9050
Sauropodomorpha	Cetiosaurus oxoniensis	15900
Sauropodomorpha	Dicraeosaurus	4421.5
Sauropodomorpha	Dicraeosaurus hansemanni	7966.67
Sauropodomorpha	Diplodocus	10745.2
Sauropodomorpha	Diplodocus carnegii	16470.1
Sauropodomorpha	Euhelopus zdanskyi	3800
Sauropodomorpha	Haplocanthosaurus	13664.3
Sauropodomorpha	Haplocanthosaurus delfsi	21000
Sauropodomorpha	Haplocanthosaurus priscus	10500
Sauropodomorpha	Hypselosaurus priscus	5300
Sauropodomorpha	Janenschia	14029
Sauropodomorpha	Lufengosaurus huenei	1193.3
Sauropodomorpha	Magyarosaurus dacus	900
Sauropodomorpha	Mamenchisaurus hochuanensis	16434.8
Sauropodomorpha	Massospondylus	136.7
Sauropodomorpha	Omeisaurus tiafuensis	11796
Sauropodomorpha	Omeisaurus tianfunensis	9800
Sauropodomorpha	Opisthocoelicaudia skarzynskii	12494.4
Sauropodomorpha	Paralititan stromeri	59000
Sauropodomorpha	Patagosaurus	9435.4
Sauropodomorpha	Plateosaurus engelhardti	992.3
Sauropodomorpha	Riojasaurus	3038.7
Sauropodomorpha	Sauroposeidon proteles	60000
Sauropodomorpha	Seismosaurus halli	74637.8
Sauropodomorpha	Seismosaurus hallorum	42500
Sauropodomorpha	Shunosaurus lii	4146.75
Sauropodomorpha	Supersaurus vivianae	40200
Sauropodomorpha	Thecodontosaurus antiquus	24.6
Sauropodomorpha	Ultrasauros macintoshi	50000
Theropoda	Afrovenator abakensis	826.6
Theropoda	Albertosaurus libratus	2465
Theropoda	Albertosaurus sarcophagus	1146
Theropoda	Allosaurus fragilis	952
Theropoda	Alxasaurus elesitaiensis	199.9
Theropoda	Avimimus portentosus	21.4
Theropoda	Carcharodontosaurus saharicus	6173.2
Theropoda	Ceratosaurus nasicornis	418.4
Theropoda	Chirostenotes elegans	63
Theropoda	Chirostenotes pergracilis	63
Theropoda	Coelophysis bauri	16
Theropoda	Compsognathus longipes	3.5
Theropoda	Deinonychus antirrhopus	104.7
Theropoda	Deltradromeus agilis	1048.9
Theropoda	Dromaeosaurus albertensis	16
Theropoda	Eoraptor lunensis	2.7
Theropoda	Gigantosaurus carolinii	6594.8
Theropoda	Herrerasaurus ischigualastensis	347.8
Theropoda	Metriacanthosaurus shangyouensis	1225.6
Theropoda	Nanotyrannus lancensis	1100
Theropoda	Ornitholestes hermanni	13.5
Theropoda	Ornithomimus bullatus	585.7
Theropoda	Ornithomimus velox	155
Theropoda	Richardoestesia gilmorei	20
Theropoda	Richardoestesia isosceles	20
Theropoda	Saurornitholestes langstoni	23
Theropoda	Sinornithoides youngi	2.2
Theropoda	Sinraptor dongi	1009
Theropoda	Struthiomimus sp.	175
Theropoda	Suchomimus tenerensis	3816.1
Theropoda	Syntarsus rhodesiensis	13.8
Theropoda	Troodon formosus	50
Theropoda	Tyrannosaurus rex	5998.95
Theropoda	Velociraptor antirrhopus	44.3
Theropoda	Velociraptor sp.	24
Mammal	Alostera saskatchewanensis	0.0948641
Mammal	Anchistodelphys archibaldi	0.0118469
Mammal	Anchistodelphys delicatus	0.0168219
Mammal	Arundelconodon hottoni	0.084351
Mammal	Astroconodon denisoni	0.0258631
Mammal	Avitotherium utahensis	0.0640136
Mammal	Batodon tenuis	0.0104729
Mammal	Cimolestes incisus	0.370619
Mammal	Cimolestes magnus	1.43726
Mammal	Gallolestes pachymandibularis	0.126815
Mammal	Gobiconodon ostromi	0.544758
Mammal	Gypsonictops illuminatus	0.165657
Mammal	Gypsonictops lewisi	0.0960976
Mammal	Iugomortiferum thoringtoni	0.042563
Mammal	Paranyctoides maleficus	0.0279286
Mammal	Paranyctoides megakeros	0.179992
Mammal	Paranyctoides sternbergi	0.0261678
Mammal	Pariadens kirklandi	0.12225
Mammal	Spalacolestes cretulablatta	0.00996204
Mammal	Spalacotheridium noblei	0.00674791
Mammal	Symmetrodontoides canadensis	0.025583
Mammal	Symmetrodontoides foxi	0.0194934
Mammal	Aletridelphys clemensi	0.0594151
Mammal	Alphadon attaragos	0.0256733
Mammal	Alphadon clemensi	0.025854
Mammal	Alphadon eatoni	0.024383
Mammal	Alphadon halleyi	0.0394692
Mammal	Alphadon jasoni	0.0607746
Mammal	Alphadon lillegraveni	0.0843464
Mammal	Alphadon marshi	0.0900961
Mammal	Alphadon perexiguus	0.0188231
Mammal	Alphadon sahnii	0.0638519
Mammal	Alphadon wilsoni	0.0364484
Mammal	Aquiladelphis minor	0.173704
Mammal	Didelphodon vorax	1.05088
Mammal	Glasbius twitchelli	0.0758061
Mammal	Leptalestes krejcii	0.0248612
Mammal	Leptalestes prokrejcii	0.0232951
Mammal	Pediomys elegans	0.0498199
Mammal	Turgidodon madseni	0.0642085
Mammal	Turgidodon petiminis	0.250162
Mammal	Turgidodon russelli	0.0973128
Mammal	Varalphadon wahweapensis	0.0267799
Mammal	Bryceomys fumosus	0.0263737
Mammal	Bryceomys hadrosus	0.152462
Mammal	Bryceomys intermedius	0.0501289
Mammal	Bubodens magnus	16.7211
Mammal	Cedaromys bestia	0.13681
Mammal	Cedaromys parvus	0.079189
Mammal	Cimexomys antiquus	0.0580115
Mammal	Cimexomys minor	0.0554393
Mammal	Cimolodon electus	0.310484
Mammal	Cimolodon nitidus	0.359425
Mammal	Cimolodon similis	0.213693
Mammal	Cimolomys clarki	0.472342
Mammal	Cimolomys gracilis	0.609189
Mammal	Dakotamys malcolmi	0.0493877
Mammal	Essonodon browni	3.13299
Mammal	Janumys erebos	0.0133214
Mammal	Meniscoessus collomensis	1.84859
Mammal	Meniscoessus intermedius	0.721368
Mammal	Meniscoessus major	1.41996
Mammal	Meniscoessus robustus	3.82834
Mammal	Meniscoessus seminoensis	4.06513
Mammal	Mesodma formosa	0.0603525
Mammal	Mesodma garfieldensis	0.0730554
Mammal	Mesodma hensleighi	0.0304117
Mammal	Mesodma senecta	0.0948883
Mammal	Mesodma thompsoni	0.0989945
Mammal	Paracimexomys judithae	0.0431918
Mammal	Paracimexomys magister	0.164063
Mammal	Paracimexomys perplexus	0.0302159
Mammal	Paracimexomys priscus	0.106094
Mammal	Paracimexomys robisoni	0.0470424
Mammal	Parectypodus foxi	0.146107
Mammal	Parikimys carpenteri	0.0802312
Mammal	Schowalteria clemensi	1.09699
Mammal	Repenomamus giganticus	12
Mammal	Repenomamus robustus	4.13
Mammal	Dakotadens morrowi	0.139252
Bird	Apsaravis ukhaana	0.295073
Bird	Archaeoptervx	0.326031
Bird	Cathayornis caudatus	0.0157717
Bird	Cathayornis yandica	0.0139998
Bird	Changchengornis hengdaoziensis	0.0536287
Bird	Concornis lacustrus	0.0188561
Bird	Confuciusornis dui	0.0608114
Bird	Confuciusornis sanctus	0.167997
Bird	Cuspirostrisornis houi	0.0258203
Bird	Gobipteryx minuta	0.0693477
Bird	Iberomesornis romerali	0.00418347
Bird	Ichthyornis dispar	0.251402
Bird	Jeholornis prima	1
Bird	Jibeinia luanhera	0.0123371
Bird	Largirostrornis sexdentornis	0.0301081
Bird	Liaoningornis longidigitris	0.0213948
Bird	Longchengornis sanyaensis	0.0110032
Bird	Longipteryx chaoyangensis	0.0282638
Bird	Longirostrornis hani	0.00849854
Bird	Neuquenornis volans	0.349034
Bird	Patagopteryx deferrariisi	2.52528
Bird	Protopteryx fengningensis	1.32323
Bird	Rahonavis ostromi	1.62721
Bird	Sapeornis chaoyangensis	1.00362
Bird	Shenzhouraptor sinensis	0.323317
Bird	Sinornis santensis	0.0101163
Bird	Songlingornis linghensis	0.00190477
Bird	Vescornis hebeiensis	0.0119447
Bird	Vorona berivotrensis	2.19788
Bird	Yanornis martini	0.295073
Bird	Yixianornis grabaui	0.110345

## Sheet: ModernMammals
Data source: Smith FA, Lyons K, Morgan Ernest SK, Jones KE, Kaufman DM, et al. (2003) Body mass of Late Quaternary mammals. Ecology 84: 3403 (Ecological Archives: E3084-3094).
Species	Order	Trophic niche	Status	Body mass (kg)
Addax nasomaculatus	Artiodactyla	Herbivore	extant	70.0003
Aepyceros melampus	Artiodactyla	Herbivore	extant	52.5001
Alcelaphus buselaphus	Artiodactyla	Herbivore	extant	171.001
Alces alces	Artiodactyla	Herbivore	extant	356.998
Ammodorcas clarkei	Artiodactyla	Herbivore	extant	28.0498
Ammotragus lervia	Artiodactyla	Herbivore	extant	48
Antidorcas marsupialis	Artiodactyla	Herbivore	extant	39.0499
Antilocapra americana	Artiodactyla	Herbivore	extant	46.0829
Antilope cervicapra	Artiodactyla	Herbivore	extant	37.5
Axis axis	Artiodactyla	Herbivore	extant	67.2819
Axis calamianensis	Artiodactyla	Herbivore	extant	40.5
Axis kuhlii	Artiodactyla	Herbivore	extant	55
Axis porcinus	Artiodactyla	Herbivore	extant	34.4185
Babyrousa babyrussa	Artiodactyla	Herbivore	extant	100
Bison bison	Artiodactyla	Herbivore	extant	579.255
Bison bonasus	Artiodactyla	Herbivore	extant	500
Blastocerus dichotomus	Artiodactyla	Herbivore	extant	86.6662
Bos frontalis	Artiodactyla	Herbivore	extant	800
Bos grunniens	Artiodactyla	Herbivore	extant	416.5
Bos javanicus	Artiodactyla	Herbivore	extant	625
Bos sauveli	Artiodactyla	Herbivore	extant	800
Bos taurus	Artiodactyla	Herbivore	extant	900
Boselaphus tragocamelus	Artiodactyla	Herbivore	extant	169
Bubalus bubalis	Artiodactyla	Herbivore	extant	431.25
Bubalus depressicornis	Artiodactyla	Herbivore	extant	300
Bubalus mindorensis	Artiodactyla	Herbivore	extant	233.333
Bubalus quarlesi	Artiodactyla	Herbivore	extant	150
Budorcas taxicolor	Artiodactyla	Herbivore	extant	302
Camelus bactrianus	Artiodactyla	Herbivore	extant	690
Camelus dromedarius	Artiodactyla	Herbivore	extant	601
Capra caucasica	Artiodactyla	Herbivore	extant	55
Capra cylindricornis	Artiodactyla	Herbivore	extant	50
Capra falconeri	Artiodactyla	Herbivore	extant	41
Capra hircus	Artiodactyla	Herbivore	extant	54.25
Capra ibex	Artiodactyla	Herbivore	extant	85.1665
Capra nubiana	Artiodactyla	Herbivore	extant	62.6248
Capra pyrenaica	Artiodactyla	Herbivore	extant	50
Capra sibirica	Artiodactyla	Herbivore	extant	130
Capra walie	Artiodactyla	Herbivore	extant	100
Capreolus capreolus	Artiodactyla	Herbivore	extant	22.5
Catagonus wagneri	Artiodactyla	Herbivore	extant	35.5664
Cephalophus adersi	Artiodactyla	Herbivore	extant	9.25
Cephalophus callipygus	Artiodactyla	Herbivore	extant	18.2499
Cephalophus dorsalis	Artiodactyla	Herbivore	extant	20
Cephalophus harveyi	Artiodactyla	Herbivore	extant	14.5001
Cephalophus jentinki	Artiodactyla	Herbivore	extant	70.0003
Cephalophus leucogaster	Artiodactyla	Herbivore	extant	12.6999
Cephalophus maxwellii	Artiodactyla	Herbivore	extant	12
Cephalophus monticola	Artiodactyla	Herbivore	extant	6.25
Cephalophus natalensis	Artiodactyla	Herbivore	extant	12
Cephalophus niger	Artiodactyla	Herbivore	extant	20.4
Cephalophus nigrifrons	Artiodactyla	Herbivore	extant	13.8998
Cephalophus ogilbyi	Artiodactyla	Herbivore	extant	20
Cephalophus rubidus	Artiodactyla	Herbivore	extant	15
Cephalophus rufilatus	Artiodactyla	Herbivore	extant	12
Cephalophus silvicultor	Artiodactyla	Herbivore	extant	72.5003
Cephalophus spadix	Artiodactyla	Herbivore	extant	56.0003
Cephalophus zebra	Artiodactyla	Herbivore	extant	17.5001
Cervus albirostris	Artiodactyla	Herbivore	extant	125
Cervus duvaucelii	Artiodactyla	Herbivore	extant	143
Cervus elaphus	Artiodactyla	Herbivore	extant	165.016
Cervus eldii	Artiodactyla	Herbivore	extant	73
Cervus mariannus	Artiodactyla	Herbivore	extant	50
Cervus nippon	Artiodactyla	Herbivore	extant	53
Cervus timorensis	Artiodactyla	Herbivore	extant	63
Cervus unicolor	Artiodactyla	Herbivore	extant	177.508
Connochaetes gnou	Artiodactyla	Herbivore	extant	179.999
Connochaetes taurinus	Artiodactyla	Herbivore	extant	179.999
Dama dama	Artiodactyla	Herbivore	extant	52.375
Damaliscus hunteri	Artiodactyla	Herbivore	extant	80
Damaliscus lunatus	Artiodactyla	Herbivore	extant	136
Damaliscus pygargus	Artiodactyla	Herbivore	extant	102
Dorcatragus megalotis	Artiodactyla	Herbivore	extant	10.2499
Elaphodus cephalophus	Artiodactyla	Herbivore	extant	33.5
Elaphurus davidianus	Artiodactyla	Herbivore	extant	149
Gazella arabica	Artiodactyla	Herbivore	extant	12
Gazella bennettii	Artiodactyla	Herbivore	extant	18.9167
Gazella bilkis	Artiodactyla	Herbivore	extant	48.5
Gazella cuvieri	Artiodactyla	Herbivore	extant	25
Gazella dama	Artiodactyla	Herbivore	extant	72.9995
Gazella dorcas	Artiodactyla	Herbivore	extant	23.0001
Gazella gazella	Artiodactyla	Herbivore	extant	22.7499
Gazella granti	Artiodactyla	Herbivore	extant	54.9997
Gazella leptoceros	Artiodactyla	Herbivore	extant	22.2
Gazella rufifrons	Artiodactyla	Herbivore	extant	26.9998
Gazella rufina	Artiodactyla	Herbivore	extant	40
Gazella saudiya	Artiodactyla	Herbivore	extant	16
Gazella soemmerringii	Artiodactyla	Herbivore	extant	40
Gazella spekei	Artiodactyla	Herbivore	extant	20
Gazella subgutturosa	Artiodactyla	Herbivore	extant	28.5
Gazella thomsonii	Artiodactyla	Herbivore	extant	20.4998
Giraffa camelopardalis	Artiodactyla	Herbivore	extant	899.995
Hemitragus hylocrius	Artiodactyla	Herbivore	extant	75
Hemitragus jayakari	Artiodactyla	Herbivore	extant	23
Hemitragus jemlahicus	Artiodactyla	Herbivore	extant	35.2
Hexaprotodon liberiensis	Artiodactyla	Herbivore	extant	235.001
Hippocamelus antisensis	Artiodactyla	Herbivore	extant	68.5993
Hippocamelus bisulcus	Artiodactyla	Herbivore	extant	70.0003
Hippopotamus amphibius	Artiodactyla	Herbivore	extant	1417.49
Hippotragus equinus	Artiodactyla	Herbivore	extant	269.998
Hippotragus leucophaeus	Artiodactyla	Herbivore	extant	150
Hippotragus niger	Artiodactyla	Herbivore	extant	227.499
Hydropotes inermis	Artiodactyla	Herbivore	extant	14
Hyemoschus aquaticus	Artiodactyla	Herbivore	extant	10.85
Hylochoerus meinertzhageni	Artiodactyla	Herbivore	extant	188.5
Kobus ellipsiprymnus	Artiodactyla	Herbivore	extant	210
Kobus kob	Artiodactyla	Herbivore	extant	78.5001
Kobus leche	Artiodactyla	Herbivore	extant	110.749
Kobus megaceros	Artiodactyla	Herbivore	extant	87.5004
Kobus vardonii	Artiodactyla	Herbivore	extant	71.5007
Lama glama	Artiodactyla	Herbivore	extant	142.5
Lama guanicoe	Artiodactyla	Herbivore	extant	120
Lama pacos	Artiodactyla	Herbivore	extant	60
Litocranius walleri	Artiodactyla	Herbivore	extant	37.9997
Madoqua guentheri	Artiodactyla	Herbivore	extant	7.5
Madoqua kirkii	Artiodactyla	Herbivore	extant	5.3001
Madoqua piacentinii	Artiodactyla	Herbivore	extant	2.5
Madoqua saltiana	Artiodactyla	Herbivore	extant	3.25
Mazama americana	Artiodactyla	Herbivore	extant	22.7997
Mazama bricenii	Artiodactyla	Herbivore	extant	16.4999
Mazama chunyi	Artiodactyla	Herbivore	extant	16.4999
Mazama gouazoupira	Artiodactyla	Herbivore	extant	16.3001
Mazama nana	Artiodactyla	Herbivore	extant	16.4999
Mazama rufina	Artiodactyla	Herbivore	extant	25.9998
Moschiola meminna	Artiodactyla	Herbivore	extant	2.93815
Moschus chrysogaster	Artiodactyla	Herbivore	extant	14.5
Moschus moschiferus	Artiodactyla	Herbivore	extant	13
Muntiacus atherodes	Artiodactyla	Herbivore	extant	15.6
Muntiacus feae	Artiodactyla	Herbivore	extant	22
Muntiacus muntjak	Artiodactyla	Herbivore	extant	15.9258
Muntiacus reevesi	Artiodactyla	Herbivore	extant	13.5
Naemorhedus caudatus	Artiodactyla	Herbivore	extant	27
Naemorhedus goral	Artiodactyla	Herbivore	extant	28.5
Naemorhedus sumatraensis	Artiodactyla	Herbivore	extant	87.5
Neotragus batesi	Artiodactyla	Herbivore	extant	3
Neotragus moschatus	Artiodactyla	Herbivore	extant	6.4999
Neotragus pygmaeus	Artiodactyla	Herbivore	extant	4
Odocoileus hemionus	Artiodactyla	Herbivore	extant	54.2126
Odocoileus virginianus	Artiodactyla	Herbivore	extant	55.5086
Okapia johnstoni	Artiodactyla	Herbivore	extant	230.001
Oreamnos americanus	Artiodactyla	Herbivore	extant	72.5003
Oreotragus oreotragus	Artiodactyla	Herbivore	extant	12.9999
Oryx dammah	Artiodactyla	Herbivore	extant	200
Oryx gazella	Artiodactyla	Herbivore	extant	169.001
Oryx leucoryx	Artiodactyla	Herbivore	extant	87.7
Ourebia ourebi	Artiodactyla	Herbivore	extant	17.25
Ovibos moschatus	Artiodactyla	Herbivore	extant	340.501
Ovis ammon	Artiodactyla	Herbivore	extant	180
Ovis aries	Artiodactyla	Herbivore	extant	50
Ovis canadensis	Artiodactyla	Herbivore	extant	74.6449
Ovis dalli	Artiodactyla	Herbivore	extant	55.6506
Ovis nivicola	Artiodactyla	Herbivore	extant	90
Ovis vignei	Artiodactyla	Herbivore	extant	60
Ozotoceros bezoarticus	Artiodactyla	Herbivore	extant	40
Pantholops hodgsonii	Artiodactyla	Herbivore	extant	27.5
Pecari tajacu	Artiodactyla	Herbivore	extant	21.2667
Pelea capreolus	Artiodactyla	Herbivore	extant	20
Phacochoerus aethiopicus	Artiodactyla	Herbivore	extant	71.0003
Phacochoerus africanus	Artiodactyla	Herbivore	extant	82.5
Potamochoerus larvatus	Artiodactyla	Herbivore	extant	48.7812
Potamochoerus porcus	Artiodactyla	Herbivore	extant	70.0003
Procapra gutturosa	Artiodactyla	Herbivore	extant	27.75
Procapra picticaudata	Artiodactyla	Herbivore	extant	20
Procapra przewalskii	Artiodactyla	Herbivore	extant	27.5
Pseudois nayaur	Artiodactyla	Herbivore	extant	45
Pseudois schaeferi	Artiodactyla	Herbivore	extant	29.25
Pudu mephistophiles	Artiodactyla	Herbivore	extant	9.6
Pudu puda	Artiodactyla	Herbivore	extant	9.7499
Rangifer tarandus	Artiodactyla	Herbivore	extant	86.034
Raphicerus campestris	Artiodactyla	Herbivore	extant	10.5
Raphicerus melanotis	Artiodactyla	Herbivore	extant	10.2499
Raphicerus sharpei	Artiodactyla	Herbivore	extant	9.4999
Redunca arundinum	Artiodactyla	Herbivore	extant	58.0003
Redunca fulvorufula	Artiodactyla	Herbivore	extant	29.4999
Redunca redunca	Artiodactyla	Herbivore	extant	44.0504
Rupicapra pyrenaica	Artiodactyla	Herbivore	extant	30
Rupicapra rupicapra	Artiodactyla	Herbivore	extant	26.1
Saiga tatarica	Artiodactyla	Herbivore	extant	29
Sigmoceros lichtensteinii	Artiodactyla	Herbivore	extant	171.498
Sus barbatus	Artiodactyla	Herbivore	extant	96.6667
Sus salvanius	Artiodactyla	Herbivore	extant	7.718
Sus scrofa	Artiodactyla	Herbivore	extant	96.1181
Sus verrucosus	Artiodactyla	Herbivore	extant	81.25
Sylvicapra grimmia	Artiodactyla	Herbivore	extant	19.4998
Syncerus caffer	Artiodactyla	Herbivore	extant	580.003
Taurotragus derbianus	Artiodactyla	Herbivore	extant	680
Taurotragus oryx	Artiodactyla	Herbivore	extant	569.994
Tayassu pecari	Artiodactyla	Herbivore	extant	32.2337
Tetracerus quadricornis	Artiodactyla	Herbivore	extant	19
Tragelaphus angasii	Artiodactyla	Herbivore	extant	86.6004
Tragelaphus buxtoni	Artiodactyla	Herbivore	extant	215.001
Tragelaphus eurycerus	Artiodactyla	Herbivore	extant	329.003
Tragelaphus imberbis	Artiodactyla	Herbivore	extant	81.5755
Tragelaphus scriptus	Artiodactyla	Herbivore	extant	43.2504
Tragelaphus spekii	Artiodactyla	Herbivore	extant	77.9992
Tragelaphus strepsiceros	Artiodactyla	Herbivore	extant	213.501
Tragulus javanicus	Artiodactyla	Herbivore	extant	2.775
Tragulus napu	Artiodactyla	Herbivore	extant	4.95
Vicugna vicugna	Artiodactyla	Herbivore	extant	47.4996
Acinonyx jubatus	Carnivora	Carnivore	extant	50
Ailuropoda melanoleuca	Carnivora	Carnivore	extant	108.4
Ailurus fulgens	Carnivora	Carnivore	extant	4.9
Alopex lagopus	Carnivora	Carnivore	extant	4.86765
Amblonyx cinereus	Carnivora	Carnivore	extant	1.7476
Aonyx capensis	Carnivora	Carnivore	extant	18.9998
Aonyx congicus	Carnivora	Carnivore	extant	23.8002
Arctictis binturong	Carnivora	Carnivore	extant	9.875
Arctocephalus australis	Carnivora	Carnivore	extant	45
Arctocephalus forsteri	Carnivora	Carnivore	extant	101.25
Arctocephalus galapagoensis	Carnivora	Carnivore	extant	27
Arctocephalus gazella	Carnivora	Carnivore	extant	97.5
Arctocephalus philippii	Carnivora	Carnivore	extant	95
Arctocephalus pusillus	Carnivora	Carnivore	extant	178.5
Arctocephalus townsendi	Carnivora	Carnivore	extant	105
Arctocephalus tropicalis	Carnivora	Carnivore	extant	84
Arctogalidia trivirgata	Carnivora	Carnivore	extant	2.25
Arctonyx collaris	Carnivora	Carnivore	extant	6.356
Atelocynus microtis	Carnivora	Carnivore	extant	7.75
Atilax paludinosus	Carnivora	Carnivore	extant	3.3
Bassaricyon alleni	Carnivora	Carnivore	extant	1.235
Bassaricyon beddardi	Carnivora	Carnivore	extant	1.235
Bassaricyon gabbii	Carnivora	Carnivore	extant	1.25
Bassaricyon lasius	Carnivora	Carnivore	extant	1.2
Bassaricyon pauli	Carnivora	Carnivore	extant	1.2
Bassariscus astutus	Carnivora	Carnivore	extant	1.1295
Bassariscus sumichrasti	Carnivora	Carnivore	extant	0.9
Bdeogale crassicauda	Carnivora	Carnivore	extant	1.55
Bdeogale jacksoni	Carnivora	Carnivore	extant	2.5
Bdeogale nigripes	Carnivora	Carnivore	extant	2.5
Callorhinus ursinus	Carnivora	Carnivore	extant	45.133
Canis adustus	Carnivora	Carnivore	extant	10.2499
Canis aureus	Carnivora	Carnivore	extant	10.3452
Canis latrans	Carnivora	Carnivore	extant	13.4063
Canis lupus	Carnivora	Carnivore	extant	32.1833
Canis mesomelas	Carnivora	Carnivore	extant	8.5
Canis rufus	Carnivora	Carnivore	extant	22.9832
Canis simensis	Carnivora	Carnivore	extant	10
Caracal caracal	Carnivora	Carnivore	extant	13.7499
Catopuma badia	Carnivora	Carnivore	extant	2.5
Catopuma temminckii	Carnivora	Carnivore	extant	11.5
Cerdocyon thous	Carnivora	Carnivore	extant	5.24
Chrotogale owstoni	Carnivora	Carnivore	extant	3.25
Chrysocyon brachyurus	Carnivora	Carnivore	extant	23.2498
Civettictis civetta	Carnivora	Carnivore	extant	12
Conepatus chinga	Carnivora	Carnivore	extant	1.9175
Conepatus humboldtii	Carnivora	Carnivore	extant	0.328
Conepatus leuconotus	Carnivora	Carnivore	extant	3.5
Conepatus mesoleucus	Carnivora	Carnivore	extant	2.01
Conepatus semistriatus	Carnivora	Carnivore	extant	1.2
Crocuta crocuta	Carnivora	Carnivore	extant	62.9999
Crossarchus alexandri	Carnivora	Carnivore	extant	1.5
Crossarchus ansorgei	Carnivora	Carnivore	extant	0.7
Crossarchus obscurus	Carnivora	Carnivore	extant	1.25
Cryptoprocta ferox	Carnivora	Carnivore	extant	9.5
Cuon alpinus	Carnivora	Carnivore	extant	14.1733
Cynictis penicillata	Carnivora	Carnivore	extant	0.836
Cynogale bennettii	Carnivora	Carnivore	extant	4.5
Cystophora cristata	Carnivora	Carnivore	extant	288.334
Dologale dybowskii	Carnivora	Carnivore	extant	0.35
Eira barbara	Carnivora	Carnivore	extant	3.91
Enhydra lutris	Carnivora	Carnivore	extant	23.5
Erignathus barbatus	Carnivora	Carnivore	extant	280
Eumetopias jubatus	Carnivora	Carnivore	extant	310
Eupleres goudotii	Carnivora	Carnivore	extant	3
Felis bieti	Carnivora	Carnivore	extant	5.5
Felis chaus	Carnivora	Carnivore	extant	7.39297
Felis margarita	Carnivora	Carnivore	extant	2.525
Felis nigripes	Carnivora	Carnivore	extant	1.3
Felis silvestris	Carnivora	Carnivore	extant	5.1
Fossa fossana	Carnivora	Carnivore	extant	1.5
Galerella flavescens	Carnivora	Carnivore	extant	0.75
Galerella pulverulenta	Carnivora	Carnivore	extant	0.797
Galerella sanguinea	Carnivora	Carnivore	extant	0.55
Galerella swalius	Carnivora	Carnivore	extant	0.75
Galictis cuja	Carnivora	Carnivore	extant	1
Galictis vittata	Carnivora	Carnivore	extant	3.2
Galidia elegans	Carnivora	Carnivore	extant	0.8
Galidictis fasciata	Carnivora	Carnivore	extant	0.55
Galidictis grandidieri	Carnivora	Carnivore	extant	1.4
Genetta abyssinica	Carnivora	Carnivore	extant	1.65
Genetta angolensis	Carnivora	Carnivore	extant	1.65
Genetta genetta	Carnivora	Carnivore	extant	1.8
Genetta johnstoni	Carnivora	Carnivore	extant	2.225
Genetta maculata	Carnivora	Carnivore	extant	2.225
Genetta servalina	Carnivora	Carnivore	extant	1.055
Genetta thierryi	Carnivora	Carnivore	extant	1.4
Genetta tigrina	Carnivora	Carnivore	extant	2.225
Genetta victoriae	Carnivora	Carnivore	extant	3
Gulo gulo	Carnivora	Carnivore	extant	17.0126
Halichoerus grypus	Carnivora	Carnivore	extant	157.667
Helarctos malayanus	Carnivora	Carnivore	extant	46.5
Helogale hirtula	Carnivora	Carnivore	extant	0.289
Helogale parvula	Carnivora	Carnivore	extant	0.3
Hemigalus derbyanus	Carnivora	Carnivore	extant	2.11687
Herpailurus yaguarondi	Carnivora	Carnivore	extant	7.8749
Herpestes brachyurus	Carnivora	Carnivore	extant	1.85352
Herpestes edwardsii	Carnivora	Carnivore	extant	1.3242
Herpestes ichneumon	Carnivora	Carnivore	extant	5.175
Herpestes javanicus	Carnivora	Carnivore	extant	0.75
Herpestes naso	Carnivora	Carnivore	extant	3
Herpestes smithii	Carnivora	Carnivore	extant	1.78195
Herpestes urva	Carnivora	Carnivore	extant	1.8632
Herpestes vitticollis	Carnivora	Carnivore	extant	2.5756
Hyaena hyaena	Carnivora	Carnivore	extant	41.7051
Hydrurga leptonyx	Carnivora	Carnivore	extant	360
Ichneumia albicauda	Carnivora	Carnivore	extant	3.5
Ictonyx libyca	Carnivora	Carnivore	extant	2.0625
Ictonyx striatus	Carnivora	Carnivore	extant	1.3
Leopardus pardalis	Carnivora	Carnivore	extant	11.9001
Leopardus tigrinus	Carnivora	Carnivore	extant	2.25
Leopardus wiedii	Carnivora	Carnivore	extant	3.25
Leptailurus serval	Carnivora	Carnivore	extant	12
Leptonychotes weddellii	Carnivora	Carnivore	extant	400
Liberiictis kuhni	Carnivora	Carnivore	extant	2.15
Lobodon carcinophagus	Carnivora	Carnivore	extant	225
Lontra canadensis	Carnivora	Carnivore	extant	8.0874
Lontra felina	Carnivora	Carnivore	extant	30.6
Lontra longicaudis	Carnivora	Carnivore	extant	6.555
Lontra provocax	Carnivora	Carnivore	extant	7.5
Lutra lutra	Carnivora	Carnivore	extant	8.78513
Lutra maculicollis	Carnivora	Carnivore	extant	4
Lutra sumatrana	Carnivora	Carnivore	extant	5.5
Lutrogale perspicillata	Carnivora	Carnivore	extant	9
Lycaon pictus	Carnivora	Carnivore	extant	22.0501
Lyncodon patagonicus	Carnivora	Carnivore	extant	0.225
Lynx canadensis	Carnivora	Carnivore	extant	9.3732
Lynx lynx	Carnivora	Carnivore	extant	17.95
Lynx pardinus	Carnivora	Carnivore	extant	9.4
Lynx rufus	Carnivora	Carnivore	extant	8.9041
Macrogalidia musschenbroekii	Carnivora	Carnivore	extant	4
Martes americana	Carnivora	Carnivore	extant	1.25
Martes flavigula	Carnivora	Carnivore	extant	1.8425
Martes foina	Carnivora	Carnivore	extant	1.5408
Martes gwatkinsii	Carnivora	Carnivore	extant	2.043
Martes martes	Carnivora	Carnivore	extant	1.3
Martes melampus	Carnivora	Carnivore	extant	1
Martes pennanti	Carnivora	Carnivore	extant	4
Martes zibellina	Carnivora	Carnivore	extant	1.13
Meles meles	Carnivora	Carnivore	extant	13
Mellivora capensis	Carnivora	Carnivore	extant	8.5
Melogale moschata	Carnivora	Carnivore	extant	0.80525
Melogale orientalis	Carnivora	Carnivore	extant	2
Melogale personata	Carnivora	Carnivore	extant	1.7025
Melursus ursinus	Carnivora	Carnivore	extant	93.13
Mephitis macroura	Carnivora	Carnivore	extant	0.8013
Mephitis mephitis	Carnivora	Carnivore	extant	2.085
Mirounga angustirostris	Carnivora	Carnivore	extant	750
Mirounga leonina	Carnivora	Carnivore	extant	1600
Monachus monachus	Carnivora	Carnivore	extant	292.5
Monachus schauinslandi	Carnivora	Carnivore	extant	223
Monachus tropicalis	Carnivora	Carnivore	extant	200
Mungos gambianus	Carnivora	Carnivore	extant	1.5
Mungos mungo	Carnivora	Carnivore	extant	1.925
Mungotictis decemlineata	Carnivora	Carnivore	extant	0.65
Mustela africana	Carnivora	Carnivore	extant	0.537
Mustela altaica	Carnivora	Carnivore	extant	0.171
Mustela erminea	Carnivora	Carnivore	extant	0.1194
Mustela eversmannii	Carnivora	Carnivore	extant	1.35
Mustela felipei	Carnivora	Carnivore	extant	0.2113
Mustela frenata	Carnivora	Carnivore	extant	0.147
Mustela kathiah	Carnivora	Carnivore	extant	0.2081
Mustela lutreola	Carnivora	Carnivore	extant	0.44
Mustela lutreolina	Carnivora	Carnivore	extant	0.7066
Mustela nigripes	Carnivora	Carnivore	extant	0.85
Mustela nivalis	Carnivora	Carnivore	extant	0.1039
Mustela nudipes	Carnivora	Carnivore	extant	0.5
Mustela putorius	Carnivora	Carnivore	extant	0.9154
Mustela sibirica	Carnivora	Carnivore	extant	0.405
Mustela vison	Carnivora	Carnivore	extant	0.945
Mydaus javanensis	Carnivora	Carnivore	extant	2.5
Nandinia binotata	Carnivora	Carnivore	extant	2
Nasua narica	Carnivora	Carnivore	extant	4.03
Nasua nasua	Carnivora	Carnivore	extant	3.7938
Nasuella olivacea	Carnivora	Carnivore	extant	1.34
Neofelis nebulosa	Carnivora	Carnivore	extant	19.6758
Neophoca cinerea	Carnivora	Carnivore	extant	190
Nyctereutes procyonoides	Carnivora	Carnivore	extant	4.04
Odobenus rosmarus	Carnivora	Carnivore	extant	825
Ommatophoca rossii	Carnivora	Carnivore	extant	250
Oncifelis colocolo	Carnivora	Carnivore	extant	3.935
Oncifelis geoffroyi	Carnivora	Carnivore	extant	3.59
Oncifelis guigna	Carnivora	Carnivore	extant	2.23
Oreailurus jacobita	Carnivora	Carnivore	extant	9.17
Osbornictis piscivora	Carnivora	Carnivore	extant	3
Otaria byronia	Carnivora	Carnivore	extant	140
Otocolobus manul	Carnivora	Carnivore	extant	3.5
Otocyon megalotis	Carnivora	Carnivore	extant	4.15
Paguma larvata	Carnivora	Carnivore	extant	4.3
Panthera leo	Carnivora	Carnivore	extant	80.7524
Panthera onca	Carnivora	Carnivore	extant	100
Panthera pardus	Carnivora	Carnivore	extant	52.0382
Panthera tigris	Carnivora	Carnivore	extant	162.564
Paracynictis selousi	Carnivora	Carnivore	extant	1.64
Paradoxurus hermaphroditus	Carnivora	Carnivore	extant	3.15667
Paradoxurus jerdoni	Carnivora	Carnivore	extant	2.7808
Paradoxurus zeylonensis	Carnivora	Carnivore	extant	2.7808
Parahyaena brunnea	Carnivora	Carnivore	extant	32.2003
Pardofelis marmorata	Carnivora	Carnivore	extant	2.85425
Phoca caspica	Carnivora	Carnivore	extant	86
Phoca fasciata	Carnivora	Carnivore	extant	90
Phoca groenlandica	Carnivora	Carnivore	extant	120
Phoca hispida	Carnivora	Carnivore	extant	90.9
Phoca largha	Carnivora	Carnivore	extant	150
Phoca sibirica	Carnivora	Carnivore	extant	90
Phoca vitulina	Carnivora	Carnivore	extant	100
Poecilogale albinucha	Carnivora	Carnivore	extant	0.34
Poiana richardsonii	Carnivora	Carnivore	extant	0.5
Potos flavus	Carnivora	Carnivore	extant	3
Prionailurus bengalensis	Carnivora	Carnivore	extant	3.3
Prionailurus planiceps	Carnivora	Carnivore	extant	6.75
Prionailurus rubiginosus	Carnivora	Carnivore	extant	1.3844
Prionailurus viverrinus	Carnivora	Carnivore	extant	9.14033
Prionodon linsang	Carnivora	Carnivore	extant	0.7
Prionodon pardicolor	Carnivora	Carnivore	extant	0.512
Procyon cancrivorus	Carnivora	Carnivore	extant	6.9499
Procyon lotor	Carnivora	Carnivore	extant	5.525
Procyon pygmaeus	Carnivora	Carnivore	extant	2.5
Profelis aurata	Carnivora	Carnivore	extant	10.65
Proteles cristatus	Carnivora	Carnivore	extant	10
Pseudalopex culpaeus	Carnivora	Carnivore	extant	9.8324
Pseudalopex griseus	Carnivora	Carnivore	extant	8.28
Pseudalopex gymnocercus	Carnivora	Carnivore	extant	4.69
Pseudalopex sechurae	Carnivora	Carnivore	extant	4
Pseudalopex vetulus	Carnivora	Carnivore	extant	5.35
Pteronura brasiliensis	Carnivora	Carnivore	extant	23.9999
Puma concolor	Carnivora	Carnivore	extant	51.6
Rhynchogale melleri	Carnivora	Carnivore	extant	2.5
Salanoia concolor	Carnivora	Carnivore	extant	0.65
Speothos venaticus	Carnivora	Carnivore	extant	6
Spilogale putorius	Carnivora	Carnivore	extant	0.341
Spilogale pygmaea	Carnivora	Carnivore	extant	0.235
Suricata suricatta	Carnivora	Carnivore	extant	0.7255
Taxidea taxus	Carnivora	Carnivore	extant	7.1076
Tremarctos ornatus	Carnivora	Carnivore	extant	140.001
Uncia uncia	Carnivora	Carnivore	extant	44.167
Urocyon cinereoargenteus	Carnivora	Carnivore	extant	3.8337
Urocyon littoralis	Carnivora	Carnivore	extant	1.896
Ursus americanus	Carnivora	Carnivore	extant	99.9494
Ursus arctos	Carnivora	Carnivore	extant	172.72
Ursus maritimus	Carnivora	Carnivore	extant	388.75
Ursus thibetanus	Carnivora	Carnivore	extant	77.5
Viverra megaspila	Carnivora	Carnivore	extant	9.25
Viverra tangalunga	Carnivora	Carnivore	extant	8.675
Viverra zibetha	Carnivora	Carnivore	extant	9.5
Viverricula indica	Carnivora	Carnivore	extant	2.90844
Vormela peregusna	Carnivora	Carnivore	extant	0.543
Vulpes bengalensis	Carnivora	Carnivore	extant	2.726
Vulpes cana	Carnivora	Carnivore	extant	1
Vulpes chama	Carnivora	Carnivore	extant	2.955
Vulpes corsac	Carnivora	Carnivore	extant	2.4
Vulpes ferrilata	Carnivora	Carnivore	extant	5
Vulpes pallida	Carnivora	Carnivore	extant	2.8
Vulpes rueppelli	Carnivora	Carnivore	extant	3.25
Vulpes velox	Carnivora	Carnivore	extant	2.1975
Vulpes vulpes	Carnivora	Carnivore	extant	5.60375
Vulpes zerda	Carnivora	Carnivore	extant	1.1
Zalophus californianus	Carnivora	Carnivore	extant	80
Acerodon celebensis	Chiroptera	Airborne	extant	0.39
Acerodon jubatus	Chiroptera	Airborne	extant	1.075
Acerodon mackloti	Chiroptera	Airborne	extant	0.4703
Aethalops alecto	Chiroptera	Airborne	extant	0.015
Alionycteris paucidentata	Chiroptera	Airborne	extant	0.0162
Ametrida centurio	Chiroptera	Airborne	extant	0.0103
Anoura caudifer	Chiroptera	Airborne	extant	0.0107
Anoura cultrata	Chiroptera	Airborne	extant	0.0169
Anoura geoffroyi	Chiroptera	Airborne	extant	0.0147
Anoura latidens	Chiroptera	Airborne	extant	0.0147
Antrozous dubiaquercus	Chiroptera	Airborne	extant	0.0229
Antrozous pallidus	Chiroptera	Airborne	extant	0.0208
Aproteles bulmerae	Chiroptera	Airborne	extant	0.6
Ardops nichollsi	Chiroptera	Airborne	extant	0.0172
Artibeus amplus	Chiroptera	Airborne	extant	0.06
Artibeus anderseni	Chiroptera	Airborne	extant	0.138
Artibeus aztecus	Chiroptera	Airborne	extant	0.0204
Artibeus cinereus	Chiroptera	Airborne	extant	0.0126
Artibeus concolor	Chiroptera	Airborne	extant	0.0194
Artibeus fimbriatus	Chiroptera	Airborne	extant	0.0639
Artibeus glaucus	Chiroptera	Airborne	extant	0.0111
Artibeus hartii	Chiroptera	Airborne	extant	0.016
Artibeus hirsutus	Chiroptera	Airborne	extant	0.0387
Artibeus jamaicensis	Chiroptera	Airborne	extant	0.0422
Artibeus lituratus	Chiroptera	Airborne	extant	0.0603
Artibeus obscurus	Chiroptera	Airborne	extant	0.0352
Artibeus phaeotis	Chiroptera	Airborne	extant	0.0116
Artibeus planirostris	Chiroptera	Airborne	extant	0.047
Artibeus toltecus	Chiroptera	Airborne	extant	0.0154
Asellia tridens	Chiroptera	Airborne	extant	0.0119
Aselliscus stoliczkanus	Chiroptera	Airborne	extant	0.0049
Aselliscus tricuspidatus	Chiroptera	Airborne	extant	0.0041
Balantiopteryx io	Chiroptera	Airborne	extant	0.0043
Balantiopteryx plicata	Chiroptera	Airborne	extant	0.0064
Balionycteris maculata	Chiroptera	Airborne	extant	0.0142
Barbastella barbastellus	Chiroptera	Airborne	extant	0.008
Barbastella leucomelas	Chiroptera	Airborne	extant	0.0151
Brachyphylla cavernarum	Chiroptera	Airborne	extant	0.0462
Brachyphylla nana	Chiroptera	Airborne	extant	0.0358
Cardioderma cor	Chiroptera	Airborne	extant	0.0278
Carollia brevicauda	Chiroptera	Airborne	extant	0.0144
Carollia castanea	Chiroptera	Airborne	extant	0.0133
Carollia perspicillata	Chiroptera	Airborne	extant	0.0189
Carollia subrufa	Chiroptera	Airborne	extant	0.0156
Casinycteris argynnis	Chiroptera	Airborne	extant	0.0299
Centurio senex	Chiroptera	Airborne	extant	0.0213
Chaerephon bivittata	Chiroptera	Airborne	extant	0.015
Chaerephon jobensis	Chiroptera	Airborne	extant	0.0213
Chaerephon major	Chiroptera	Airborne	extant	0.0148
Chaerephon nigeriae	Chiroptera	Airborne	extant	0.0198
Chaerephon plicata	Chiroptera	Airborne	extant	0.02
Chaerephon pumila	Chiroptera	Airborne	extant	0.0113
Chaerephon russata	Chiroptera	Airborne	extant	0.0165
Chalinolobus argentatus	Chiroptera	Airborne	extant	0.0091
Chalinolobus beatrix	Chiroptera	Airborne	extant	0.0065
Chalinolobus dwyeri	Chiroptera	Airborne	extant	0.009
Chalinolobus gleni	Chiroptera	Airborne	extant	0.0108
Chalinolobus gouldii	Chiroptera	Airborne	extant	0.0145
Chalinolobus kenyacola	Chiroptera	Airborne	extant	0.007
Chalinolobus morio	Chiroptera	Airborne	extant	0.0088
Chalinolobus nigrogriseus	Chiroptera	Airborne	extant	0.0088
Chalinolobus poensis	Chiroptera	Airborne	extant	0.0071
Chalinolobus variegatus	Chiroptera	Airborne	extant	0.0111
Cheiromeles torquatus	Chiroptera	Airborne	extant	0.1635
Chiroderma doriae	Chiroptera	Airborne	extant	0.0199
Chiroderma improvisum	Chiroptera	Airborne	extant	0.035
Chiroderma salvini	Chiroptera	Airborne	extant	0.0255
Chiroderma trinitatum	Chiroptera	Airborne	extant	0.0137
Chiroderma villosum	Chiroptera	Airborne	extant	0.0231
Chironax melanocephalus	Chiroptera	Airborne	extant	0.0176
Choeroniscus godmani	Chiroptera	Airborne	extant	0.0079
Choeroniscus intermedius	Chiroptera	Airborne	extant	0.0058
Choeroniscus minor	Chiroptera	Airborne	extant	0.0087
Choeronycteris mexicana	Chiroptera	Airborne	extant	0.0166
Chrotopterus auritus	Chiroptera	Airborne	extant	0.0779
Cloeotis percivali	Chiroptera	Airborne	extant	0.0041
Coelops frithi	Chiroptera	Airborne	extant	0.0074
Coelops robinsoni	Chiroptera	Airborne	extant	0.0065
Coleura afra	Chiroptera	Airborne	extant	0.0107
Coleura seychellensis	Chiroptera	Airborne	extant	0.0106
Cormura brevirostris	Chiroptera	Airborne	extant	0.0092
Craseonycteris thonglongyai	Chiroptera	Airborne	extant	0.0022
Cynopterus brachyotis	Chiroptera	Airborne	extant	0.0318
Cynopterus horsfieldi	Chiroptera	Airborne	extant	0.0548
Cynopterus sphinx	Chiroptera	Airborne	extant	0.0437
Cynopterus titthaecheileus	Chiroptera	Airborne	extant	0.0563
Cyttarops alecto	Chiroptera	Airborne	extant	0.0053
Desmodus rotundus	Chiroptera	Airborne	extant	0.0332
Diaemus youngi	Chiroptera	Airborne	extant	0.0361
Diclidurus albus	Chiroptera	Airborne	extant	0.0156
Diclidurus isabellus	Chiroptera	Airborne	extant	0.014
Diclidurus scutatus	Chiroptera	Airborne	extant	0.0133
Diphylla ecaudata	Chiroptera	Airborne	extant	0.0293
Dobsonia beauforti	Chiroptera	Airborne	extant	0.159
Dobsonia emersa	Chiroptera	Airborne	extant	0.1955
Dobsonia exoleta	Chiroptera	Airborne	extant	0.249
Dobsonia inermis	Chiroptera	Airborne	extant	0.1495
Dobsonia minor	Chiroptera	Airborne	extant	0.0782
Dobsonia moluccensis	Chiroptera	Airborne	extant	0.3814
Dobsonia pannietensis	Chiroptera	Airborne	extant	0.2677
Dobsonia peroni	Chiroptera	Airborne	extant	0.2169
Dobsonia praedatrix	Chiroptera	Airborne	extant	0.1887
Dobsonia viridis	Chiroptera	Airborne	extant	0.238
Dyacopterus spadiceus	Chiroptera	Airborne	extant	0.078
Ectophylla alba	Chiroptera	Airborne	extant	0.0058
Eidolon dupreanum	Chiroptera	Airborne	extant	0.2838
Eidolon helvum	Chiroptera	Airborne	extant	0.2533
Emballonura alecto	Chiroptera	Airborne	extant	0.0053
Emballonura beccarii	Chiroptera	Airborne	extant	0.0042
Emballonura monticola	Chiroptera	Airborne	extant	0.0054
Emballonura raffrayana	Chiroptera	Airborne	extant	0.0056
Emballonura semicaudata	Chiroptera	Airborne	extant	0.0063
Eonycteris major	Chiroptera	Airborne	extant	0.0728
Eonycteris spelaea	Chiroptera	Airborne	extant	0.0567
Epomophorus gambianus	Chiroptera	Airborne	extant	0.1289
Epomophorus grandis	Chiroptera	Airborne	extant	0.0486
Epomophorus labiatus	Chiroptera	Airborne	extant	0.063
Epomophorus wahlbergi	Chiroptera	Airborne	extant	0.0916
Epomops buettikoferi	Chiroptera	Airborne	extant	0.1338
Epomops dobsoni	Chiroptera	Airborne	extant	0.12
Epomops franqueti	Chiroptera	Airborne	extant	0.1189
Eptesicus bobrinskoi	Chiroptera	Airborne	extant	0.0076
Eptesicus bottae	Chiroptera	Airborne	extant	0.0142
Eptesicus brasiliensis	Chiroptera	Airborne	extant	0.0095
Eptesicus capensis	Chiroptera	Airborne	extant	0.006
Eptesicus demissus	Chiroptera	Airborne	extant	0.015
Eptesicus diminutus	Chiroptera	Airborne	extant	0.006
Eptesicus douglasorum	Chiroptera	Airborne	extant	0.005
Eptesicus flavescens	Chiroptera	Airborne	extant	0.0105
Eptesicus furinalis	Chiroptera	Airborne	extant	0.0077
Eptesicus fuscus	Chiroptera	Airborne	extant	0.0165
Eptesicus hottentotus	Chiroptera	Airborne	extant	0.03
Eptesicus nasutus	Chiroptera	Airborne	extant	0.0079
Eptesicus nilssoni	Chiroptera	Airborne	extant	0.0104
Eptesicus pachyotis	Chiroptera	Airborne	extant	0.0083
Eptesicus pumilus	Chiroptera	Airborne	extant	0.0051
Eptesicus regulus	Chiroptera	Airborne	extant	0.0051
Eptesicus rendalli	Chiroptera	Airborne	extant	0.0063
Eptesicus sagittula	Chiroptera	Airborne	extant	0.0065
Eptesicus serotinus	Chiroptera	Airborne	extant	0.0229
Eptesicus somalicus	Chiroptera	Airborne	extant	0.0038
Eptesicus tenuipinnis	Chiroptera	Airborne	extant	0.0053
Eptesicus vulturnus	Chiroptera	Airborne	extant	0.0038
Erophylla sezekorni	Chiroptera	Airborne	extant	0.0158
Euderma maculatum	Chiroptera	Airborne	extant	0.0157
Eumops auripendulus	Chiroptera	Airborne	extant	0.0285
Eumops bonariensis	Chiroptera	Airborne	extant	0.0119
Eumops dabbenei	Chiroptera	Airborne	extant	0.1044
Eumops glaucinus	Chiroptera	Airborne	extant	0.0354
Eumops hansae	Chiroptera	Airborne	extant	0.0151
Eumops perotis	Chiroptera	Airborne	extant	0.0511
Eumops underwoodi	Chiroptera	Airborne	extant	0.0547
Furipterus horrens	Chiroptera	Airborne	extant	0.0032
Glischropus tylopus	Chiroptera	Airborne	extant	0.0044
Glossophaga commissarisi	Chiroptera	Airborne	extant	0.0089
Glossophaga leachii	Chiroptera	Airborne	extant	0.0101
Glossophaga longirostris	Chiroptera	Airborne	extant	0.0124
Glossophaga morenoi	Chiroptera	Airborne	extant	0.0084
Glossophaga soricina	Chiroptera	Airborne	extant	0.01
Haplonycteris fischeri	Chiroptera	Airborne	extant	0.018
Harpiocephalus harpia	Chiroptera	Airborne	extant	0.0136
Harpyionycteris celebensis	Chiroptera	Airborne	extant	0.104
Harpyionycteris whiteheadi	Chiroptera	Airborne	extant	0.1105
Hesperoptenus blanfordi	Chiroptera	Airborne	extant	0.0068
Hesperoptenus tickelli	Chiroptera	Airborne	extant	0.0163
Hipposideros armiger	Chiroptera	Airborne	extant	0.053
Hipposideros ater	Chiroptera	Airborne	extant	0.0058
Hipposideros beatus	Chiroptera	Airborne	extant	0.0067
Hipposideros bicolor	Chiroptera	Airborne	extant	0.0076
Hipposideros caffer	Chiroptera	Airborne	extant	0.00943333
Hipposideros calcaratus	Chiroptera	Airborne	extant	0.0114
Hipposideros cervinus	Chiroptera	Airborne	extant	0.0093
Hipposideros cineraceus	Chiroptera	Airborne	extant	0.004
Hipposideros commersoni	Chiroptera	Airborne	extant	0.0991
Hipposideros corynophyllus	Chiroptera	Airborne	extant	0.0145
Hipposideros cyclops	Chiroptera	Airborne	extant	0.0335
Hipposideros diadema	Chiroptera	Airborne	extant	0.0438
Hipposideros fulvus	Chiroptera	Airborne	extant	0.0085
Hipposideros galeritus	Chiroptera	Airborne	extant	0.009
Hipposideros halophyllus	Chiroptera	Airborne	extant	0.004
Hipposideros jonesi	Chiroptera	Airborne	extant	0.0055
Hipposideros lankadiva	Chiroptera	Airborne	extant	0.0524
Hipposideros larvatus	Chiroptera	Airborne	extant	0.0199
Hipposideros lekaguli	Chiroptera	Airborne	extant	0.0311
Hipposideros lylei	Chiroptera	Airborne	extant	0.04
Hipposideros maggietaylorae	Chiroptera	Airborne	extant	0.0185
Hipposideros obscurus	Chiroptera	Airborne	extant	0.0095
Hipposideros pomona	Chiroptera	Airborne	extant	0.0062
Hipposideros pygmaeus	Chiroptera	Airborne	extant	0.0035
Hipposideros ridleyi	Chiroptera	Airborne	extant	0.0097
Hipposideros ruber	Chiroptera	Airborne	extant	0.0101
Hipposideros sabanus	Chiroptera	Airborne	extant	0.0042
Hipposideros semoni	Chiroptera	Airborne	extant	0.014
Hipposideros speoris	Chiroptera	Airborne	extant	0.0104
Hipposideros stenotis	Chiroptera	Airborne	extant	0.012
Hipposideros turpis	Chiroptera	Airborne	extant	0.0334
Hipposideros wollastoni	Chiroptera	Airborne	extant	0.0068
Histiotus macrotus	Chiroptera	Airborne	extant	0.011
Histiotus velatus	Chiroptera	Airborne	extant	0.0112
Hylonycteris underwoodi	Chiroptera	Airborne	extant	0.0067
Hypsignathus monstrosus	Chiroptera	Airborne	extant	0.3351
Ia io	Chiroptera	Airborne	extant	0.0492
Idionycteris phyllotis	Chiroptera	Airborne	extant	0.012
Kerivoula argentata	Chiroptera	Airborne	extant	0.01
Kerivoula atrox	Chiroptera	Airborne	extant	0.0048
Kerivoula flora	Chiroptera	Airborne	extant	0.006
Kerivoula hardwickei	Chiroptera	Airborne	extant	0.0045
Kerivoula jagori	Chiroptera	Airborne	extant	0.0047
Kerivoula lanosa	Chiroptera	Airborne	extant	0.0065
Kerivoula minuta	Chiroptera	Airborne	extant	0.002
Kerivoula muscina	Chiroptera	Airborne	extant	0.0052
Kerivoula papillosa	Chiroptera	Airborne	extant	0.0101
Kerivoula papuensis	Chiroptera	Airborne	extant	0.0062
Kerivoula pellucida	Chiroptera	Airborne	extant	0.0041
Kerivoula phalaena	Chiroptera	Airborne	extant	0.003
Kerivoula picta	Chiroptera	Airborne	extant	0.0045
Kerivoula whiteheadi	Chiroptera	Airborne	extant	0.0033
Laephotis botswanae	Chiroptera	Airborne	extant	0.0072
Laephotis wintoni	Chiroptera	Airborne	extant	0.006
Lasionycteris noctivagans	Chiroptera	Airborne	extant	0.0105
Lasiurus borealis	Chiroptera	Airborne	extant	0.0107
Lasiurus castaneus	Chiroptera	Airborne	extant	0.0136
Lasiurus cinereus	Chiroptera	Airborne	extant	0.0253
Lasiurus ega	Chiroptera	Airborne	extant	0.0132
Lasiurus intermedius	Chiroptera	Airborne	extant	0.023
Lasiurus seminolus	Chiroptera	Airborne	extant	0.0099
Lavia frons	Chiroptera	Airborne	extant	0.0239
Leptonycteris curasoae	Chiroptera	Airborne	extant	0.0234
Leptonycteris nivalis	Chiroptera	Airborne	extant	0.0256
Lichonycteris obscura	Chiroptera	Airborne	extant	0.0056
Lionycteris spurrelli	Chiroptera	Airborne	extant	0.0084
Lonchophylla mordax	Chiroptera	Airborne	extant	0.0107
Lonchophylla robusta	Chiroptera	Airborne	extant	0.013
Lonchophylla thomasi	Chiroptera	Airborne	extant	0.0069
Lonchorhina aurita	Chiroptera	Airborne	extant	0.0157
Lonchorhina marinkellei	Chiroptera	Airborne	extant	0.017
Lonchorhina orinocensis	Chiroptera	Airborne	extant	0.0088
Macroderma gigas	Chiroptera	Airborne	extant	0.1264
Macroglossus minimus	Chiroptera	Airborne	extant	0.0159
Macroglossus sobrinus	Chiroptera	Airborne	extant	0.0221
Macrophyllum macrophyllum	Chiroptera	Airborne	extant	0.0081
Macrotus californicus	Chiroptera	Airborne	extant	0.0116
Macrotus waterhousii	Chiroptera	Airborne	extant	0.0128
Megaderma lyra	Chiroptera	Airborne	extant	0.0455
Megaderma spasma	Chiroptera	Airborne	extant	0.0248
Megaerops ecaudatus	Chiroptera	Airborne	extant	0.0247
Megaerops niphanae	Chiroptera	Airborne	extant	0.0326
Megaerops wetmorei	Chiroptera	Airborne	extant	0.0185
Megaloglossus woermanni	Chiroptera	Airborne	extant	0.0157
Melonycteris aurantius	Chiroptera	Airborne	extant	0.0292
Melonycteris melanops	Chiroptera	Airborne	extant	0.049
Melonycteris woodfordi	Chiroptera	Airborne	extant	0.0369
Mesophylla macconnelli	Chiroptera	Airborne	extant	0.0069
Micronycteris brachyotis	Chiroptera	Airborne	extant	0.0105
Micronycteris daviesi	Chiroptera	Airborne	extant	0.0183
Micronycteris hirsuta	Chiroptera	Airborne	extant	0.0124
Micronycteris megalotis	Chiroptera	Airborne	extant	0.0063
Micronycteris minuta	Chiroptera	Airborne	extant	0.0065
Micronycteris nicefori	Chiroptera	Airborne	extant	0.0082
Micronycteris schmidtorum	Chiroptera	Airborne	extant	0.0075
Micronycteris sylvestris	Chiroptera	Airborne	extant	0.0088
Micropteropus pusillus	Chiroptera	Airborne	extant	0.0266
Mimetillus moloneyi	Chiroptera	Airborne	extant	0.0088
Mimon crenulatum	Chiroptera	Airborne	extant	0.0138
Miniopterus australis	Chiroptera	Airborne	extant	0.0073
Miniopterus fraterculus	Chiroptera	Airborne	extant	0.0073
Miniopterus fuscus	Chiroptera	Airborne	extant	0.0107
Miniopterus inflatus	Chiroptera	Airborne	extant	0.0142
Miniopterus magnater	Chiroptera	Airborne	extant	0.0141
Miniopterus minor	Chiroptera	Airborne	extant	0.007
Miniopterus pusillus	Chiroptera	Airborne	extant	0.0086
Miniopterus schreibersi	Chiroptera	Airborne	extant	0.0115
Miniopterus tristis	Chiroptera	Airborne	extant	0.0158
Molossops abrasus	Chiroptera	Airborne	extant	0.041
Molossops greenhalli	Chiroptera	Airborne	extant	0.015
Molossops mattogrossensis	Chiroptera	Airborne	extant	0.0068
Molossops planirostris	Chiroptera	Airborne	extant	0.0124
Molossops temminckii	Chiroptera	Airborne	extant	0.0059
Molossus ater	Chiroptera	Airborne	extant	0.0317
Molossus bondae	Chiroptera	Airborne	extant	0.0178
Molossus molossus	Chiroptera	Airborne	extant	0.0136
Molossus sinaloae	Chiroptera	Airborne	extant	0.0226
Monophyllus plethodon	Chiroptera	Airborne	extant	0.0148
Monophyllus redmani	Chiroptera	Airborne	extant	0.0087
Mops brachypterus	Chiroptera	Airborne	extant	0.016
Mops condylurus	Chiroptera	Airborne	extant	0.0284
Mops congicus	Chiroptera	Airborne	extant	0.043
Mops midas	Chiroptera	Airborne	extant	0.0452
Mops mops	Chiroptera	Airborne	extant	0.031
Mops niveiventer	Chiroptera	Airborne	extant	0.0217
Mops thersites	Chiroptera	Airborne	extant	0.022
Mormoops blainvillii	Chiroptera	Airborne	extant	0.0086
Mormoops megalophylla	Chiroptera	Airborne	extant	0.016
Mormopterus beccarii	Chiroptera	Airborne	extant	0.0149
Mormopterus jugularis	Chiroptera	Airborne	extant	0.0115
Mormopterus norfolkensis	Chiroptera	Airborne	extant	0.008
Mormopterus petrophilus	Chiroptera	Airborne	extant	0.0139
Mormopterus planiceps	Chiroptera	Airborne	extant	0.0088
Mosia nigrescens	Chiroptera	Airborne	extant	0.0033
Murina aenea	Chiroptera	Airborne	extant	0.0075
Murina cyclotis	Chiroptera	Airborne	extant	0.0091
Murina florium	Chiroptera	Airborne	extant	0.0043
Murina huttoni	Chiroptera	Airborne	extant	0.0076
Murina leucogaster	Chiroptera	Airborne	extant	0.0076
Murina suilla	Chiroptera	Airborne	extant	0.004
Murina tubinaris	Chiroptera	Airborne	extant	0.0055
Myonycteris relicta	Chiroptera	Airborne	extant	0.052
Myonycteris torquata	Chiroptera	Airborne	extant	0.0422
Myopterus whitleyi	Chiroptera	Airborne	extant	0.0115
Myotis adversus	Chiroptera	Airborne	extant	0.0106
Myotis albescens	Chiroptera	Airborne	extant	0.0053
Myotis altarium	Chiroptera	Airborne	extant	0.011
Myotis annectans	Chiroptera	Airborne	extant	0.0098
Myotis auriculus	Chiroptera	Airborne	extant	0.037
Myotis austroriparius	Chiroptera	Airborne	extant	0.0068
Myotis bechsteini	Chiroptera	Airborne	extant	0.0085
Myotis blythii	Chiroptera	Airborne	extant	0.0225
Myotis bocagei	Chiroptera	Airborne	extant	0.0078
Myotis brandti	Chiroptera	Airborne	extant	0.0053
Myotis californicus	Chiroptera	Airborne	extant	0.0046
Myotis capaccinii	Chiroptera	Airborne	extant	0.0074
Myotis dasycneme	Chiroptera	Airborne	extant	0.0141
Myotis daubentoni	Chiroptera	Airborne	extant	0.0074
Myotis elegans	Chiroptera	Airborne	extant	0.0041
Myotis emarginatus	Chiroptera	Airborne	extant	0.0077
Myotis evotis	Chiroptera	Airborne	extant	0.0067
Myotis formosus	Chiroptera	Airborne	extant	0.007
Myotis fortidens	Chiroptera	Airborne	extant	0.0044
Myotis frater	Chiroptera	Airborne	extant	0.0076
Myotis grisescens	Chiroptera	Airborne	extant	0.0105
Myotis hasseltii	Chiroptera	Airborne	extant	0.0088
Myotis horsfieldii	Chiroptera	Airborne	extant	0.006
Myotis keaysi	Chiroptera	Airborne	extant	0.0053
Myotis keenii	Chiroptera	Airborne	extant	0.0063
Myotis leibii	Chiroptera	Airborne	extant	0.0051
Myotis levis	Chiroptera	Airborne	extant	0.0055
Myotis lucifugus	Chiroptera	Airborne	extant	0.0076
Myotis macrodactylus	Chiroptera	Airborne	extant	0.0072
Myotis macrotarsus	Chiroptera	Airborne	extant	0.0125
Myotis montivagus	Chiroptera	Airborne	extant	0.0083
Myotis muricola	Chiroptera	Airborne	extant	0.0045
Myotis myotis	Chiroptera	Airborne	extant	0.0248
Myotis mystacinus	Chiroptera	Airborne	extant	0.005
Myotis nattereri	Chiroptera	Airborne	extant	0.0071
Myotis nesopolus	Chiroptera	Airborne	extant	0.0035
Myotis nigricans	Chiroptera	Airborne	extant	0.0042
Myotis oxyotus	Chiroptera	Airborne	extant	0.0055
Myotis ridleyi	Chiroptera	Airborne	extant	0.004
Myotis riparius	Chiroptera	Airborne	extant	0.0056
Myotis rosseti	Chiroptera	Airborne	extant	0.0033
Myotis ruber	Chiroptera	Airborne	extant	0.005
Myotis siligorensis	Chiroptera	Airborne	extant	0.003
Myotis sodalis	Chiroptera	Airborne	extant	0.0069
Myotis thysanodes	Chiroptera	Airborne	extant	0.0081
Myotis tricolor	Chiroptera	Airborne	extant	0.0139
Myotis velifer	Chiroptera	Airborne	extant	0.0101
Myotis vivesi	Chiroptera	Airborne	extant	0.025
Myotis volans	Chiroptera	Airborne	extant	0.0085
Myotis welwitschii	Chiroptera	Airborne	extant	0.0155
Myotis yumanensis	Chiroptera	Airborne	extant	0.0054
Mystacina robusta	Chiroptera	Airborne	extant	0.0273
Mystacina tuberculata	Chiroptera	Airborne	extant	0.0126
Nanonycteris veldkampi	Chiroptera	Airborne	extant	0.0214
Natalus stramineus	Chiroptera	Airborne	extant	0.0055
Natalus tumidifrons	Chiroptera	Airborne	extant	0.0035
Natalus tumidirostris	Chiroptera	Airborne	extant	0.0057
Noctilio albiventris	Chiroptera	Airborne	extant	0.0308
Noctilio leporinus	Chiroptera	Airborne	extant	0.0603
Notopteris macdonaldi	Chiroptera	Airborne	extant	0.0651
Nyctalus lasiopterus	Chiroptera	Airborne	extant	0.0497
Nyctalus leisleri	Chiroptera	Airborne	extant	0.0133
Nyctalus noctula	Chiroptera	Airborne	extant	0.028
Nycteris arge	Chiroptera	Airborne	extant	0.012
Nycteris gambiensis	Chiroptera	Airborne	extant	0.007
Nycteris grandis	Chiroptera	Airborne	extant	0.0302
Nycteris hispida	Chiroptera	Airborne	extant	0.0086
Nycteris javanica	Chiroptera	Airborne	extant	0.0177
Nycteris macrotis	Chiroptera	Airborne	extant	0.0145
Nycteris nana	Chiroptera	Airborne	extant	0.007
Nycteris thebaica	Chiroptera	Airborne	extant	0.0098
Nycteris tragata	Chiroptera	Airborne	extant	0.0144
Nycteris woodi	Chiroptera	Airborne	extant	0.0076
Nycticeius balstoni	Chiroptera	Airborne	extant	0.0117
Nycticeius greyii	Chiroptera	Airborne	extant	0.01
Nycticeius humeralis	Chiroptera	Airborne	extant	0.009
Nycticeius rueppellii	Chiroptera	Airborne	extant	0.0265
Nycticeius sanborni	Chiroptera	Airborne	extant	0.008
Nycticeius schlieffeni	Chiroptera	Airborne	extant	0.005
Nyctimene aello	Chiroptera	Airborne	extant	0.0843
Nyctimene albiventer	Chiroptera	Airborne	extant	0.0299
Nyctimene cephalotes	Chiroptera	Airborne	extant	0.0445
Nyctimene certans	Chiroptera	Airborne	extant	0.0421
Nyctimene cyclotis	Chiroptera	Airborne	extant	0.048
Nyctimene draconilla	Chiroptera	Airborne	extant	0.029
Nyctimene major	Chiroptera	Airborne	extant	0.1042
Nyctimene malaitensis	Chiroptera	Airborne	extant	0.0754
Nyctimene masalai	Chiroptera	Airborne	extant	0.0523
Nyctimene rabori	Chiroptera	Airborne	extant	0.0675
Nyctimene robinsoni	Chiroptera	Airborne	extant	0.0495
Nyctimene vizcaccia	Chiroptera	Airborne	extant	0.04
Nyctinomops aurispinosus	Chiroptera	Airborne	extant	0.018
Nyctinomops femorosaccus	Chiroptera	Airborne	extant	0.0146
Nyctinomops laticaudatus	Chiroptera	Airborne	extant	0.0122
Nyctinomops macrotis	Chiroptera	Airborne	extant	0.0184
Nyctophilus arnhemensis	Chiroptera	Airborne	extant	0.0067
Nyctophilus geoffroyi	Chiroptera	Airborne	extant	0.0073
Nyctophilus gouldi	Chiroptera	Airborne	extant	0.01
Nyctophilus microtis	Chiroptera	Airborne	extant	0.0071
Nyctophilus timoriensis	Chiroptera	Airborne	extant	0.0117
Nyctophilus walkeri	Chiroptera	Airborne	extant	0.0043
Otomops martiensseni	Chiroptera	Airborne	extant	0.0343
Otonycteris hemprichi	Chiroptera	Airborne	extant	0.0238
Otopteropus cartilagonodus	Chiroptera	Airborne	extant	0.0168
Paranyctimene raptor	Chiroptera	Airborne	extant	0.0243
Penthetor lucasi	Chiroptera	Airborne	extant	0.0382
Peropteryx kappleri	Chiroptera	Airborne	extant	0.0094
Peropteryx macrotis	Chiroptera	Airborne	extant	0.0054
Philetor brachypterus	Chiroptera	Airborne	extant	0.0116
Phylloderma stenops	Chiroptera	Airborne	extant	0.0537
Phyllostomus discolor	Chiroptera	Airborne	extant	0.0372
Phyllostomus elongatus	Chiroptera	Airborne	extant	0.0404
Phyllostomus hastatus	Chiroptera	Airborne	extant	0.0925
Pipistrellus arabicus	Chiroptera	Airborne	extant	0.0032
Pipistrellus babu	Chiroptera	Airborne	extant	0.0048
Pipistrellus bodenheimeri	Chiroptera	Airborne	extant	0.0027
Pipistrellus cadornae	Chiroptera	Airborne	extant	0.0067
Pipistrellus ceylonicus	Chiroptera	Airborne	extant	0.0084
Pipistrellus circumdatus	Chiroptera	Airborne	extant	0.0104
Pipistrellus coromandra	Chiroptera	Airborne	extant	0.0046
Pipistrellus crassulus	Chiroptera	Airborne	extant	0.0061
Pipistrellus dormeri	Chiroptera	Airborne	extant	0.0069
Pipistrellus eisentrauti	Chiroptera	Airborne	extant	0.006
Pipistrellus hesperus	Chiroptera	Airborne	extant	0.0037
Pipistrellus imbricatus	Chiroptera	Airborne	extant	0.0057
Pipistrellus javanicus	Chiroptera	Airborne	extant	0.0053
Pipistrellus kuhlii	Chiroptera	Airborne	extant	0.0059
Pipistrellus mimus	Chiroptera	Airborne	extant	0.0033
Pipistrellus nanulus	Chiroptera	Airborne	extant	0.0025
Pipistrellus nanus	Chiroptera	Airborne	extant	0.0039
Pipistrellus nathusii	Chiroptera	Airborne	extant	0.0073
Pipistrellus pipistrellus	Chiroptera	Airborne	extant	0.0057
Pipistrellus pulveratus	Chiroptera	Airborne	extant	0.0055
Pipistrellus rueppelli	Chiroptera	Airborne	extant	0.0069
Pipistrellus rusticus	Chiroptera	Airborne	extant	0.0046
Pipistrellus savii	Chiroptera	Airborne	extant	0.0064
Pipistrellus stenopterus	Chiroptera	Airborne	extant	0.0152
Pipistrellus subflavus	Chiroptera	Airborne	extant	0.0058
Pipistrellus tasmaniensis	Chiroptera	Airborne	extant	0.0227
Pipistrellus tenuis	Chiroptera	Airborne	extant	0.0047
Platyrrhinus aurarius	Chiroptera	Airborne	extant	0.0342
Platyrrhinus brachycephalus	Chiroptera	Airborne	extant	0.0141
Platyrrhinus dorsalis	Chiroptera	Airborne	extant	0.026
Platyrrhinus helleri	Chiroptera	Airborne	extant	0.0135
Platyrrhinus infuscus	Chiroptera	Airborne	extant	0.0502
Platyrrhinus lineatus	Chiroptera	Airborne	extant	0.0244
Platyrrhinus umbratus	Chiroptera	Airborne	extant	0.0245
Platyrrhinus vittatus	Chiroptera	Airborne	extant	0.0414
Plecotus auritus	Chiroptera	Airborne	extant	0.0078
Plecotus austriacus	Chiroptera	Airborne	extant	0.0073
Plecotus mexicanus	Chiroptera	Airborne	extant	0.0077
Plecotus rafinesquii	Chiroptera	Airborne	extant	0.0091
Plecotus townsendii	Chiroptera	Airborne	extant	0.0099
Promops centralis	Chiroptera	Airborne	extant	0.0264
Promops nasutus	Chiroptera	Airborne	extant	0.0152
Ptenochirus jagori	Chiroptera	Airborne	extant	0.0773
Ptenochirus minor	Chiroptera	Airborne	extant	0.0465
Pteralopex acrodonta	Chiroptera	Airborne	extant	0.2505
Pteralopex anceps	Chiroptera	Airborne	extant	0.5604
Pteralopex atrata	Chiroptera	Airborne	extant	0.472
Pteralopex pulchra	Chiroptera	Airborne	extant	0.28
Pteronotus davyi	Chiroptera	Airborne	extant	0.0092
Pteronotus gymnonotus	Chiroptera	Airborne	extant	0.0144
Pteronotus parnellii	Chiroptera	Airborne	extant	0.0197
Pteronotus personatus	Chiroptera	Airborne	extant	0.0087
Pteronotus quadridens	Chiroptera	Airborne	extant	0.0052
Pteropus admiralitatum	Chiroptera	Airborne	extant	0.2999
Pteropus aldabrensis	Chiroptera	Airborne	extant	0.305
Pteropus alecto	Chiroptera	Airborne	extant	0.6721
Pteropus anetianus	Chiroptera	Airborne	extant	0.426
Pteropus brunneus	Chiroptera	Airborne	extant	0.2
Pteropus caniceps	Chiroptera	Airborne	extant	0.505
Pteropus chrysoproctus	Chiroptera	Airborne	extant	0.71
Pteropus conspicillatus	Chiroptera	Airborne	extant	0.7757
Pteropus dasymallus	Chiroptera	Airborne	extant	0.435
Pteropus fundatus	Chiroptera	Airborne	extant	0.2057
Pteropus giganteus	Chiroptera	Airborne	extant	0.8042
Pteropus gilliardi	Chiroptera	Airborne	extant	0.4
Pteropus griseus	Chiroptera	Airborne	extant	0.269
Pteropus howensis	Chiroptera	Airborne	extant	0.2329
Pteropus hypomelanus	Chiroptera	Airborne	extant	0.43
Pteropus leucopterus	Chiroptera	Airborne	extant	0.34
Pteropus livingstonei	Chiroptera	Airborne	extant	0.6965
Pteropus lombocensis	Chiroptera	Airborne	extant	0.2503
Pteropus lylei	Chiroptera	Airborne	extant	0.3167
Pteropus macrotis	Chiroptera	Airborne	extant	0.357
Pteropus mahaganus	Chiroptera	Airborne	extant	0.2514
Pteropus mariannus	Chiroptera	Airborne	extant	0.4535
Pteropus melanopogon	Chiroptera	Airborne	extant	0.86
Pteropus neohibernicus	Chiroptera	Airborne	extant	0.9668
Pteropus niger	Chiroptera	Airborne	extant	0.4563
Pteropus nitendiensis	Chiroptera	Airborne	extant	0.265
Pteropus ocularis	Chiroptera	Airborne	extant	0.22
Pteropus ornatus	Chiroptera	Airborne	extant	0.33
Pteropus personatus	Chiroptera	Airborne	extant	0.1275
Pteropus pohlei	Chiroptera	Airborne	extant	0.343
Pteropus poliocephalus	Chiroptera	Airborne	extant	0.7499
Pteropus pumilus	Chiroptera	Airborne	extant	0.1834
Pteropus rayneri	Chiroptera	Airborne	extant	0.7245
Pteropus rodricensis	Chiroptera	Airborne	extant	0.2538
Pteropus rufus	Chiroptera	Airborne	extant	0.361
Pteropus samoensis	Chiroptera	Airborne	extant	0.31
Pteropus scapulatus	Chiroptera	Airborne	extant	0.4434
Pteropus seychellensis	Chiroptera	Airborne	extant	0.457
Pteropus temmincki	Chiroptera	Airborne	extant	0.25
Pteropus tokudae	Chiroptera	Airborne	extant	0.152
Pteropus tonganus	Chiroptera	Airborne	extant	0.4183
Pteropus vampyrus	Chiroptera	Airborne	extant	1.0393
Pteropus vetulus	Chiroptera	Airborne	extant	0.148
Pteropus voeltzkowi	Chiroptera	Airborne	extant	0.5275
Pteropus woodfordi	Chiroptera	Airborne	extant	0.1193
Pygoderma bilabiatum	Chiroptera	Airborne	extant	0.0185
Rhinolophus acuminatus	Chiroptera	Airborne	extant	0.0118
Rhinolophus affinis	Chiroptera	Airborne	extant	0.014
Rhinolophus alcyone	Chiroptera	Airborne	extant	0.0188
Rhinolophus arcuatus	Chiroptera	Airborne	extant	0.0088
Rhinolophus blasii	Chiroptera	Airborne	extant	0.0097
Rhinolophus capensis	Chiroptera	Airborne	extant	0.0128
Rhinolophus clivosus	Chiroptera	Airborne	extant	0.0157
Rhinolophus coelophyllus	Chiroptera	Airborne	extant	0.0071
Rhinolophus cornutus	Chiroptera	Airborne	extant	0.0072
Rhinolophus darlingi	Chiroptera	Airborne	extant	0.0095
Rhinolophus denti	Chiroptera	Airborne	extant	0.0062
Rhinolophus eloquens	Chiroptera	Airborne	extant	0.0191
Rhinolophus euryale	Chiroptera	Airborne	extant	0.0082
Rhinolophus euryotis	Chiroptera	Airborne	extant	0.0143
Rhinolophus ferrumequinum	Chiroptera	Airborne	extant	0.0211
Rhinolophus fumigatus	Chiroptera	Airborne	extant	0.0129
Rhinolophus hildebrandti	Chiroptera	Airborne	extant	0.0258
Rhinolophus hipposideros	Chiroptera	Airborne	extant	0.0047
Rhinolophus inops	Chiroptera	Airborne	extant	0.0135
Rhinolophus landeri	Chiroptera	Airborne	extant	0.0089
Rhinolophus lepidus	Chiroptera	Airborne	extant	0.0057
Rhinolophus luctus	Chiroptera	Airborne	extant	0.0339
Rhinolophus maclaudi	Chiroptera	Airborne	extant	0.0131
Rhinolophus macrotis	Chiroptera	Airborne	extant	0.0062
Rhinolophus malayanus	Chiroptera	Airborne	extant	0.0067
Rhinolophus marshalli	Chiroptera	Airborne	extant	0.005
Rhinolophus megaphyllus	Chiroptera	Airborne	extant	0.0101
Rhinolophus mehelyi	Chiroptera	Airborne	extant	0.0123
Rhinolophus paradoxolophus	Chiroptera	Airborne	extant	0.0082
Rhinolophus pearsoni	Chiroptera	Airborne	extant	0.0118
Rhinolophus philippinensis	Chiroptera	Airborne	extant	0.0107
Rhinolophus pusillus	Chiroptera	Airborne	extant	0.0052
Rhinolophus robinsoni	Chiroptera	Airborne	extant	0.0085
Rhinolophus rouxi	Chiroptera	Airborne	extant	0.0118
Rhinolophus rufus	Chiroptera	Airborne	extant	0.03
Rhinolophus sedulus	Chiroptera	Airborne	extant	0.0088
Rhinolophus shameli	Chiroptera	Airborne	extant	0.0096
Rhinolophus simplex	Chiroptera	Airborne	extant	0.0062
Rhinolophus simulator	Chiroptera	Airborne	extant	0.0081
Rhinolophus stheno	Chiroptera	Airborne	extant	0.0079
Rhinolophus swinnyi	Chiroptera	Airborne	extant	0.0071
Rhinolophus thomasi	Chiroptera	Airborne	extant	0.0083
Rhinolophus trifoliatus	Chiroptera	Airborne	extant	0.0148
Rhinolophus virgo	Chiroptera	Airborne	extant	0.006
Rhinolophus yunanensis	Chiroptera	Airborne	extant	0.0197
Rhinonicteris aurantia	Chiroptera	Airborne	extant	0.0088
Rhinophylla pumilio	Chiroptera	Airborne	extant	0.0096
Rhinopoma hardwickei	Chiroptera	Airborne	extant	0.0142
Rhinopoma microphyllum	Chiroptera	Airborne	extant	0.0279
Rhinopoma muscatellum	Chiroptera	Airborne	extant	0.0091
Rhogeesa minutilla	Chiroptera	Airborne	extant	0.0037
Rhogeesa parvula	Chiroptera	Airborne	extant	0.0044
Rhogeesa tumida	Chiroptera	Airborne	extant	0.0045
Rhynchonycteris naso	Chiroptera	Airborne	extant	0.0042
Rousettus aegyptiacus	Chiroptera	Airborne	extant	0.1322
Rousettus amplexicaudatus	Chiroptera	Airborne	extant	0.0789
Rousettus angolensis	Chiroptera	Airborne	extant	0.0746
Rousettus celebensis	Chiroptera	Airborne	extant	0.0563
Rousettus lanosus	Chiroptera	Airborne	extant	0.103
Rousettus leschenaulti	Chiroptera	Airborne	extant	0.0971
Rousettus madagascariensis	Chiroptera	Airborne	extant	0.0621
Rousettus obliviosus	Chiroptera	Airborne	extant	0.0441
Rousettus spinalatus	Chiroptera	Airborne	extant	0.0908
Saccolaimus flaviventris	Chiroptera	Airborne	extant	0.045
Saccolaimus peli	Chiroptera	Airborne	extant	0.1
Saccolaimus saccolaimus	Chiroptera	Airborne	extant	0.0437
Saccopteryx bilineata	Chiroptera	Airborne	extant	0.0081
Saccopteryx canescens	Chiroptera	Airborne	extant	0.0034
Saccopteryx leptura	Chiroptera	Airborne	extant	0.0049
Scotoecus albofuscus	Chiroptera	Airborne	extant	0.0045
Scotoecus hirundo	Chiroptera	Airborne	extant	0.0093
Scotomanes ornatus	Chiroptera	Airborne	extant	0.0218
Scotonycteris ophiodon	Chiroptera	Airborne	extant	0.0675
Scotonycteris zenkeri	Chiroptera	Airborne	extant	0.0208
Scotophilus borbonicus	Chiroptera	Airborne	extant	0.018
Scotophilus dinganii	Chiroptera	Airborne	extant	0.0251
Scotophilus heathi	Chiroptera	Airborne	extant	0.0346
Scotophilus kuhlii	Chiroptera	Airborne	extant	0.023
Scotophilus leucogaster	Chiroptera	Airborne	extant	0.0202
Scotophilus nigrita	Chiroptera	Airborne	extant	0.101
Scotophilus nux	Chiroptera	Airborne	extant	0.03
Scotophilus viridis	Chiroptera	Airborne	extant	0.0196
Sphaerias blanfordi	Chiroptera	Airborne	extant	0.0282
Sphaeronycteris toxophyllum	Chiroptera	Airborne	extant	0.0162
Stenoderma rufum	Chiroptera	Airborne	extant	0.0207
Sturnira aratathomasi	Chiroptera	Airborne	extant	0.0486
Sturnira bidens	Chiroptera	Airborne	extant	0.0176
Sturnira bogotensis	Chiroptera	Airborne	extant	0.0208
Sturnira erythromos	Chiroptera	Airborne	extant	0.0151
Sturnira lilium	Chiroptera	Airborne	extant	0.0191
Sturnira ludovici	Chiroptera	Airborne	extant	0.021
Sturnira tildae	Chiroptera	Airborne	extant	0.024
Styloctenium wallacei	Chiroptera	Airborne	extant	0.173
Syconycteris australis	Chiroptera	Airborne	extant	0.0171
Syconycteris carolinae	Chiroptera	Airborne	extant	0.039
Syconycteris hobbit	Chiroptera	Airborne	extant	0.0183
Tadarida aegyptiaca	Chiroptera	Airborne	extant	0.0168
Tadarida australis	Chiroptera	Airborne	extant	0.0318
Tadarida brasiliensis	Chiroptera	Airborne	extant	0.0125
Tadarida fulminans	Chiroptera	Airborne	extant	0.0353
Tadarida teniotis	Chiroptera	Airborne	extant	0.027
Taphozous australis	Chiroptera	Airborne	extant	0.0229
Taphozous georgianus	Chiroptera	Airborne	extant	0.0277
Taphozous hildegardeae	Chiroptera	Airborne	extant	0.0296
Taphozous hilli	Chiroptera	Airborne	extant	0.022
Taphozous kapalgensis	Chiroptera	Airborne	extant	0.026
Taphozous longimanus	Chiroptera	Airborne	extant	0.0269
Taphozous mauritianus	Chiroptera	Airborne	extant	0.0273
Taphozous melanopogon	Chiroptera	Airborne	extant	0.0276
Taphozous nudiventris	Chiroptera	Airborne	extant	0.0341
Taphozous perforatus	Chiroptera	Airborne	extant	0.0273
Taphozous philippinensis	Chiroptera	Airborne	extant	0.0203
Taphozous theobaldi	Chiroptera	Airborne	extant	0.0398
Thoopterus nigrescens	Chiroptera	Airborne	extant	0.0604
Thyroptera discifera	Chiroptera	Airborne	extant	0.0031
Thyroptera tricolor	Chiroptera	Airborne	extant	0.0044
Tonatia bidens	Chiroptera	Airborne	extant	0.0278
Tonatia brasiliense	Chiroptera	Airborne	extant	0.0094
Tonatia carrikeri	Chiroptera	Airborne	extant	0.0209
Tonatia evotis	Chiroptera	Airborne	extant	0.0198
Tonatia schulzi	Chiroptera	Airborne	extant	0.0182
Tonatia silvicola	Chiroptera	Airborne	extant	0.0297
Trachops cirrhosus	Chiroptera	Airborne	extant	0.0377
Triaenops persicus	Chiroptera	Airborne	extant	0.0126
Tylonycteris pachypus	Chiroptera	Airborne	extant	0.0036
Tylonycteris robustula	Chiroptera	Airborne	extant	0.0077
Uroderma bilobatum	Chiroptera	Airborne	extant	0.0166
Uroderma magnirostrum	Chiroptera	Airborne	extant	0.0169
Vampyressa bidens	Chiroptera	Airborne	extant	0.0116
Vampyressa melissa	Chiroptera	Airborne	extant	0.0163
Vampyressa pusilla	Chiroptera	Airborne	extant	0.0086
Vampyrodes caraccioli	Chiroptera	Airborne	extant	0.0347
Vampyrum spectrum	Chiroptera	Airborne	extant	0.1694
Vespertilio murinus	Chiroptera	Airborne	extant	0.0187
Vespertilio superans	Chiroptera	Airborne	extant	0.0245
Antechinus bellus	Dasyuromorphia	Not relevant	extant	0.0445
Antechinus flavipes	Dasyuromorphia	Not relevant	extant	0.045
Antechinus godmani	Dasyuromorphia	Not relevant	extant	0.0765
Antechinus leo	Dasyuromorphia	Not relevant	extant	0.074
Antechinus melanurus	Dasyuromorphia	Not relevant	extant	0.0478
Antechinus minimus	Dasyuromorphia	Not relevant	extant	0.0535
Antechinus naso	Dasyuromorphia	Not relevant	extant	0.0484
Antechinus stuartii	Dasyuromorphia	Not relevant	extant	0.0275
Antechinus swainsonii	Dasyuromorphia	Not relevant	extant	0.053
Dasycercus byrnei	Dasyuromorphia	Not relevant	extant	0.1038
Dasycercus cristicauda	Dasyuromorphia	Not relevant	extant	0.1
Dasykaluta rosamondae	Dasyuromorphia	Not relevant	extant	0.0288
Dasyurus albopunctatus	Dasyuromorphia	Not relevant	extant	0.637
Dasyurus geoffroii	Dasyuromorphia	Not relevant	extant	1.1
Dasyurus hallucatus	Dasyuromorphia	Not relevant	extant	0.525
Dasyurus maculatus	Dasyuromorphia	Not relevant	extant	5.5
Dasyurus viverrinus	Dasyuromorphia	Not relevant	extant	1.09
Murexia longicaudata	Dasyuromorphia	Not relevant	extant	0.434
Murexia rothschildi	Dasyuromorphia	Not relevant	extant	0.0438
Myoictis melas	Dasyuromorphia	Not relevant	extant	0.2
Myrmecobius fasciatus	Dasyuromorphia	Not relevant	extant	0.4715
Neophascogale lorentzi	Dasyuromorphia	Not relevant	extant	0.212
Ningaui ridei	Dasyuromorphia	Not relevant	extant	0.0085
Ningaui timealeyi	Dasyuromorphia	Not relevant	extant	0.0057
Ningaui yvonnae	Dasyuromorphia	Not relevant	extant	0.007
Parantechinus apicalis	Dasyuromorphia	Not relevant	extant	0.0688
Parantechinus bilarni	Dasyuromorphia	Not relevant	extant	0.0275
Phascogale calura	Dasyuromorphia	Not relevant	extant	0.0515
Phascogale tapoatafa	Dasyuromorphia	Not relevant	extant	0.1935
Phascolosorex dorsalis	Dasyuromorphia	Not relevant	extant	0.1385
Planigale gilesi	Dasyuromorphia	Not relevant	extant	0.0092
Planigale ingrami	Dasyuromorphia	Not relevant	extant	0.0043
Planigale maculata	Dasyuromorphia	Not relevant	extant	0.011
Planigale novaeguineae	Dasyuromorphia	Not relevant	extant	0.0149
Planigale tenuirostris	Dasyuromorphia	Not relevant	extant	0.0061
Pseudantechinus macdonnellensis	Dasyuromorphia	Not relevant	extant	0.0325
Pseudantechinus ningbing	Dasyuromorphia	Not relevant	extant	0.02
Pseudantechinus woolleyae	Dasyuromorphia	Not relevant	extant	0.04
Sarcophilus harrisii	Dasyuromorphia	Not relevant	extant	10
Sminthopsis aitkeni	Dasyuromorphia	Not relevant	extant	0.0225
Sminthopsis archeri	Dasyuromorphia	Not relevant	extant	0.016
Sminthopsis butleri	Dasyuromorphia	Not relevant	extant	0.025
Sminthopsis crassicaudata	Dasyuromorphia	Not relevant	extant	0.015
Sminthopsis dolichura	Dasyuromorphia	Not relevant	extant	0.0136
Sminthopsis douglasi	Dasyuromorphia	Not relevant	extant	0.055
Sminthopsis gilberti	Dasyuromorphia	Not relevant	extant	0.0195
Sminthopsis granulipes	Dasyuromorphia	Not relevant	extant	0.025
Sminthopsis griseoventer	Dasyuromorphia	Not relevant	extant	0.0175
Sminthopsis hirtipes	Dasyuromorphia	Not relevant	extant	0.015
Sminthopsis laniger	Dasyuromorphia	Not relevant	extant	0.025
Sminthopsis leucopus	Dasyuromorphia	Not relevant	extant	0.026
Sminthopsis longicaudata	Dasyuromorphia	Not relevant	extant	0.018
Sminthopsis macroura	Dasyuromorphia	Not relevant	extant	0.02
Sminthopsis murina	Dasyuromorphia	Not relevant	extant	0.017
Sminthopsis ooldea	Dasyuromorphia	Not relevant	extant	0.011
Sminthopsis psammophila	Dasyuromorphia	Not relevant	extant	0.0335
Sminthopsis virginiae	Dasyuromorphia	Not relevant	extant	0.0353
Sminthopsis youngsoni	Dasyuromorphia	Not relevant	extant	0.0101
Thylacinus cynocephalus	Dasyuromorphia	Not relevant	extant	30
Cynocephalus variegatus	Dermoptera	Airborne	extant	1.0125
Cynocephalus volans	Dermoptera	Airborne	extant	1.25
Caluromys derbianus	Didelphimorphia	Not relevant	extant	0.297
Caluromys lanatus	Didelphimorphia	Not relevant	extant	0.325
Caluromys philander	Didelphimorphia	Not relevant	extant	0.2293
Caluromysiops irrupta	Didelphimorphia	Not relevant	extant	0.25
Chironectes minimus	Didelphimorphia	Not relevant	extant	0.946
Didelphis albiventris	Didelphimorphia	Not relevant	extant	0.904
Didelphis aurita	Didelphimorphia	Not relevant	extant	1.164
Didelphis marsupialis	Didelphimorphia	Not relevant	extant	1.0912
Didelphis virginiana	Didelphimorphia	Not relevant	extant	2.1955
Glironia venusta	Didelphimorphia	Not relevant	extant	0.114
Gracilinanus aceramarcae	Didelphimorphia	Not relevant	extant	0.0205
Gracilinanus agilis	Didelphimorphia	Not relevant	extant	0.022
Gracilinanus dryas	Didelphimorphia	Not relevant	extant	0.018
Gracilinanus emiliae	Didelphimorphia	Not relevant	extant	0.0076
Gracilinanus marica	Didelphimorphia	Not relevant	extant	0.0238
Gracilinanus microtarsus	Didelphimorphia	Not relevant	extant	0.031
Lestodelphys halli	Didelphimorphia	Not relevant	extant	0.076
Lutreolina crassicaudata	Didelphimorphia	Not relevant	extant	0.5373
Marmosa andersoni	Didelphimorphia	Not relevant	extant	0.0474
Marmosa canescens	Didelphimorphia	Not relevant	extant	0.06
Marmosa lepida	Didelphimorphia	Not relevant	extant	0.014
Marmosa mexicana	Didelphimorphia	Not relevant	extant	0.0495
Marmosa murina	Didelphimorphia	Not relevant	extant	0.026
Marmosa robinsoni	Didelphimorphia	Not relevant	extant	0.0567
Marmosa rubra	Didelphimorphia	Not relevant	extant	0.063
Marmosa tyleriana	Didelphimorphia	Not relevant	extant	0.0324
Marmosa xerophila	Didelphimorphia	Not relevant	extant	0.0462
Marmosops cracens	Didelphimorphia	Not relevant	extant	0.0255
Marmosops dorothea	Didelphimorphia	Not relevant	extant	0.0375
Marmosops fuscatus	Didelphimorphia	Not relevant	extant	0.06
Marmosops handleyi	Didelphimorphia	Not relevant	extant	0.0307
Marmosops impavidus	Didelphimorphia	Not relevant	extant	0.0405
Marmosops incanus	Didelphimorphia	Not relevant	extant	0.0623
Marmosops invictus	Didelphimorphia	Not relevant	extant	0.0292
Marmosops noctivagus	Didelphimorphia	Not relevant	extant	0.021
Marmosops parvidens	Didelphimorphia	Not relevant	extant	0.015
Metachirus nudicaudatus	Didelphimorphia	Not relevant	extant	0.375
Micoureus alstoni	Didelphimorphia	Not relevant	extant	0.1323
Micoureus constantiae	Didelphimorphia	Not relevant	extant	0.09
Micoureus demerarae	Didelphimorphia	Not relevant	extant	0.0758
Micoureus regina	Didelphimorphia	Not relevant	extant	0.1186
Monodelphis adusta	Didelphimorphia	Not relevant	extant	0.035
Monodelphis americana	Didelphimorphia	Not relevant	extant	0.0195
Monodelphis brevicaudata	Didelphimorphia	Not relevant	extant	0.0696
Monodelphis dimidiata	Didelphimorphia	Not relevant	extant	0.058
Monodelphis domestica	Didelphimorphia	Not relevant	extant	0.0714
Monodelphis emiliae	Didelphimorphia	Not relevant	extant	0.04
Monodelphis iheringi	Didelphimorphia	Not relevant	extant	0.112
Monodelphis kunsi	Didelphimorphia	Not relevant	extant	0.0113
Monodelphis osgoodi	Didelphimorphia	Not relevant	extant	0.112
Monodelphis rubida	Didelphimorphia	Not relevant	extant	0.0455
Monodelphis scalops	Didelphimorphia	Not relevant	extant	0.741
Monodelphis sorex	Didelphimorphia	Not relevant	extant	0.048
Monodelphis theresa	Didelphimorphia	Not relevant	extant	0.112
Monodelphis unistriata	Didelphimorphia	Not relevant	extant	0.0553
Philander andersoni	Didelphimorphia	Not relevant	extant	0.325
Philander opossum	Didelphimorphia	Not relevant	extant	0.5855
Thylamys elegans	Didelphimorphia	Not relevant	extant	0.0289
Thylamys macrura	Didelphimorphia	Not relevant	extant	0.0207
Thylamys pallidior	Didelphimorphia	Not relevant	extant	0.0149
Thylamys pusilla	Didelphimorphia	Not relevant	extant	0.041
Thylamys velutinus	Didelphimorphia	Not relevant	extant	0.0207
Acrobates pygmaeus	Diprotodontia	Not relevant	extant	0.012
Aepyprymnus rufescens	Diprotodontia	Not relevant	extant	3.25
Ailurops ursinus	Diprotodontia	Not relevant	extant	10
Bettongia gaimardi	Diprotodontia	Not relevant	extant	1.66
Bettongia lesueur	Diprotodontia	Not relevant	extant	1.5
Bettongia penicillata	Diprotodontia	Not relevant	extant	1.3
Burramys parvus	Diprotodontia	Not relevant	extant	0.0415
Caloprymnus campestris	Diprotodontia	Not relevant	extant	0.9
Cercartetus caudatus	Diprotodontia	Not relevant	extant	0.025
Cercartetus concinnus	Diprotodontia	Not relevant	extant	0.013
Cercartetus lepidus	Diprotodontia	Not relevant	extant	0.007
Cercartetus nanus	Diprotodontia	Not relevant	extant	0.024
Dactylopsila palpator	Diprotodontia	Not relevant	extant	0.398
Dactylopsila tatei	Diprotodontia	Not relevant	extant	0.252
Dactylopsila trivirgata	Diprotodontia	Not relevant	extant	0.41355
Dendrolagus bennettianus	Diprotodontia	Not relevant	extant	10.95
Dendrolagus dorianus	Diprotodontia	Not relevant	extant	9.581
Dendrolagus goodfellowi	Diprotodontia	Not relevant	extant	8.025
Dendrolagus inustus	Diprotodontia	Not relevant	extant	13.0312
Dendrolagus lumholtzi	Diprotodontia	Not relevant	extant	6.75
Dendrolagus matschiei	Diprotodontia	Not relevant	extant	6.96
Dendrolagus scottae	Diprotodontia	Not relevant	extant	10.375
Dendrolagus spadix	Diprotodontia	Not relevant	extant	9.1
Dendrolagus spp.	Diprotodontia	Not relevant	extant	8.75
Dendrolagus ursinus	Diprotodontia	Not relevant	extant	13.25
Distoechurus pennatus	Diprotodontia	Not relevant	extant	0.0441
Dorcopsis atrata	Diprotodontia	Not relevant	extant	5.9165
Dorcopsis hageni	Diprotodontia	Not relevant	extant	5.5
Dorcopsis luctuosa	Diprotodontia	Not relevant	extant	6.352
Dorcopsis muelleri	Diprotodontia	Not relevant	extant	5.5
Dorcopsulus macleayi	Diprotodontia	Not relevant	extant	2.988
Dorcopsulus vanheurni	Diprotodontia	Not relevant	extant	1.8215
Gymnobelideus leadbeateri	Diprotodontia	Not relevant	extant	0.127
Hemibelideus lemuroides	Diprotodontia	Not relevant	extant	0.9525
Hypsiprymnodon moschatus	Diprotodontia	Not relevant	extant	0.52
Lagorchestes asomatus	Diprotodontia	Not relevant	extant	1.5
Lagorchestes conspicillatus	Diprotodontia	Not relevant	extant	3.05
Lagorchestes hirsutus	Diprotodontia	Not relevant	extant	1.265
Lagorchestes leporides	Diprotodontia	Not relevant	extant	3
Lagostrophus fasciatus	Diprotodontia	Not relevant	extant	1.7
Lasiorhinus krefftii	Diprotodontia	Not relevant	extant	2.9
Lasiorhinus latifrons	Diprotodontia	Not relevant	extant	25.5
Macropus agilis	Diprotodontia	Not relevant	extant	15
Macropus antilopinus	Diprotodontia	Not relevant	extant	27.25
Macropus bernardus	Diprotodontia	Not relevant	extant	17
Macropus dorsalis	Diprotodontia	Not relevant	extant	11.25
Macropus eugenii	Diprotodontia	Not relevant	extant	6.5
Macropus fuliginosus	Diprotodontia	Not relevant	extant	22
Macropus giganteus	Diprotodontia	Not relevant	extant	25.875
Macropus greyi	Diprotodontia	Not relevant	extant	10
Macropus irma	Diprotodontia	Not relevant	extant	8
Macropus parma	Diprotodontia	Not relevant	extant	4.5
Macropus parryi	Diprotodontia	Not relevant	extant	13.5
Macropus robustus	Diprotodontia	Not relevant	extant	21.2625
Macropus rufogriseus	Diprotodontia	Not relevant	extant	16.85
Macropus rufus	Diprotodontia	Not relevant	extant	46.25
Onychogalea fraenata	Diprotodontia	Not relevant	extant	5.5
Onychogalea lunata	Diprotodontia	Not relevant	extant	3.5
Onychogalea unguifera	Diprotodontia	Not relevant	extant	6.65
Petauroides volans	Diprotodontia	Not relevant	extant	1.3
Petaurus abidi	Diprotodontia	Not relevant	extant	0.278
Petaurus australis	Diprotodontia	Not relevant	extant	0.575
Petaurus breviceps	Diprotodontia	Not relevant	extant	0.1063
Petaurus gracilis	Diprotodontia	Not relevant	extant	0.353
Petaurus norfolcensis	Diprotodontia	Not relevant	extant	0.23
Petrogale assimilis	Diprotodontia	Not relevant	extant	4.5
Petrogale brachyotis	Diprotodontia	Not relevant	extant	4.05
Petrogale burbidgei	Diprotodontia	Not relevant	extant	1.258
Petrogale concinna	Diprotodontia	Not relevant	extant	1.4
Petrogale godmani	Diprotodontia	Not relevant	extant	4.75
Petrogale inornata	Diprotodontia	Not relevant	extant	4.6
Petrogale lateralis	Diprotodontia	Not relevant	extant	4.625
Petrogale penicillata	Diprotodontia	Not relevant	extant	7.1
Petrogale persephone	Diprotodontia	Not relevant	extant	6.2
Petrogale rothschildi	Diprotodontia	Not relevant	extant	3.4
Petrogale xanthopus	Diprotodontia	Not relevant	extant	8.5
Petropseudes dahli	Diprotodontia	Not relevant	extant	1.64
Phalanger carmelitae	Diprotodontia	Not relevant	extant	2.0475
Phalanger intercastellanus	Diprotodontia	Not relevant	extant	1.7475
Phalanger lullulae	Diprotodontia	Not relevant	extant	1.6325
Phalanger matanim	Diprotodontia	Not relevant	extant	1.55
Phalanger orientalis	Diprotodontia	Not relevant	extant	2.16875
Phalanger ornatus	Diprotodontia	Not relevant	extant	1.7875
Phalanger rothschildi	Diprotodontia	Not relevant	extant	1.365
Phalanger sericeus	Diprotodontia	Not relevant	extant	2.003
Phalanger vestitus	Diprotodontia	Not relevant	extant	1.85
Phascolarctos cinereus	Diprotodontia	Not relevant	extant	10.25
Potorous longipes	Diprotodontia	Not relevant	extant	1.9
Potorous platyops	Diprotodontia	Not relevant	extant	0.5
Potorous tridactylus	Diprotodontia	Not relevant	extant	1.1
Pseudocheirus canescens	Diprotodontia	Not relevant	extant	0.3
Pseudocheirus caroli	Diprotodontia	Not relevant	extant	0.44
Pseudocheirus forbesi	Diprotodontia	Not relevant	extant	0.649
Pseudocheirus herbertensis	Diprotodontia	Not relevant	extant	1.115
Pseudocheirus mayeri	Diprotodontia	Not relevant	extant	0.1518
Pseudocheirus peregrinus	Diprotodontia	Not relevant	extant	0.9
Pseudocheirus schlegeli	Diprotodontia	Not relevant	extant	0.2745
Pseudochirops albertisii	Diprotodontia	Not relevant	extant	0.7849
Pseudochirops archeri	Diprotodontia	Not relevant	extant	1.0915
Pseudochirops corinnae	Diprotodontia	Not relevant	extant	1.123
Pseudochirops coronatus	Diprotodontia	Not relevant	extant	1.5
Pseudochirops cupreus	Diprotodontia	Not relevant	extant	1.7245
Setonix brachyurus	Diprotodontia	Not relevant	extant	3.25
Spilocuscus maculatus	Diprotodontia	Not relevant	extant	5.10675
Spilocuscus rufoniger	Diprotodontia	Not relevant	extant	6
Strigocuscus gymnotis	Diprotodontia	Not relevant	extant	2.705
Tarsipes rostratus	Diprotodontia	Not relevant	extant	0.009
Thylogale billardierii	Diprotodontia	Not relevant	extant	5.45
Thylogale browni	Diprotodontia	Not relevant	extant	5.478
Thylogale stigmatica	Diprotodontia	Not relevant	extant	4.6
Thylogale thetis	Diprotodontia	Not relevant	extant	5.4
Trichosurus arnhemensis	Diprotodontia	Not relevant	extant	1.3
Trichosurus caninus	Diprotodontia	Not relevant	extant	3.5
Trichosurus vulpecula	Diprotodontia	Not relevant	extant	2.65
Vombatus ursinus	Diprotodontia	Not relevant	extant	26
Wallabia bicolor	Diprotodontia	Not relevant	extant	15
Wyulda squamicaudata	Diprotodontia	Not relevant	extant	1.675
Dendrohyrax arboreus	Hyracoidea	Herbivore	extant	2.95
Dendrohyrax dorsalis	Hyracoidea	Herbivore	extant	3.175
Dendrohyrax validus	Hyracoidea	Herbivore	extant	2.43
Heterohyrax brucei	Hyracoidea	Herbivore	extant	2.625
Procavia capensis	Hyracoidea	Herbivore	extant	3.03
Amblysomus hottentotus	Insectivora	Not relevant	extant	0.0679
Amblysomus iris	Insectivora	Not relevant	extant	0.044
Amblysomus julianae	Insectivora	Not relevant	extant	0.022
Anourosorex squamipes	Insectivora	Not relevant	extant	0.02
Atelerix albiventris	Insectivora	Not relevant	extant	0.6
Atelerix algirus	Insectivora	Not relevant	extant	1.25
Atelerix frontalis	Insectivora	Not relevant	extant	0.3095
Blarina brevicauda	Insectivora	Not relevant	extant	0.028
Blarina carolinensis	Insectivora	Not relevant	extant	0.0135
Blarina hylophaga	Insectivora	Not relevant	extant	0.0145
Blarinella quadraticauda	Insectivora	Not relevant	extant	0.0125
Calcochloris obtusirostris	Insectivora	Not relevant	extant	0.0241
Chimarrogale hantu	Insectivora	Not relevant	extant	0.055
Chimarrogale himalayica	Insectivora	Not relevant	extant	0.0375
Chimarrogale platycephala	Insectivora	Not relevant	extant	0.032
Chlorotalpa arendsi	Insectivora	Not relevant	extant	0.0524
Chlorotalpa sclateri	Insectivora	Not relevant	extant	0.042
Chrysochloris asiatica	Insectivora	Not relevant	extant	0.049
Chrysochloris stuhlmanni	Insectivora	Not relevant	extant	0.0398
Chrysospalax trevelyani	Insectivora	Not relevant	extant	0.4265
Chrysospalax villosus	Insectivora	Not relevant	extant	0.1199
Condylura cristata	Insectivora	Not relevant	extant	0.084
Crocidura beatus	Insectivora	Not relevant	extant	0.0106
Crocidura bottegi	Insectivora	Not relevant	extant	0.0035
Crocidura canariensis	Insectivora	Not relevant	extant	0.0075
Crocidura crossei	Insectivora	Not relevant	extant	0.008
Crocidura cyanea	Insectivora	Not relevant	extant	0.0091
Crocidura denti	Insectivora	Not relevant	extant	0.007
Crocidura dolichura	Insectivora	Not relevant	extant	0.0055
Crocidura douceti	Insectivora	Not relevant	extant	0.0043
Crocidura elgonius	Insectivora	Not relevant	extant	0.0065
Crocidura flavescens	Insectivora	Not relevant	extant	0.0285
Crocidura foxi	Insectivora	Not relevant	extant	0.021
Crocidura fuliginosa	Insectivora	Not relevant	extant	0.012
Crocidura fulvastra	Insectivora	Not relevant	extant	0.01
Crocidura fumosa	Insectivora	Not relevant	extant	0.0145
Crocidura fuscomurina	Insectivora	Not relevant	extant	0.0058
Crocidura gracilipes	Insectivora	Not relevant	extant	0.0067
Crocidura grandiceps	Insectivora	Not relevant	extant	0.023
Crocidura grayi	Insectivora	Not relevant	extant	0.0103
Crocidura hildegardeae	Insectivora	Not relevant	extant	0.0095
Crocidura hirta	Insectivora	Not relevant	extant	0.0158
Crocidura jacksoni	Insectivora	Not relevant	extant	0.007
Crocidura leucodon	Insectivora	Not relevant	extant	0.0098
Crocidura littoralis	Insectivora	Not relevant	extant	0.016
Crocidura longipes	Insectivora	Not relevant	extant	0.0193
Crocidura luna	Insectivora	Not relevant	extant	0.0145
Crocidura lusitania	Insectivora	Not relevant	extant	0.002
Crocidura maquassiensis	Insectivora	Not relevant	extant	0.006
Crocidura mariquensis	Insectivora	Not relevant	extant	0.0103
Crocidura maurisca	Insectivora	Not relevant	extant	0.014
Crocidura monax	Insectivora	Not relevant	extant	0.016
Crocidura montis	Insectivora	Not relevant	extant	0.0145
Crocidura nanilla	Insectivora	Not relevant	extant	0.0065
Crocidura nigeriae	Insectivora	Not relevant	extant	0.023
Crocidura nigricans	Insectivora	Not relevant	extant	0.02
Crocidura niobe	Insectivora	Not relevant	extant	0.016
Crocidura olivieri	Insectivora	Not relevant	extant	0.0508
Crocidura pasha	Insectivora	Not relevant	extant	0.0065
Crocidura planiceps	Insectivora	Not relevant	extant	0.0025
Crocidura poensis	Insectivora	Not relevant	extant	0.0167
Crocidura raineyi	Insectivora	Not relevant	extant	0.0145
Crocidura religiosa	Insectivora	Not relevant	extant	0.007
Crocidura russula	Insectivora	Not relevant	extant	0.0082
Crocidura silacea	Insectivora	Not relevant	extant	0.007
Crocidura somalica	Insectivora	Not relevant	extant	0.0115
Crocidura suaveolens	Insectivora	Not relevant	extant	0.00526667
Crocidura tarfayensis	Insectivora	Not relevant	extant	0.0065
Crocidura theresae	Insectivora	Not relevant	extant	0.0176
Crocidura turba	Insectivora	Not relevant	extant	0.0145
Crocidura ultima	Insectivora	Not relevant	extant	0.016
Crocidura usambarae	Insectivora	Not relevant	extant	0.0097
Crocidura viaria	Insectivora	Not relevant	extant	0.017
Crocidura whitakeri	Insectivora	Not relevant	extant	0.0055
Crocidura wimmeri	Insectivora	Not relevant	extant	0.0235
Crocidura yankariensis	Insectivora	Not relevant	extant	0.005
Crocidura zimmeri	Insectivora	Not relevant	extant	0.0145
Cryptotis avia	Insectivora	Not relevant	extant	0.011
Cryptotis goldmani	Insectivora	Not relevant	extant	0.008
Cryptotis goodwini	Insectivora	Not relevant	extant	0.007
Cryptotis magna	Insectivora	Not relevant	extant	0.007
Cryptotis meridensis	Insectivora	Not relevant	extant	0.012
Cryptotis mexicana	Insectivora	Not relevant	extant	0.007
Cryptotis montivaga	Insectivora	Not relevant	extant	0.0113
Cryptotis nigrescens	Insectivora	Not relevant	extant	0.00845
Cryptotis parva	Insectivora	Not relevant	extant	0.005
Cryptotis squamipes	Insectivora	Not relevant	extant	0.011
Cryptotis thomasi	Insectivora	Not relevant	extant	0.0126
Desmana moschata	Insectivora	Not relevant	extant	0.383
Diplomesodon pulchellum	Insectivora	Not relevant	extant	0.011
Echinops telfairi	Insectivora	Not relevant	extant	0.13275
Echinosorex gymnura	Insectivora	Not relevant	extant	0.957
Eremitalpa granti	Insectivora	Not relevant	extant	0.0261
Erinaceus concolor	Insectivora	Not relevant	extant	0.719
Erinaceus europaeus	Insectivora	Not relevant	extant	0.771
Euroscaptor micrura	Insectivora	Not relevant	extant	0.0605
Feroculus feroculus	Insectivora	Not relevant	extant	0.036
Galemys pyrenaicus	Insectivora	Not relevant	extant	0.0602
Geogale aurita	Insectivora	Not relevant	extant	0.00685
Hemicentetes nigricepts	Insectivora	Not relevant	extant	0.113
Hemicentetes semispinosus	Insectivora	Not relevant	extant	0.1359
Hemiechinus aethiopicus	Insectivora	Not relevant	extant	0.188
Hemiechinus auritus	Insectivora	Not relevant	extant	0.342
Hemiechinus hypomelas	Insectivora	Not relevant	extant	0.213
Hemiechinus micropus	Insectivora	Not relevant	extant	0.171
Hylomys suillus	Insectivora	Not relevant	extant	0.064
Limnogale mergulus	Insectivora	Not relevant	extant	0.0786
Megasorex gigas	Insectivora	Not relevant	extant	0.02
Microgale brevicaudata	Insectivora	Not relevant	extant	0.0113
Microgale cowani	Insectivora	Not relevant	extant	0.0138
Microgale dobsoni	Insectivora	Not relevant	extant	0.036
Microgale drouhardi	Insectivora	Not relevant	extant	0.0105
Microgale dryas	Insectivora	Not relevant	extant	0.04
Microgale fotsifotsy	Insectivora	Not relevant	extant	0.0077
Microgale gracilis	Insectivora	Not relevant	extant	0.0233
Microgale gymnorhyncha	Insectivora	Not relevant	extant	0.0182
Microgale longicaudata	Insectivora	Not relevant	extant	0.0073
Microgale longirostris	Insectivora	Not relevant	extant	0.025
Microgale monticola	Insectivora	Not relevant	extant	0.0139
Microgale parvula	Insectivora	Not relevant	extant	0.0034
Microgale principula	Insectivora	Not relevant	extant	0.0102
Microgale pusilla	Insectivora	Not relevant	extant	0.0034
Microgale soricoides	Insectivora	Not relevant	extant	0.0187
Microgale taiva	Insectivora	Not relevant	extant	0.0124
Microgale talazaci	Insectivora	Not relevant	extant	0.0425
Microgale thomasi	Insectivora	Not relevant	extant	0.0229
Micropotamogale lamottei	Insectivora	Not relevant	extant	0.0696
Micropotamogale ruwenzorii	Insectivora	Not relevant	extant	0.0985
Myosorex cafer	Insectivora	Not relevant	extant	0.0123
Myosorex geata	Insectivora	Not relevant	extant	0.0094
Myosorex varius	Insectivora	Not relevant	extant	0.0114
Nectogale elegans	Insectivora	Not relevant	extant	0.0325
Neomys anomalus	Insectivora	Not relevant	extant	0.016
Neomys fodiens	Insectivora	Not relevant	extant	0.0143
Neurotrichus gibbsii	Insectivora	Not relevant	extant	0.0089
Notiosorex crawfordi	Insectivora	Not relevant	extant	0.0044
Oryzorictes hova	Insectivora	Not relevant	extant	0.0365
Oryzorictes talpoides	Insectivora	Not relevant	extant	0.035
Oryzorictes tetradactylus	Insectivora	Not relevant	extant	0.036
Paracrocidura schoutedeni	Insectivora	Not relevant	extant	0.015
Parascalops breweri	Insectivora	Not relevant	extant	0.051
Potamogale velox	Insectivora	Not relevant	extant	0.66
Ruwenzorisorex suncoides	Insectivora	Not relevant	extant	0.0182
Scalopus aquaticus	Insectivora	Not relevant	extant	0.0913
Scapanus latimanus	Insectivora	Not relevant	extant	0.055
Scapanus orarius	Insectivora	Not relevant	extant	0.0612
Scapanus townsendii	Insectivora	Not relevant	extant	0.1417
Scutisorex somereni	Insectivora	Not relevant	extant	0.0915
Setifer setosus	Insectivora	Not relevant	extant	0.2534
Solenodon cubanus	Insectivora	Not relevant	extant	0.65
Solenodon paradoxus	Insectivora	Not relevant	extant	0.9
Sorex alaskanus	Insectivora	Not relevant	extant	0.014
Sorex alpinus	Insectivora	Not relevant	extant	0.0078
Sorex araneus	Insectivora	Not relevant	extant	0.01
Sorex arcticus	Insectivora	Not relevant	extant	0.0082
Sorex arizonae	Insectivora	Not relevant	extant	0.0024
Sorex bairdii	Insectivora	Not relevant	extant	0.0083
Sorex bendirii	Insectivora	Not relevant	extant	0.0161
Sorex caecutiens	Insectivora	Not relevant	extant	0.0054
Sorex cinereus	Insectivora	Not relevant	extant	0.0047
Sorex coronatus	Insectivora	Not relevant	extant	0.0096
Sorex dispar	Insectivora	Not relevant	extant	0.005
Sorex emarginatus	Insectivora	Not relevant	extant	0.007
Sorex fumeus	Insectivora	Not relevant	extant	0.0077
Sorex gaspensis	Insectivora	Not relevant	extant	0.0029
Sorex granarius	Insectivora	Not relevant	extant	0.0063
Sorex hoyi	Insectivora	Not relevant	extant	0.0026
Sorex isodon	Insectivora	Not relevant	extant	0.0105
Sorex longirostris	Insectivora	Not relevant	extant	0.0036
Sorex lyelli	Insectivora	Not relevant	extant	0.005
Sorex macrodon	Insectivora	Not relevant	extant	0.007
Sorex merriami	Insectivora	Not relevant	extant	0.0059
Sorex milleri	Insectivora	Not relevant	extant	0.007
Sorex minutissimus	Insectivora	Not relevant	extant	0.00255
Sorex minutus	Insectivora	Not relevant	extant	0.0045
Sorex monticolus	Insectivora	Not relevant	extant	0.0053
Sorex nanus	Insectivora	Not relevant	extant	0.0024
Sorex oreopolus	Insectivora	Not relevant	extant	0.007
Sorex ornatus	Insectivora	Not relevant	extant	0.005
Sorex pacificus	Insectivora	Not relevant	extant	0.0067
Sorex palustris	Insectivora	Not relevant	extant	0.0134
Sorex preblei	Insectivora	Not relevant	extant	0.0031
Sorex samniticus	Insectivora	Not relevant	extant	0.0083
Sorex saussurei	Insectivora	Not relevant	extant	0.0046
Sorex sclateri	Insectivora	Not relevant	extant	0.007
Sorex sonomae	Insectivora	Not relevant	extant	0.0083
Sorex stizodon	Insectivora	Not relevant	extant	0.007
Sorex tenellus	Insectivora	Not relevant	extant	0.0037
Sorex trowbridgii	Insectivora	Not relevant	extant	0.0038
Sorex vagrans	Insectivora	Not relevant	extant	0.0044
Sorex ventralis	Insectivora	Not relevant	extant	0.007
Sorex veraepacis	Insectivora	Not relevant	extant	0.0075
Soriculus nigrescens	Insectivora	Not relevant	extant	0.014
Soriculus salenskii	Insectivora	Not relevant	extant	0.0055
Suncus etruscus	Insectivora	Not relevant	extant	0.0021
Suncus infinitesimus	Insectivora	Not relevant	extant	0.0044
Suncus lixus	Insectivora	Not relevant	extant	0.008
Suncus madagascariensis	Insectivora	Not relevant	extant	0.0035
Suncus malayanus	Insectivora	Not relevant	extant	0.005
Suncus murinus	Insectivora	Not relevant	extant	0.06042
Suncus remyi	Insectivora	Not relevant	extant	0.004
Suncus varilla	Insectivora	Not relevant	extant	0.005
Surdisorex norae	Insectivora	Not relevant	extant	0.009
Surdisorex polulus	Insectivora	Not relevant	extant	0.009
Sylvisorex lunaris	Insectivora	Not relevant	extant	0.0185
Sylvisorex megalura	Insectivora	Not relevant	extant	0.0053
Sylvisorex vulcanorum	Insectivora	Not relevant	extant	0.0035
Talpa caeca	Insectivora	Not relevant	extant	0.0925
Talpa europaea	Insectivora	Not relevant	extant	0.077
Talpa romana	Insectivora	Not relevant	extant	0.0925
Tenrec ecaudatus	Insectivora	Not relevant	extant	0.684
Uropsilus soricipes	Insectivora	Not relevant	extant	0.016
Urotrichus talpoides	Insectivora	Not relevant	extant	0.045
Brachylagus idahoensis	Lagomorpha	Not relevant	extant	0.4213
Bunolagus monticularis	Lagomorpha	Not relevant	extant	1.75
Caprolagus hispidus	Lagomorpha	Not relevant	extant	2.497
Lepus alleni	Lagomorpha	Not relevant	extant	3.685
Lepus americanus	Lagomorpha	Not relevant	extant	1.71
Lepus arcticus	Lagomorpha	Not relevant	extant	4.405
Lepus californicus	Lagomorpha	Not relevant	extant	2.4225
Lepus callotis	Lagomorpha	Not relevant	extant	2.5
Lepus capensis	Lagomorpha	Not relevant	extant	3.425
Lepus europaeus	Lagomorpha	Not relevant	extant	3.74
Lepus flavigularis	Lagomorpha	Not relevant	extant	3
Lepus nigricollis	Lagomorpha	Not relevant	extant	2.2985
Lepus othus	Lagomorpha	Not relevant	extant	4.806
Lepus saxatilis	Lagomorpha	Not relevant	extant	2.225
Lepus starcki	Lagomorpha	Not relevant	extant	2.75
Lepus timidus	Lagomorpha	Not relevant	extant	3.048
Lepus tolai	Lagomorpha	Not relevant	extant	1.589
Lepus townsendii	Lagomorpha	Not relevant	extant	1.555
Lepus victoriae	Lagomorpha	Not relevant	extant	1.75
Ochotona alpina	Lagomorpha	Not relevant	extant	0.15
Ochotona collaris	Lagomorpha	Not relevant	extant	0.129
Ochotona macrotis	Lagomorpha	Not relevant	extant	0.26
Ochotona princeps	Lagomorpha	Not relevant	extant	0.1576
Ochotona pusilla	Lagomorpha	Not relevant	extant	0.1425
Ochotona roylei	Lagomorpha	Not relevant	extant	0.26
Ochotona rufescens	Lagomorpha	Not relevant	extant	0.25
Oryctolagus cuniculus	Lagomorpha	Not relevant	extant	1.82667
Poelagus marjorita	Lagomorpha	Not relevant	extant	2.5
Pronolagus crassicaudatus	Lagomorpha	Not relevant	extant	2.23
Pronolagus randensis	Lagomorpha	Not relevant	extant	2.335
Pronolagus rupestris	Lagomorpha	Not relevant	extant	2.25
Romerolagus diazi	Lagomorpha	Not relevant	extant	0.4767
Sylvilagus aquaticus	Lagomorpha	Not relevant	extant	2.1358
Sylvilagus audubonii	Lagomorpha	Not relevant	extant	0.8896
Sylvilagus bachmani	Lagomorpha	Not relevant	extant	0.6433
Sylvilagus brasiliensis	Lagomorpha	Not relevant	extant	0.95
Sylvilagus cunicularius	Lagomorpha	Not relevant	extant	3
Sylvilagus floridanus	Lagomorpha	Not relevant	extant	1.1728
Sylvilagus graysoni	Lagomorpha	Not relevant	extant	0.964
Sylvilagus insonus	Lagomorpha	Not relevant	extant	3
Sylvilagus nuttallii	Lagomorpha	Not relevant	extant	0.7551
Sylvilagus palustris	Lagomorpha	Not relevant	extant	1.5
Sylvilagus transitionalis	Lagomorpha	Not relevant	extant	0.6567
Elephantulus brachyrhynchus	Macroscelidea	Not relevant	extant	0.0475
Elephantulus edwardii	Macroscelidea	Not relevant	extant	0.048
Elephantulus fuscipes	Macroscelidea	Not relevant	extant	0.057
Elephantulus intufi	Macroscelidea	Not relevant	extant	0.0495
Elephantulus myurus	Macroscelidea	Not relevant	extant	0.0524
Elephantulus revoili	Macroscelidea	Not relevant	extant	0.0325
Elephantulus rozeti	Macroscelidea	Not relevant	extant	0.048
Elephantulus rufescens	Macroscelidea	Not relevant	extant	0.0375
Elephantulus rupestris	Macroscelidea	Not relevant	extant	0.0664
Macroscelides proboscideus	Macroscelidea	Not relevant	extant	0.0382
Petrodromus tetradactylus	Macroscelidea	Not relevant	extant	0.1875
Rhynchocyon chrysopygus	Macroscelidea	Not relevant	extant	0.54
Rhynchocyon cirnei	Macroscelidea	Not relevant	extant	0.49
Rhynchocyon petersi	Macroscelidea	Not relevant	extant	0.424
Dromiciops gliroides	Microbiotheria	Not relevant	extant	0.0223
Notoryctes typhlops	Notoryctemorphia	Not relevant	extant	0.055
Caenolestes caniventer	Paucituberculata	Not relevant	extant	0.04
Caenolestes convelatus	Paucituberculata	Not relevant	extant	0.04
Caenolestes fuliginosus	Paucituberculata	Not relevant	extant	0.0278
Lestoros inca	Paucituberculata	Not relevant	extant	0.0211
Rhyncholestes raphanurus	Paucituberculata	Not relevant	extant	0.021
Chaeropus ecaudatus	Peramelemorphia	Not relevant	extant	0.2
Echymipera clara	Peramelemorphia	Not relevant	extant	1.2365
Echymipera davidi	Peramelemorphia	Not relevant	extant	0.95
Echymipera echinista	Peramelemorphia	Not relevant	extant	1
Echymipera kalubu	Peramelemorphia	Not relevant	extant	0.782167
Echymipera rufescens	Peramelemorphia	Not relevant	extant	1.1
Isoodon auratus	Peramelemorphia	Not relevant	extant	0.425
Isoodon macrourus	Peramelemorphia	Not relevant	extant	1.6
Isoodon obesulus	Peramelemorphia	Not relevant	extant	0.775
Macrotis lagotis	Peramelemorphia	Not relevant	extant	1.35
Macrotis leucura	Peramelemorphia	Not relevant	extant	0.354
Microperoryctes longicauda	Peramelemorphia	Not relevant	extant	0.538
Microperoryctes papuensis	Peramelemorphia	Not relevant	extant	0.158
Perameles bougainville	Peramelemorphia	Not relevant	extant	0.226
Perameles eremiana	Peramelemorphia	Not relevant	extant	0.5
Perameles gunnii	Peramelemorphia	Not relevant	extant	0.87
Perameles nasuta	Peramelemorphia	Not relevant	extant	0.975
Peroryctes broadbenti	Peramelemorphia	Not relevant	extant	4.8
Peroryctes raffrayana	Peramelemorphia	Not relevant	extant	0.8385
Ceratotherium simum	Perissodactyla	Herbivore	extant	2949.99
Dicerorhinus sumatrensis	Perissodactyla	Herbivore	extant	1266.67
Diceros bicornis	Perissodactyla	Herbivore	extant	1180.51
Equus asinus	Perissodactyla	Herbivore	extant	244.999
Equus burchellii	Perissodactyla	Herbivore	extant	276
Equus caballus	Perissodactyla	Herbivore	extant	250
Equus grevyi	Perissodactyla	Herbivore	extant	408
Equus hemionus	Perissodactyla	Herbivore	extant	240
Equus kiang	Perissodactyla	Herbivore	extant	275
Equus quagga	Perissodactyla	Herbivore	extant	400
Equus zebra	Perissodactyla	Herbivore	extant	286.999
Rhinoceros sondaicus	Perissodactyla	Herbivore	extant	1750
Rhinoceros unicornis	Perissodactyla	Herbivore	extant	1602.33
Tapirus bairdii	Perissodactyla	Herbivore	extant	299.999
Tapirus indicus	Perissodactyla	Herbivore	extant	296.25
Tapirus pinchaque	Perissodactyla	Herbivore	extant	148.95
Tapirus terrestris	Perissodactyla	Herbivore	extant	207.501
Manis crassicaudata	Pholidota	Not relevant	extant	8.45735
Manis gigantea	Pholidota	Not relevant	extant	32.9997
Manis javanica	Pholidota	Not relevant	extant	5.15
Manis pentadactyla	Pholidota	Not relevant	extant	4.675
Manis temminckii	Pholidota	Not relevant	extant	7.1799
Manis tetradactyla	Pholidota	Not relevant	extant	2.75
Manis tricuspis	Pholidota	Not relevant	extant	2.1
Allenopithecus nigroviridis	Primates	Not relevant	extant	4.75
Allocebus trichotis	Primates	Not relevant	extant	0.0775
Alouatta belzebul	Primates	Not relevant	extant	6.4
Alouatta caraya	Primates	Not relevant	extant	5.8625
Alouatta fusca	Primates	Not relevant	extant	8
Alouatta palliata	Primates	Not relevant	extant	7.2749
Alouatta pigra	Primates	Not relevant	extant	7
Alouatta sara	Primates	Not relevant	extant	6.611
Alouatta seniculus	Primates	Not relevant	extant	6.1455
Aotus azarai	Primates	Not relevant	extant	0.9629
Aotus brumbacki	Primates	Not relevant	extant	0.8
Aotus hershkovitzi	Primates	Not relevant	extant	0.8
Aotus infulatus	Primates	Not relevant	extant	0.8
Aotus lemurinus	Primates	Not relevant	extant	0.873
Aotus miconax	Primates	Not relevant	extant	0.8
Aotus nancymaae	Primates	Not relevant	extant	0.788
Aotus nigriceps	Primates	Not relevant	extant	1.06
Aotus trivirgatus	Primates	Not relevant	extant	0.9
Aotus vociferans	Primates	Not relevant	extant	0.873
Archaeolemur edwardsi	Primates	Not relevant	extant	20
Archaeolemur majori	Primates	Not relevant	extant	20
Arctocebus aureus	Primates	Not relevant	extant	0.235
Arctocebus calabarensis	Primates	Not relevant	extant	0.21
Ateles belzebuth	Primates	Not relevant	extant	5
Ateles chamek	Primates	Not relevant	extant	6
Ateles fusciceps	Primates	Not relevant	extant	9.1
Ateles geoffroyi	Primates	Not relevant	extant	5.2849
Ateles marginatus	Primates	Not relevant	extant	6
Ateles paniscus	Primates	Not relevant	extant	7.9001
Avahi laniger	Primates	Not relevant	extant	0.9
Avahi occidentalis	Primates	Not relevant	extant	0.8
Brachyteles arachnoides	Primates	Not relevant	extant	13.4999
Cacajao calvus	Primates	Not relevant	extant	5.796
Cacajao melanocephalus	Primates	Not relevant	extant	3.8
Callicebus brunneus	Primates	Not relevant	extant	0.9924
Callicebus caligatus	Primates	Not relevant	extant	0.9924
Callicebus cinerascens	Primates	Not relevant	extant	0.9924
Callicebus cupreus	Primates	Not relevant	extant	0.915
Callicebus donacophilus	Primates	Not relevant	extant	0.795
Callicebus dubius	Primates	Not relevant	extant	0.9924
Callicebus hoffmannsi	Primates	Not relevant	extant	0.9924
Callicebus modestus	Primates	Not relevant	extant	0.9924
Callicebus moloch	Primates	Not relevant	extant	0.8547
Callicebus oenanthe	Primates	Not relevant	extant	0.9924
Callicebus olallae	Primates	Not relevant	extant	0.9924
Callicebus personatus	Primates	Not relevant	extant	1.35
Callicebus torquatus	Primates	Not relevant	extant	1.05
Callimico goeldii	Primates	Not relevant	extant	0.48
Callithrix argentata	Primates	Not relevant	extant	0.44
Callithrix aurita	Primates	Not relevant	extant	0.342
Callithrix flaviceps	Primates	Not relevant	extant	0.342
Callithrix geoffroyi	Primates	Not relevant	extant	0.342
Callithrix humeralifer	Primates	Not relevant	extant	0.35
Callithrix jacchus	Primates	Not relevant	extant	0.292
Callithrix kuhlii	Primates	Not relevant	extant	0.342
Callithrix penicillata	Primates	Not relevant	extant	0.342
Callithrix pygmaea	Primates	Not relevant	extant	0.125
Cebus albifrons	Primates	Not relevant	extant	2.629
Cebus apella	Primates	Not relevant	extant	2.5
Cebus capucinus	Primates	Not relevant	extant	2.7333
Cebus olivaceus	Primates	Not relevant	extant	2.6
Cercocebus agilis	Primates	Not relevant	extant	8
Cercocebus galeritus	Primates	Not relevant	extant	7.835
Cercocebus torquatus	Primates	Not relevant	extant	7.75
Cercopithecus ascanius	Primates	Not relevant	extant	3.55
Cercopithecus campbelli	Primates	Not relevant	extant	4.1
Cercopithecus cephus	Primates	Not relevant	extant	3.485
Cercopithecus diana	Primates	Not relevant	extant	4.175
Cercopithecus dryas	Primates	Not relevant	extant	3.075
Cercopithecus erythrogaster	Primates	Not relevant	extant	2.5
Cercopithecus erythrotis	Primates	Not relevant	extant	3.255
Cercopithecus hamlyni	Primates	Not relevant	extant	6.875
Cercopithecus lhoesti	Primates	Not relevant	extant	5.375
Cercopithecus mitis	Primates	Not relevant	extant	5
Cercopithecus mona	Primates	Not relevant	extant	4.625
Cercopithecus neglectus	Primates	Not relevant	extant	5.48
Cercopithecus nictitans	Primates	Not relevant	extant	5.41
Cercopithecus petaurista	Primates	Not relevant	extant	2.775
Cercopithecus pogonias	Primates	Not relevant	extant	3.765
Cercopithecus preussi	Primates	Not relevant	extant	5.25
Cercopithecus sclateri	Primates	Not relevant	extant	3.375
Cercopithecus solatus	Primates	Not relevant	extant	6.5
Cercopithecus wolfi	Primates	Not relevant	extant	4
Cheirogaleus major	Primates	Not relevant	extant	0.45
Cheirogaleus medius	Primates	Not relevant	extant	0.181
Chiropotes albinasus	Primates	Not relevant	extant	2.9
Chiropotes satanas	Primates	Not relevant	extant	3
Chlorocebus aethiops	Primates	Not relevant	extant	4.155
Colobus angolensis	Primates	Not relevant	extant	9.85
Colobus guereza	Primates	Not relevant	extant	10.2
Colobus polykomos	Primates	Not relevant	extant	9.8349
Colobus satanas	Primates	Not relevant	extant	4.32
Daubentonia madagascariensis	Primates	Not relevant	extant	2.5
Erythrocebus patas	Primates	Not relevant	extant	7.2699
Eulemur coronatus	Primates	Not relevant	extant	1.65
Eulemur fulvus	Primates	Not relevant	extant	3.15
Eulemur macaco	Primates	Not relevant	extant	2.04
Eulemur mongoz	Primates	Not relevant	extant	1.6
Eulemur rubriventer	Primates	Not relevant	extant	1.4
Euoticus elegantulus	Primates	Not relevant	extant	0.3
Euoticus pallidus	Primates	Not relevant	extant	0.23
Galago alleni	Primates	Not relevant	extant	0.26
Galago gallarum	Primates	Not relevant	extant	0.25
Galago matschiei	Primates	Not relevant	extant	0.21
Galago moholi	Primates	Not relevant	extant	0.16
Galago senegalensis	Primates	Not relevant	extant	0.153
Galagoides demidoff	Primates	Not relevant	extant	0.061
Galagoides zanzibaricus	Primates	Not relevant	extant	0.1005
Gorilla gorilla	Primates	Not relevant	extant	124.251
Hapalemur aureus	Primates	Not relevant	extant	1.575
Hapalemur griseus	Primates	Not relevant	extant	1.4
Hapalemur simus	Primates	Not relevant	extant	2.35
Hylobates agilis	Primates	Not relevant	extant	5.65
Hylobates concolor	Primates	Not relevant	extant	6.02817
Hylobates hoolock	Primates	Not relevant	extant	6.7
Hylobates klossii	Primates	Not relevant	extant	5.8
Hylobates lar	Primates	Not relevant	extant	4.892
Hylobates leucogenys	Primates	Not relevant	extant	7.32
Hylobates moloch	Primates	Not relevant	extant	6.5
Hylobates muelleri	Primates	Not relevant	extant	6
Hylobates pileatus	Primates	Not relevant	extant	5.44
Hylobates syndactylus	Primates	Not relevant	extant	10
Indri indri	Primates	Not relevant	extant	8
Lagothrix flavicauda	Primates	Not relevant	extant	6.8
Lagothrix lagotricha	Primates	Not relevant	extant	6.3
Lemur catta	Primates	Not relevant	extant	2.9
Leontopithecus caissara	Primates	Not relevant	extant	0.572
Leontopithecus chrysomela	Primates	Not relevant	extant	0.7
Leontopithecus chrysopygus	Primates	Not relevant	extant	0.7
Leontopithecus rosalia	Primates	Not relevant	extant	0.5355
Lepilemur dorsalis	Primates	Not relevant	extant	0.5
Lepilemur edwardsi	Primates	Not relevant	extant	0.7
Lepilemur leucopus	Primates	Not relevant	extant	0.65
Lepilemur microdon	Primates	Not relevant	extant	0.9
Lepilemur mustelinus	Primates	Not relevant	extant	0.773
Lepilemur ruficaudatus	Primates	Not relevant	extant	0.7
Lepilemur septentrionalis	Primates	Not relevant	extant	0.75
Lophocebus albigena	Primates	Not relevant	extant	7.6901
Loris tardigradus	Primates	Not relevant	extant	0.22765
Macaca arctoides	Primates	Not relevant	extant	5
Macaca assamensis	Primates	Not relevant	extant	12
Macaca cyclopis	Primates	Not relevant	extant	6
Macaca fascicularis	Primates	Not relevant	extant	3.9915
Macaca fuscata	Primates	Not relevant	extant	10.4
Macaca maura	Primates	Not relevant	extant	7.3
Macaca mulatta	Primates	Not relevant	extant	3.713
Macaca nemestrina	Primates	Not relevant	extant	6.2965
Macaca nigra	Primates	Not relevant	extant	6.4
Macaca ochreata	Primates	Not relevant	extant	2.6
Macaca radiata	Primates	Not relevant	extant	3.69
Macaca silenus	Primates	Not relevant	extant	4.75
Macaca sinica	Primates	Not relevant	extant	3.59
Macaca sylvanus	Primates	Not relevant	extant	7
Macaca thibetana	Primates	Not relevant	extant	12
Macaca tonkeana	Primates	Not relevant	extant	9
Mandrillus leucophaeus	Primates	Not relevant	extant	15
Mandrillus sphinx	Primates	Not relevant	extant	18.2499
Megaladapis edwardsi	Primates	Not relevant	extant	75
Megaladapis grandidieri	Primates	Not relevant	extant	52.5
Megaladapis madagascariensis	Primates	Not relevant	extant	52.5
Microcebus coquereli	Primates	Not relevant	extant	0.308
Microcebus murinus	Primates	Not relevant	extant	0.069
Microcebus myoxinus	Primates	Not relevant	extant	0.03
Microcebus ravelobensis	Primates	Not relevant	extant	0.055
Microcebus rufus	Primates	Not relevant	extant	0.0425
Miopithecus talapoin	Primates	Not relevant	extant	1.25
Mirza coquereli	Primates	Not relevant	extant	0.308
Nasalis concolor	Primates	Not relevant	extant	7.1
Nasalis larvatus	Primates	Not relevant	extant	9
Nycticebus coucang	Primates	Not relevant	extant	0.8035
Nycticebus pygmaeus	Primates	Not relevant	extant	0.9
Otolemur crassicaudatus	Primates	Not relevant	extant	1.5
Otolemur garnettii	Primates	Not relevant	extant	0.76
Pachylemur isignis	Primates	Not relevant	extant	9
Pachylemur jullyi	Primates	Not relevant	extant	9
Pan paniscus	Primates	Not relevant	extant	34.0001
Pan troglodytes	Primates	Not relevant	extant	44.9997
Papio hamadryas	Primates	Not relevant	extant	21.2501
Perodicticus potto	Primates	Not relevant	extant	1.1
Phaner furcifer	Primates	Not relevant	extant	0.4
Pithecia aequatorialis	Primates	Not relevant	extant	2.25
Pithecia albicans	Primates	Not relevant	extant	2.8
Pithecia irrorata	Primates	Not relevant	extant	2.241
Pithecia monachus	Primates	Not relevant	extant	1.5375
Pithecia pithecia	Primates	Not relevant	extant	1.3755
Pongo pygmaeus	Primates	Not relevant	extant	37
Presbytis comata	Primates	Not relevant	extant	6.25
Presbytis femoralis	Primates	Not relevant	extant	7
Presbytis frontata	Primates	Not relevant	extant	6.05
Presbytis hosei	Primates	Not relevant	extant	6.5
Presbytis melalophos	Primates	Not relevant	extant	6.3
Presbytis potenziani	Primates	Not relevant	extant	6.45
Presbytis rubicunda	Primates	Not relevant	extant	6.3
Presbytis thomasi	Primates	Not relevant	extant	6.69
Procolobus badius	Primates	Not relevant	extant	8.9999
Procolobus pennantii	Primates	Not relevant	extant	10.896
Procolobus preussi	Primates	Not relevant	extant	9.75
Procolobus rufomitratus	Primates	Not relevant	extant	8
Procolobus verus	Primates	Not relevant	extant	4
Propithecus diadema	Primates	Not relevant	extant	7.5
Propithecus tattersalli	Primates	Not relevant	extant	3.5
Propithecus verreauxi	Primates	Not relevant	extant	3.48
Pygathrix avunculus	Primates	Not relevant	extant	8.25
Pygathrix bieti	Primates	Not relevant	extant	9.96
Pygathrix nemaeus	Primates	Not relevant	extant	8.31
Pygathrix roxellana	Primates	Not relevant	extant	14
Saguinus bicolor	Primates	Not relevant	extant	0.465
Saguinus fuscicollis	Primates	Not relevant	extant	0.387
Saguinus geoffroyi	Primates	Not relevant	extant	0.4865
Saguinus imperator	Primates	Not relevant	extant	0.4
Saguinus inustus	Primates	Not relevant	extant	0.4105
Saguinus labiatus	Primates	Not relevant	extant	0.575
Saguinus leucopus	Primates	Not relevant	extant	0.44
Saguinus midas	Primates	Not relevant	extant	0.54
Saguinus mystax	Primates	Not relevant	extant	0.618
Saguinus nigricollis	Primates	Not relevant	extant	0.462
Saguinus oedipus	Primates	Not relevant	extant	0.43
Saguinus tripartitus	Primates	Not relevant	extant	0.3935
Saimiri boliviensis	Primates	Not relevant	extant	0.615
Saimiri oerstedii	Primates	Not relevant	extant	0.2785
Saimiri sciureus	Primates	Not relevant	extant	0.7432
Saimiri ustus	Primates	Not relevant	extant	1
Saimiri vanzolinii	Primates	Not relevant	extant	0.7696
Semnopithecus entellus	Primates	Not relevant	extant	11.5298
Tarsius bancanus	Primates	Not relevant	extant	0.09425
Tarsius dianae	Primates	Not relevant	extant	0.107
Tarsius spectrum	Primates	Not relevant	extant	0.2
Tarsius syrichta	Primates	Not relevant	extant	0.104
Theropithecus gelada	Primates	Not relevant	extant	17.0498
Trachypithecus cristatus	Primates	Not relevant	extant	8.35
Trachypithecus francoisi	Primates	Not relevant	extant	7.325
Trachypithecus geei	Primates	Not relevant	extant	8.35
Trachypithecus johnii	Primates	Not relevant	extant	11.921
Trachypithecus obscurus	Primates	Not relevant	extant	6.42
Trachypithecus phayrei	Primates	Not relevant	extant	8.4
Trachypithecus pileatus	Primates	Not relevant	extant	11.45
Trachypithecus vetulus	Primates	Not relevant	extant	8.83
Varecia variegata	Primates	Not relevant	extant	3.85
Elephas maximus	Proboscidea	Herbivore	extant	2915.04
Loxodonta africana	Proboscidea	Herbivore	extant	3940.03
Abrawayaomys ruschii	Rodentia	Not relevant	extant	0.063
Abrocoma bennetti	Rodentia	Not relevant	extant	0.2505
Abrocoma boliviensis	Rodentia	Not relevant	extant	0.158
Abrocoma cinerea	Rodentia	Not relevant	extant	0.25
Acomys cahirinus	Rodentia	Not relevant	extant	0.0525
Acomys kempi	Rodentia	Not relevant	extant	0.022
Acomys louisae	Rodentia	Not relevant	extant	0.0202
Acomys minous	Rodentia	Not relevant	extant	0.0625
Acomys percivali	Rodentia	Not relevant	extant	0.022
Acomys russatus	Rodentia	Not relevant	extant	0.0497
Acomys spinosissimus	Rodentia	Not relevant	extant	0.0265
Acomys subspinosus	Rodentia	Not relevant	extant	0.021
Acomys wilsoni	Rodentia	Not relevant	extant	0.0185
Aconaemys fuscus	Rodentia	Not relevant	extant	0.1335
Aconaemys sagei	Rodentia	Not relevant	extant	0.0965
Aepeomys fuscatus	Rodentia	Not relevant	extant	0.0495
Aepeomys lugens	Rodentia	Not relevant	extant	0.037
Aeromys tephromelas	Rodentia	Not relevant	extant	1.075
Aeromys thomasi	Rodentia	Not relevant	extant	1.435
Aethomys chrysophilus	Rodentia	Not relevant	extant	0.0724
Aethomys granti	Rodentia	Not relevant	extant	0.04
Aethomys hindei	Rodentia	Not relevant	extant	0.1
Aethomys kaiseri	Rodentia	Not relevant	extant	0.09
Aethomys namaquensis	Rodentia	Not relevant	extant	0.0488
Agouti paca	Rodentia	Not relevant	extant	8
Agouti taczanowskii	Rodentia	Not relevant	extant	8.9999
Akodon aerosus	Rodentia	Not relevant	extant	0.06
Akodon affinis	Rodentia	Not relevant	extant	0.0249
Akodon albiventer	Rodentia	Not relevant	extant	0.0218
Akodon azarae	Rodentia	Not relevant	extant	0.025
Akodon bogotensis	Rodentia	Not relevant	extant	0.013
Akodon boliviensis	Rodentia	Not relevant	extant	0.0275
Akodon budini	Rodentia	Not relevant	extant	0.0269
Akodon cursor	Rodentia	Not relevant	extant	0.0399
Akodon dayi	Rodentia	Not relevant	extant	0.0325
Akodon dolores	Rodentia	Not relevant	extant	0.0505
Akodon fumeus	Rodentia	Not relevant	extant	0.0227
Akodon illuteus	Rodentia	Not relevant	extant	0.0478
Akodon iniscatus	Rodentia	Not relevant	extant	0.0287
Akodon juninensis	Rodentia	Not relevant	extant	0.039
Akodon kempi	Rodentia	Not relevant	extant	0.0264
Akodon kofordi	Rodentia	Not relevant	extant	0.0295
Akodon lanosus	Rodentia	Not relevant	extant	0.0325
Akodon latebricola	Rodentia	Not relevant	extant	0.039
Akodon lindberghi	Rodentia	Not relevant	extant	0.0264
Akodon longipilis	Rodentia	Not relevant	extant	0.0376
Akodon mansoensis	Rodentia	Not relevant	extant	0.039
Akodon mimus	Rodentia	Not relevant	extant	0.024
Akodon molinae	Rodentia	Not relevant	extant	0.033
Akodon mollis	Rodentia	Not relevant	extant	0.0304
Akodon neocenus	Rodentia	Not relevant	extant	0.0424
Akodon nigrita	Rodentia	Not relevant	extant	0.0199
Akodon olivaceus	Rodentia	Not relevant	extant	0.027
Akodon orophilus	Rodentia	Not relevant	extant	0.039
Akodon puer	Rodentia	Not relevant	extant	0.0207
Akodon sanborni	Rodentia	Not relevant	extant	0.0247
Akodon sanctipaulensis	Rodentia	Not relevant	extant	0.0271
Akodon serrensis	Rodentia	Not relevant	extant	0.0283
Akodon siberiae	Rodentia	Not relevant	extant	0.0346
Akodon simulator	Rodentia	Not relevant	extant	0.0425
Akodon spegazzinii	Rodentia	Not relevant	extant	0.0286
Akodon subfuscus	Rodentia	Not relevant	extant	0.0304
Akodon surdus	Rodentia	Not relevant	extant	0.039
Akodon sylvanus	Rodentia	Not relevant	extant	0.039
Akodon toba	Rodentia	Not relevant	extant	0.0512
Akodon torques	Rodentia	Not relevant	extant	0.039
Akodon urichi	Rodentia	Not relevant	extant	0.034
Akodon varius	Rodentia	Not relevant	extant	0.04
Akodon xanthorhinus	Rodentia	Not relevant	extant	0.0213
Allactaga elater	Rodentia	Not relevant	extant	0.059
Allactaga euphratica	Rodentia	Not relevant	extant	0.232
Allactaga tetradactyla	Rodentia	Not relevant	extant	0.052
Alticola argentatus	Rodentia	Not relevant	extant	0.0377
Alticola roylei	Rodentia	Not relevant	extant	0.037
Alticola stoliczkanus	Rodentia	Not relevant	extant	0.0303
Alticola strelzowi	Rodentia	Not relevant	extant	0.05
Ammodillus imbellis	Rodentia	Not relevant	extant	0.05
Ammospermophilus harrisii	Rodentia	Not relevant	extant	0.122
Ammospermophilus interpres	Rodentia	Not relevant	extant	0.1103
Ammospermophilus leucurus	Rodentia	Not relevant	extant	0.1037
[truncated: 1,503 more rows]

## Sheet: ModernBirds
Data source: Dunning JB (2007) CRC handbook of avian body masses, second edition: CRC Press.; Dunning JB (2013) Updates to the second edition of the CRC handbook of avian body masses: https://ag.purdue.edu/fnr/Documents/BodyMassesBirds.pdf.
Species	Family	Body mass (kg)
Abeillia abeillei	Trochilidae	0.0027
Abroscopus schisticeps	Sylviidae	0.0047
Abroscopus superciliaris	Sylviidae	0.00665
Aburria aburri	Cracidae	1.4075
Acanthagenys rufogularis	Meliphagidae	0.0478
Acanthidops bairdii	Emberizidae	0.016
Acanthisitta chloris	Acanthisittidae	0.00695
Acanthiza apicalis	Acanthizidae	0.0075
Acanthiza chrysorrhoa chrysorrhoa	Acanthizidae	0.0092
Acanthiza chrysorrhoa leachi	Acanthizidae	0.0104
Acanthiza chrysorrhoa normantoni	Acanthizidae	0.0084
Acanthiza ewingii	Acanthizidae	0.0069
Acanthiza inornata	Acanthizidae	0.007
Acanthiza iredalei iredalei	Acanthizidae	0.0058
Acanthiza iredalei rosinae	Acanthizidae	0.0063
Acanthiza katherina	Acanthizidae	0.0072
Acanthiza lineata alberti	Acanthizidae	0.0067
Acanthiza lineata lineata	Acanthizidae	0.0072
Acanthiza murina	Acanthizidae	0.0084
Acanthiza nana modesta	Acanthizidae	0.0063
Acanthiza nana nana	Acanthizidae	0.0061
Acanthiza pusilla diemenensis	Acanthizidae	0.00815
Acanthiza pusilla pusilla	Acanthizidae	0.0068
Acanthiza reguloides	Acanthizidae	0.0077
Acanthiza robustirostris	Acanthizidae	0.0061
Acanthiza uropygialis	Acanthizidae	0.0064
Acanthorhynchus superciliosus	Meliphagidae	0.00975
Acanthorhynchus tenuirostris dubius	Meliphagidae	0.0098
Acanthorhynchus tenuirostris tenuirostris	Meliphagidae	0.0112
Acanthornis magnus	Acanthizidae	0.0102
Accipiter albogularis	Accipitridae	0.2365
Accipiter badius	Accipitridae	0.1325
Accipiter bicolor	Accipitridae	0.301
Accipiter brachyurus	Accipitridae	0.142
Accipiter brevipes	Accipitridae	0.1875
Accipiter castanilius	Accipitridae	0.15925
Accipiter chilensis	Accipitridae	0.368
Accipiter cirrocephalus	Accipitridae	0.172
Accipiter cooperii	Accipitridae	0.439
Accipiter erythrauchen	Accipitridae	0.156
Accipiter erythronemius	Accipitridae	0.125
Accipiter erythropus	Accipitridae	0.11535
Accipiter fasciatus didimus	Accipitridae	0.285
Accipiter fasciatus fasciatus	Accipitridae	0.4755
Accipiter francesii	Accipitridae	0.1385
Accipiter gentilis	Accipitridae	1.0245
Accipiter gentilis apache	Accipitridae	0.845
Accipiter gentilis schvedowi	Accipitridae	0.8355
Accipiter griseiceps	Accipitridae	0.2555
Accipiter gularis	Accipitridae	0.122
Accipiter gundlachi	Accipitridae	0.675
Accipiter haplochrous	Accipitridae	0.2045
Accipiter henstii	Accipitridae	1.05
Accipiter hiogaster dampieri	Accipitridae	0.2585
Accipiter hiogaster leucosomus	Accipitridae	0.343
Accipiter hiogaster pulchellus	Accipitridae	0.28
Accipiter imitator	Accipitridae	0.223
Accipiter luteoschistaceus	Accipitridae	0.214
Accipiter madagascariensis	Accipitridae	0.182
Accipiter melanochlamys	Accipitridae	0.235
Accipiter melanoleucus	Accipitridae	0.621
Accipiter meyerianus	Accipitridae	0.815
Accipiter minullus	Accipitridae	0.09
Accipiter nisus	Accipitridae	0.2375
Accipiter novaehollandiae	Accipitridae	0.37525
Accipiter ovampensis	Accipitridae	0.196
Accipiter poliocephalus	Accipitridae	0.2475
Accipiter rhodogaster	Accipitridae	0.1885
Accipiter rufitorques	Accipitridae	0.2355
Accipiter rufiventris	Accipitridae	0.173333
Accipiter soloensis	Accipitridae	0.1655
Accipiter striatus	Accipitridae	0.1385
Accipiter striatus venator	Accipitridae	0.13295
Accipiter superciliosus	Accipitridae	0.10395
Accipiter tachiro	Accipitridae	0.2895
Accipiter toussenelii	Accipitridae	0.235
Accipiter trinotatus	Accipitridae	0.146
Accipiter trivirgatus	Accipitridae	0.276
Accipiter ventralis	Accipitridae	0.233
Accipiter virgatus	Accipitridae	0.1215
Accipiter virgatus affinis	Accipitridae	0.112
Accipiter virgatus confusus	Accipitridae	0.11325
Accipiter virgatus quaggae	Accipitridae	0.0858
Aceros cassidix	Bucerotidae	2.36
Aceros comatus	Bucerotidae	1.47
Aceros corrugatus	Bucerotidae	1.59
Aceros everetti	Bucerotidae	0.9755
Aceros leucocephalus	Bucerotidae	1.086
Aceros narcondami	Bucerotidae	0.7
Aceros nipalensis	Bucerotidae	2.385
Aceros plicatus	Bucerotidae	1.7065
Aceros subruficollis	Bucerotidae	2.042
Aceros undulatus	Bucerotidae	2.2325
Aceros waldeni	Bucerotidae	0.947
Acridotheres cristatellus	Sturnidae	0.1165
Acridotheres fuscus	Sturnidae	0.0828
Acridotheres ginginianus	Sturnidae	0.072
Acridotheres grandis	Sturnidae	0.099
Acridotheres javanicus	Sturnidae	0.0935
Acridotheres tristis	Sturnidae	0.1166
Acritillas indica	Pycnonotidae	0.0306
Acrobatornis fonsecai	Furnariidae	0.0137
Acrocephalus aedon	Sylviidae	0.0224
Acrocephalus aequinoctialis	Sylviidae	0.025
Acrocephalus agricola	Sylviidae	0.0096
Acrocephalus arundinaceus	Sylviidae	0.0289
Acrocephalus atyphus	Sylviidae	0.0291
Acrocephalus australis	Sylviidae	0.0177
Acrocephalus baeticatus	Sylviidae	0.0102
Acrocephalus bistrigiceps	Sylviidae	0.00896667
Acrocephalus brevipennis	Sylviidae	0.016
Acrocephalus concinens	Sylviidae	0.0083
Acrocephalus dumetorum	Sylviidae	0.0142
Acrocephalus familiaris	Sylviidae	0.0183
Acrocephalus gracilirostris	Sylviidae	0.0149
Acrocephalus griseldis	Sylviidae	0.0167
Acrocephalus kerearako	Sylviidae	0.0225
Acrocephalus luscinia	Sylviidae	0.0308333
Acrocephalus melanopogon	Sylviidae	0.0109
Acrocephalus melanopogon melanopogon	Sylviidae	0.0114
Acrocephalus melanopogon mimicus	Sylviidae	0.0107
Acrocephalus newtoni	Sylviidae	0.017
Acrocephalus orientalis	Sylviidae	0.0245
Acrocephalus orinus	Sylviidae	0.01
Acrocephalus paludicola	Sylviidae	0.0121
Acrocephalus palustris	Sylviidae	0.0115
Acrocephalus rimitarae	Sylviidae	0.0265
Acrocephalus rodericanus	Sylviidae	0.0121
Acrocephalus rufescens	Sylviidae	0.02275
Acrocephalus schoenobaenus	Sylviidae	0.01185
Acrocephalus scirpaceus	Sylviidae	0.0123
Acrocephalus sechellensis	Sylviidae	0.0159
Acrocephalus sorghophilus	Sylviidae	0.0081
Acrocephalus stentoreus	Sylviidae	0.0242
Acrocephalus taiti	Sylviidae	0.0243
Acrocephalus tangorum	Sylviidae	0.0079
Acrocephalus vaughani	Sylviidae	0.0245
Acropternis orthonyx	Rhinocryptidae	0.09
Acryllium vulturinum	Numididae	1.33
Actenoides bougainvillei excelsus	Alcedinidae	0.188
Actenoides concretus	Alcedinidae	0.0735
Actenoides hombroni	Alcedinidae	0.117
Actenoides lindsayi	Alcedinidae	0.09335
Actenoides princeps	Alcedinidae	0.105
Actinodura egertoni	Timaliidae	0.036
Actinodura morrisoniana	Timaliidae	0.02805
Actinodura nipalensis	Timaliidae	0.044
Actinodura ramsayi	Timaliidae	0.0384
Actinodura waldeni	Timaliidae	0.0475
Actitis hypoleucos	Scolopacidae	0.0515
Actitis macularius	Scolopacidae	0.0404
Actophilornis africanus	Corvidae	0.199
Actophilornis albinucha	Corvidae	0.239
Adelomyia melanogenys	Trochilidae	0.00495
Aechmophorus clarkii clarkii	Podicipedidae	0.9675
Aechmophorus clarkii transitionalis	Podicipedidae	1.237
Aechmophorus occidentalis ephemeralis	Podicipedidae	0.9975
Aechmophorus occidentalis occidentalis	Podicipedidae	1.314
Aegithalos bonvaloti	Aegithalidae	0.008
Aegithalos caudatus	Aegithalidae	0.0086
Aegithalos concinnus	Aegithalidae	0.0061
Aegithalos fuliginosus	Aegithalidae	0.006
Aegithalos iouschistos	Aegithalidae	0.007
Aegithalos leucogenys	Aegithalidae	0.00675
Aegithalos niveogularis	Aegithalidae	0.0078
Aegithina nigrolutea	Aegithinidae	0.012
Aegithina tiphia	Aegithinidae	0.012
Aegithina viridissima	Aegithinidae	0.0134
Aegolius acadicus	Strigidae	0.1042
Aegolius funereus	Strigidae	0.137167
Aegolius harrisii	Strigidae	0.12
Aegolius ridgwayi	Strigidae	0.08
Aegotheles albertisi	Aegothelidae	0.0352
Aegotheles archboldi	Aegothelidae	0.0306
Aegotheles bennettii affinis	Aegothelidae	0.053625
Aegotheles crinifrons	Aegothelidae	0.136
Aegotheles cristatus cristatus	Aegothelidae	0.044
Aegotheles cristatus tasmanicus	Aegothelidae	0.0416
Aegotheles insignis	Aegothelidae	0.0785
Aegotheles tatei	Aegothelidae	0.052
Aegotheles wallacii	Aegothelidae	0.05075
Aegypius monachus	Accipitridae	9.625
Aenigmatolimnas marginalis	Rallidae	0.0512
Aepypodius arfakianus	Megapodiidae	1.464
Aerodramus bartschi	Apodidae	0.008
Aerodramus brevirostris	Apodidae	0.0126
Aerodramus elaphrus	Apodidae	0.0107
Aerodramus francicus	Apodidae	0.0089
Aerodramus fuciphagus	Apodidae	0.0107
Aerodramus germani	Apodidae	0.0135
Aerodramus hirundinaceus	Apodidae	0.0101
Aerodramus maximus	Apodidae	0.017
Aerodramus mearnsi	Apodidae	0.0113
Aerodramus palawanensis	Apodidae	0.0204
Aerodramus papuensis	Apodidae	0.0199
Aerodramus salangana	Apodidae	0.0113
Aerodramus sawtelli	Apodidae	0.0086
Aerodramus spodiopygius assimilis	Apodidae	0.0082
Aerodramus spodiopygius chillagoensis	Apodidae	0.0093
Aerodramus spodiopygius leucopygia	Apodidae	0.0068
Aerodramus spodiopygius spodiopygius	Apodidae	0.009
Aerodramus terraereginae	Apodidae	0.012
Aerodramus unicolor	Apodidae	0.011
Aerodramus vanikorensis yorki	Apodidae	0.0107
Aerodramus vulcanorum	Apodidae	0.0143
Aerodramus whiteheadi	Apodidae	0.014
Aeronautes andecolus andecolus	Apodidae	0.02
Aeronautes andecolus parvulus	Apodidae	0.0155
Aeronautes montivagus	Apodidae	0.02015
Aeronautes saxatalis	Apodidae	0.0321
Aethia cristatella	Alcidae	0.2595
Aethia psittacula	Alcidae	0.27
Aethia pusilla	Alcidae	0.084
Aethia pygmaea	Alcidae	0.112
Aethopyga bella	Nectariniidae	0.004125
Aethopyga boltoni malindangensis	Nectariniidae	0.00755
Aethopyga boltoni tibolii	Nectariniidae	0.0063
Aethopyga christinae	Nectariniidae	0.0056
Aethopyga flagrans	Nectariniidae	0.0067
Aethopyga gouldiae	Nectariniidae	0.006125
Aethopyga ignicauda	Nectariniidae	0.0082
Aethopyga linaraborae	Nectariniidae	0.0072
Aethopyga mystacalis	Nectariniidae	0.006
Aethopyga nipalensis	Nectariniidae	0.006325
Aethopyga primigenia	Nectariniidae	0.007
Aethopyga pulcherrima	Nectariniidae	0.0062
Aethopyga saturata	Nectariniidae	0.0053
Aethopyga shelleyi	Nectariniidae	0.004
Aethopyga siparaja	Nectariniidae	0.0067
Aethopyga temminckii	Nectariniidae	0.0055
Aethopyga vigorsii	Nectariniidae	0.0078
Afropavo congensis	Phasianidae	1.281
Agamia agami	Ardeidae	0.567
Agapornis canus	Psittacidae	0.03
Agapornis fisheri	Psittacidae	0.0483
Agapornis lilianae	Psittacidae	0.0373
Agapornis nigrigenis	Psittacidae	0.0414
Agapornis personatus	Psittacidae	0.0525
Agapornis pullarius	Psittacidae	0.0393
Agapornis roseicollis	Psittacidae	0.05425
Agapornis swindernianus	Psittacidae	0.04
Agapornis taranta	Psittacidae	0.0575
Agelaius assimilis	Icteridae	0.0481
Agelaius cyanopus	Icteridae	0.0376
Agelaius flavus	Icteridae	0.043
Agelaius humeralis	Icteridae	0.03635
Agelaius icterocephalus	Icteridae	0.031
Agelaius phoeniceus	Icteridae	0.0524
Agelaius ruficapillus	Icteridae	0.03675
Agelaius thilius	Icteridae	0.0317
Agelaius tricolor	Icteridae	0.0587
Agelaius xanthomus	Icteridae	0.0384
Agelaius xanthophthalmus	Icteridae	0.0451
Agelastes meleagrides	Numididae	0.815
Agelastes niger	Numididae	0.7
Aglaeactis castelnaudii	Trochilidae	0.0067
Aglaeactis cupripennis	Trochilidae	0.0076
Aglaeactis pamela	Trochilidae	0.0055
Aglaiocercus berlepschi	Trochilidae	0.005
Aglaiocercus coelestis	Trochilidae	0.00565
Aglaiocercus kingi	Trochilidae	0.00485
Agriornis lividus	Tyrannidae	0.09915
Agriornis microptera	Tyrannidae	0.0678
Agriornis montana	Tyrannidae	0.0633
Agriornis murina	Tyrannidae	0.0299
Agropsar sturninus	Sturnidae	0.0452
Agyrtria brevirostris	Trochilidae	0.0043
Agyrtria candida	Trochilidae	0.0038
Agyrtria cyanocephala	Trochilidae	0.0051
Agyrtria franciae	Trochilidae	0.005
Agyrtria leucogaster	Trochilidae	0.0047
Agyrtria versicolor	Trochilidae	0.0041
Agyrtria violiceps	Trochilidae	0.0051
Agyrtria viridifrons	Trochilidae	0.0063
Ailuroedus buccoides	Ptilonorhynchidae	0.1375
Ailuroedus crassirostris	Ptilonorhynchidae	0.2055
Ailuroedus melanotis	Ptilonorhynchidae	0.177
Aimophila aestivalis	Emberizidae	0.0196
Aimophila botterii	Emberizidae	0.0199
Aimophila carpalis	Emberizidae	0.0153
Aimophila cassinii	Emberizidae	0.0189
Aimophila humeralis	Emberizidae	0.0239
Aimophila mystacalis	Emberizidae	0.0222
Aimophila notosticta	Emberizidae	0.0271
Aimophila quinquestriata	Emberizidae	0.01955
Aimophila rufescens	Emberizidae	0.0343
Aimophila ruficauda	Emberizidae	0.0282
Aimophila ruficeps	Emberizidae	0.0187
Aimophila stolzmanni	Emberizidae	0.02565
Aimophila strigiceps	Emberizidae	0.0222
Aimophila sumichrasti	Emberizidae	0.02945
Aix galericulata	Anatidae	0.57
Aix sponsa	Anatidae	0.658
Alaemon alaudipes	Alaudidae	0.0414
Alario leucolaemus	Fringillidae	0.0122
Alauda arvensis	Alaudidae	0.037475
Alauda gulgula	Alaudidae	0.0263
Alauda razae	Alaudidae	0.02175
Alca torda	Alcidae	0.726
Alcedo argentata	Alcedinidae	0.0179
Alcedo atthis	Alcedinidae	0.0293
Alcedo atthis atthis	Alcedinidae	0.027
Alcedo atthis ispida	Alcedinidae	0.0358
Alcedo azurea	Alcedinidae	0.0349
Alcedo cristata	Alcedinidae	0.0157
Alcedo cyanopectus	Alcedinidae	0.0215
Alcedo euryzona	Alcedinidae	0.04325
Alcedo hercules	Alcedinidae	0.0625
Alcedo leucogaster	Alcedinidae	0.0145
Alcedo meninting	Alcedinidae	0.0206
Alcedo pusilla	Alcedinidae	0.0133
Alcedo quadribrachys	Alcedinidae	0.0349
Alcedo semitorquata	Alcedinidae	0.048
Alcedo vintsioides	Alcedinidae	0.0179
Alcedo websteri	Alcedinidae	0.06125
Alcippe brunnea	Timaliidae	0.0187
Alcippe brunneicauda	Timaliidae	0.0143
Alcippe castaneceps	Timaliidae	0.0125
Alcippe chrysotis	Timaliidae	0.0055
Alcippe cinerea	Timaliidae	0.011
Alcippe cinereiceps	Timaliidae	0.01
Alcippe dubia	Timaliidae	0.0154
Alcippe morrisonia	Timaliidae	0.015
Alcippe nipalensis	Timaliidae	0.0158
Alcippe peracensis	Timaliidae	0.014975
Alcippe poioicephala	Timaliidae	0.0207
Alcippe rufogularis	Timaliidae	0.0136
Alcippe vinipectus	Timaliidae	0.012
Aleadryas rufinucha	Pachycephalidae	0.0405
Alectoris barbara	Phasianidae	0.4185
Alectoris chukar pubescens	Phasianidae	0.5035
Alectoris graeca	Phasianidae	0.615
Alectoris magna	Phasianidae	0.553
Alectoris melanocephala	Phasianidae	0.623
Alectoris philbyi	Phasianidae	0.441
Alectoris rufa	Phasianidae	0.528
Alectroenas madagascariensis	Columbidae	0.173
Alectroenas pulcherrima	Columbidae	0.165
Alectroenas sganzini	Columbidae	0.1585
Alectrurus tricolor	Tyrannidae	0.016
Alectura lathami	Megapodiidae	2.34
Alethe castanea	Turdidae	0.0323
Alethe choloensis	Turdidae	0.0413
Alethe diademata	Turdidae	0.0312
Alethe fuelleborni	Turdidae	0.052
Alethe poliocephala compsonota	Turdidae	0.0373
Alethe poliocephala nandensis	Turdidae	0.0281
Alethe poliophrys	Turdidae	0.0352
Alisterus amboinensis	Psittacidae	0.153
Alisterus chloropterus	Psittacidae	0.156
Alisterus scapularis	Psittacidae	0.2325
Alle alle alle	Alcidae	0.171
Alle alle polaris	Alcidae	0.202
Allenia fusca	Mimidae	0.067225
Alophoixus affinis	Pycnonotidae	0.0405
Alophoixus bres	Pycnonotidae	0.0339333
Alophoixus finschii	Pycnonotidae	0.0242
Alophoixus flaveolus	Pycnonotidae	0.04565
Alophoixus ochraceus	Pycnonotidae	0.0415
Alophoixus pallidus	Pycnonotidae	0.0465
Alophoixus phaeocephalus	Pycnonotidae	0.032
Alopochen aegyptiana	Anatidae	2.11
Amadina erythrocephala	Estrildidae	0.0226
Amadina fasciata	Estrildidae	0.018
Amalocichla incerta	Petroicidae	0.0292
Amandava amandava	Estrildidae	0.0096
Amandava amandava flavidiventris	Estrildidae	0.0084
Amandava subflava	Estrildidae	0.00745
Amaurolimnas concolor	Rallidae	0.133
Amaurornis akool	Rallidae	0.1335
Amaurornis flavirostra	Rallidae	0.0862
Amaurornis moluccana	Rallidae	0.187
Amaurornis olivacea	Rallidae	0.292
Amaurornis phoenicurus	Rallidae	0.18
Amaurospiza carrizalensis	Emberizidae	0.0133
Amaurospiza concolor	Emberizidae	0.0131
Amaurospiza moesta	Emberizidae	0.0136
Amazilia alticola	Trochilidae	0.0043
Amazilia amazilia	Trochilidae	0.0043
Amazilia amazilia azuay	Trochildidae	0.0074
Amazilia castaneiventris	Trochilidae	0.005
Amazilia rutila	Trochilidae	0.005
Amazilia rutila graysoni	Trochilidae	0.0055
Amazilia tzacatl	Trochilidae	0.0048
Amazilia yucatanensis	Trochilidae	0.0039
Amazona aestiva	Psittacidae	0.451
Amazona agilis	Psittacidae	0.213
Amazona albifrons	Psittacidae	0.206
Amazona amazonica	Psittacidae	0.37
Amazona auropalliata	Psittacidae	0.48
Amazona autumnalis	Psittacidae	0.416
Amazona barbadensis	Psittacidae	0.27
Amazona collaria	Psittacidae	0.187
Amazona dufresniana	Psittacidae	0.623
Amazona farinosa	Psittacidae	0.626
Amazona festiva	Psittacidae	0.43
Amazona finschi	Psittacidae	0.302
Amazona guildingii	Psittacidae	0.646
Amazona leucocephala	Psittacidae	0.2355
Amazona mercenaria	Psittacidae	0.34
Amazona ochrocephala	Psittacidae	0.44
Amazona oratrix	Psittacidae	0.517
Amazona pretrei	Psittacidae	0.275
Amazona rhodocorytha	Psittacidae	0.475
Amazona tucumana	Psittacidae	0.26
Amazona ventralis	Psittacidae	0.214
Amazona versicolor	Psittacidae	0.676
Amazona vinacea	Psittacidae	0.254
Amazona viridigenalis	Psittacidae	0.316
Amazona vittata	Psittacidae	0.281
Amazona xantholora	Psittacidae	0.217
Amazonetta brasiliensis	Anatidae	0.5
Amblycercus holosericeus	Icteridae	0.0717667
Amblyornis flavifrons	Ptilonorhynchidae	0.118
Amblyornis inornatus	Ptilonorhynchidae	0.124
Amblyornis macgregoriae	Ptilonorhynchidae	0.1175
Amblyornis subalaris	Ptilonorhynchidae	0.109
Amblyospiza albifrons albifrons	Ploceidae	0.04595
Amblyospiza albifrons melanota	Ploceidae	0.0374
Amblyospiza albifrons unicolor	Ploceidae	0.0425
Amblyramphus holosericeus	Icteridae	0.05735
Ammodramus aurifrons	Emberizidae	0.0178
Ammodramus bairdii	Emberizidae	0.0180667
Ammodramus caudacutus	Emberizidae	0.01925
Ammodramus henslowii	Emberizidae	0.0128
Ammodramus humeralis	Emberizidae	0.016
Ammodramus lecontei	Emberizidae	0.013
Ammodramus maritimus maritimus	Emberizidae	0.02325
Ammodramus maritimus peninsulae	Emberizidae	0.0212
Ammodramus nelsoni	Emberizidae	0.0151667
Ammodramus savannarum	Emberizidae	0.017
Ammodramus savannarum floridanus	Emberizidae	0.0178
Ammodramus savannarum pratensis	Emberizidae	0.0179
Ammomanes cinctura	Alaudidae	0.01875
Ammomanes deserti	Alaudidae	0.0238
Ammomanes grayi	Alaudidae	0.02145
Ammomanes phoenicura	Alaudidae	0.0256
Ammoperdix griseogularis	Phasianidae	0.203
Ammoperdix heyi	Phasianidae	0.19
Ampeliceps coronatus	Sturnidae	0.0885
Ampelioides tschudii	Cotingidae	0.0784
Ampelion rubrocristatus	Cotingidae	0.0663
Ampelion rufaxilla	Cotingidae	0.0739
Amphispiza belli belli	Emberizidae	0.015
Amphispiza belli nevadensis	Emberizidae	0.0181
Amphispiza bilineata	Emberizidae	0.0135
Amytornis ballarae	Maluridae	0.0209
Amytornis barbatus	Maluridae	0.0184
Amytornis dorotheae	Maluridae	0.02325
Amytornis goyderi	Maluridae	0.0167
Amytornis housei	Maluridae	0.02895
Amytornis merrotsyi	Maluridae	0.0225
Amytornis purnelli purnelli	Maluridae	0.021
Amytornis striatus	Maluridae	0.01965
Amytornis textilis	Maluridae	0.02305
Amytornis woodwardi	Maluridae	0.0351
Anabacerthia amaurotis	Furnariidae	0.0192
Anabacerthia striaticollis	Furnariidae	0.0248
Anabacerthia variegaticeps	Furnariidae	0.0278
Anabathmis hartlaubii	Nectariniidae	0.0105
Anabathmis newtonii	Nectariniidae	0.0065
Anabathmis reichenbachii	Nectariniidae	0.0114
Anabazenops dorsalis	Furnariidae	0.0354
Anabazenops fuscus	Furnariidae	0.0384
Anairetes agilis	Tyrannidae	0.0101
Anairetes agraphia	Tyrannidae	0.0099
Anairetes alpinus bolivianus	Tyrannidae	0.009
Anairetes flavirostris	Tyrannidae	0.006
Anairetes nigrocristatus	Tyrannidae	0.0092
Anairetes parulus	Tyrannidae	0.0062
Anairetes reguloides	Tyrannidae	0.0059
Anaplectes rubriceps	Ploceidae	0.0226
Anarhynchus frontalis	Charadriidae	0.05765
Anas acuta	Anatidae	0.9465
Anas albogularis	Anatidae	0.37
Anas americana	Anatidae	0.7555
Anas aucklandica	Anatidae	0.4655
Anas bahamensis	Anatidae	0.5185
Anas bahamensis galapagensis	Anatidae	0.438
Anas bernieri	Anatidae	0.3785
Anas capensis	Anatidae	0.400333
Anas castanea	Anatidae	0.625
Anas chlorotis	Anatidae	0.582
Anas clypeata	Anatidae	0.613
Anas crecca carolinensis	Anatidae	0.341
Anas crecca crecca	Anatidae	0.3055
Anas crecca nimia	Anatidae	0.385
Anas cyanoptera	Anatidae	0.3775
Anas cyanoptera cyanoptera	Anatidae	0.404
Anas cyanoptera orinomus	Anatidae	0.475
Anas discors	Anatidae	0.36
Anas eatoni	Anatidae	0.571
Anas erythrorhyncha	Anatidae	0.5595
Anas falcata	Anatidae	0.649
Anas flavirostris	Anatidae	0.434
Anas formosa	Anatidae	0.434
Anas fulvigula	Anatidae	0.9885
Anas georgica georgica	Anatidae	0.5835
Anas georgica spinicauda	Anatidae	0.718
Anas gibberifrons	Anatidae	0.4885
Anas gracilis	Anatidae	0.4815
Anas hottentota	Anatidae	0.265
Anas laysanensis	Anatidae	0.4595
Anas luzonica	Anatidae	0.834
Anas melleri	Anatidae	0.9605
Anas nesiotis	Anatidae	0.426
Anas penelope	Anatidae	0.7715
Anas platalea	Anatidae	0.4655
Anas platyrhynchos	Anatidae	1.141
Anas platyrhynchos diazi	Anatidae	0.95625
Anas poecilorhyncha	Anatidae	1.22
Anas puna	Anatidae	0.554
Anas querquedula	Anatidae	0.326
Anas rhynchotis	Anatidae	0.667
Anas rhynchotis variegata	Anatidae	0.6255
Anas rubripes	Anatidae	1.25
Anas sibilatrix	Anatidae	0.9335
Anas smithii	Anatidae	0.5875
Anas sparsa	Anatidae	0.9825
Anas specularioides	Anatidae	0.999
Anas specularis	Anatidae	1.4965
Anas strepera	Anatidae	0.917
Anas superciliosa	Anatidae	1.074
Anas superciliosa	Anatidae	1.035
Anas superciliosa pelewensis	Anatidae	0.621
Anas undulata	Anatidae	0.932
Anas versicolor	Anatidae	0.617
Anas wyvilliana	Anatidae	0.6145
Anas zonorhyncha	Anatidae	1.0105
Anastomus lamelligerus	Ciconiidae	1.081
Ancistrops strigilatus	Furnariidae	0.0359
Andigena cucullata	Ramphastidae	0.312
Andigena hypoglauca lateralis	Ramphastidae	0.314
Andigena laminirostris	Ramphastidae	0.311
Andigena nigrirostris	Ramphastidae	0.35
Androdon aequatorialis	Trochilidae	0.0073
Andropadus ansorgei	Pycnonotidae	0.0187
Andropadus curvirostris	Pycnonotidae	0.0249
Andropadus gracilirostris	Pycnonotidae	0.03125
Andropadus gracilis	Pycnonotidae	0.02165
Andropadus importunus	Pycnonotidae	0.0274
Andropadus latirostris	Pycnonotidae	0.0262
Andropadus masukuensis	Pycnonotidae	0.0268
Andropadus milanjensis	Pycnonotidae	0.0374
Andropadus montanus	Pycnonotidae	0.0326
Andropadus nigriceps fusciceps	Pycnonotidae	0.0373
Andropadus nigriceps kikuyuensis	Pycnonotidae	0.0331
Andropadus tephrolaemus bamendae	Pycnonotidae	0.0383
Andropadus virens	Pycnonotidae	0.0266
Anhima cornuta	Anhimidae	3.15
Anhinga anhinga	Anhingidae	1.235
Anhinga melanogaster	Anhingidae	1.34
Anhinga melanogaster melanogaster	Anhingidae	1.34
Anhinga melanogaster novaehollandiae	Anhingidae	1.65
Anhinga melanogaster rufa	Anhingidae	1.3965
Anhinga novaehollandiae	Anhingidae	1.65
Anhinga rufa	Anhingidae	1.3965
Anisognathus igniventris	Thraupidae	0.034
Anisognathus lacrymosus	Thraupidae	0.031
Anisognathus lacrymosus olivaceiceps	Thraupidae	0.0374
Anisognathus lacrymosus palpebrosus	Thraupidae	0.0353
Anisognathus lacrymosus yariguierum	Thraupidae	0.0359
Anisognathus melanogenys	Thraupidae	0.04075
Anisognathus notabilis	Thraupidae	0.0572
Anisognathus somptuosus flavinuchus	Thraupidae	0.042
Anodorhynchus hyacinthinus	Psittacidae	1.331
Anodorhynchus leari	Psittacidae	0.94
Anomalospiza imberbis	Viduidae	0.02055
Anorrhinus austeni	Bucerotidae	0.933
Anorrhinus galeritus	Bucerotidae	1.172
Anorrhinus tickelli	Bucerotidae	0.796
Anous minutus	Sternidae	0.116
Anous minutus marcusi	Sternidae	0.109
Anous stolidus pileatus	Sternidae	0.189
Anous stolidus stolidus	Sternidae	0.1725
Anous tenuirostris	Sternidae	0.112
Anser albifrons frontalis	Anatidae	2.2115
Anser albifrons gambeli	Anatidae	2.85
Anser anser	Anatidae	3.3085
Anser brachyrhynchus	Anatidae	2.645
Anser cygnoides	Anatidae	3.5125
Anser erythropus	Anatidae	1.761
Anser fabalis fabalis	Anatidae	3.0205
Anser fabalis rossicus	Anatidae	2.521
Anser indicus	Anatidae	2.225
Anser serrirostris rossicus	Anatidae	2.521
Anseranas semipalmata	Anatidae	2.4185
Anthobaphes violacea	Nectariniidae	0.0094
Anthochaera carunculata	Meliphagidae	0.10635
Anthochaera chrysoptera	Meliphagidae	0.06835
Anthochaera lunulata	Meliphagidae	0.06245
Anthochaera paradoxa	Meliphagidae	0.1455
Anthornis melanura	Meliphagidae	0.02715
Anthoscopus caroli	Remizidae	0.0069
Anthoscopus flavifrons	Remizidae	0.008
Anthoscopus minutus	Remizidae	0.0066
Anthoscopus musculus	Remizidae	0.0052
Anthoscopus parvulus	Remizidae	0.0058
Anthoscopus punctifrons	Remizidae	0.007
Anthracoceros albirostris albirostris	Bucerotidae	0.6805
Anthracoceros albirostris convexus	Bucerotidae	0.893
Anthracoceros coronatus	Bucerotidae	0.8085
Anthracoceros malayanus	Bucerotidae	1.05
Anthracoceros marchei	Bucerotidae	0.657
Anthracoceros montani	Bucerotidae	0.671
Anthracothorax dominicus	Trochilidae	0.0058
Anthracothorax mango	Trochilidae	0.0083
Anthracothorax nigricollis	Trochilidae	0.007
Anthracothorax prevostii	Trochilidae	0.0064
Anthracothorax viridigula	Trochilidae	0.0075
Anthracothorax viridis	Trochilidae	0.0066
Anthreptes anchietae	Nectariniidae	0.008
Anthreptes aurantius	Nectariniidae	0.0125
Anthreptes griseigularis birgitae	Nectariniidae	0.015
Anthreptes longuemarei nyassae	Nectariniidae	0.01145
Anthreptes malacensis	Nectariniidae	0.01135
Anthreptes neglectus	Nectariniidae	0.01185
Anthreptes orientalis	Nectariniidae	0.0103
Anthreptes rectirostris	Nectariniidae	0.0106
Anthreptes reichenowi reichenowi	Nectariniidae	0.0074
Anthreptes reichenowi yokanae	Nectariniidae	0.0072
Anthreptes rhodolaemus	Nectariniidae	0.0131
Anthreptes rubritorques	Nectariniidae	0.0107
Anthreptes seimundi	Nectariniidae	0.00665
Anthreptes simplex	Nectariniidae	0.00895
Anthropoides virgo	Gruidae	2.417
Anthus antarcticus	Motacillidae	0.0361
Anthus berthelotii	Motacillidae	0.0159
Anthus bogotensis	Motacillidae	0.0251
Anthus brachyurus	Motacillidae	0.0153
Anthus caffer	Motacillidae	0.0168
Anthus campestris	Motacillidae	0.023
Anthus cervinus	Motacillidae	0.0209
Anthus chloris	Motacillidae	0.0251
Anthus cinnamomeus	Motacillidae	0.027
Anthus correndera	Motacillidae	0.0209
Anthus crenatus	Motacillidae	0.0307
Anthus furcatus	Motacillidae	0.02025
Anthus godlewskii	Motacillidae	0.02535
Anthus gustavi menzbieri	Motacillidae	0.0198
Anthus gutturalis	Motacillidae	0.0363
Anthus hellmayri	Motacillidae	0.01875
Anthus hodgsoni	Motacillidae	0.0213
Anthus hoeschi	Motacillidae	0.027
Anthus leucophrys leucophrys	Motacillidae	0.0232
Anthus leucophrys omoensis	Motacillidae	0.0269
Anthus lineiventris	Motacillidae	0.035
Anthus longicaudatus	Motacillidae	0.0322
Anthus lutescens	Motacillidae	0.01405
Anthus melindae	Motacillidae	0.0225
Anthus nattereri	Motacillidae	0.0195
Anthus novaeseelandiae australis	Motacillidae	0.0258
Anthus novaeseelandiae lacuum	Motacillidae	0.0229
Anthus novaeseelandiae lugubris	Motacillidae	0.0242
Anthus novaeseelandiae rufuloides	Motacillidae	0.0235
Anthus nyassae	Motacillidae	0.02485
Anthus petrosus	Motacillidae	0.0224
Anthus pratensis	Motacillidae	0.0184
Anthus pseudosimilis	Motacillidae	0.0316
Anthus richardi	Motacillidae	0.0322
Anthus roseatus	Motacillidae	0.021
Anthus rubescens	Motacillidae	0.02085
Anthus rubescens alticola	Motacillidae	0.02055
Anthus rufulus	Motacillidae	0.02055
Anthus similis	Motacillidae	0.0253
Anthus sokokensis	Motacillidae	0.015
Anthus spinoletta	Motacillidae	0.0239
Anthus spragueii	Motacillidae	0.0255
Anthus sylvanus	Motacillidae	0.031
Anthus trivialis trivialis	Motacillidae	0.0234
Anthus vaalensis	Motacillidae	0.027
Antilophia bokermanni	Pipridae	0.01975
Antilophia galeata	Pipridae	0.0215
Anumbius annumbi	Furnariidae	0.0415
Anurolimnas castaneiceps	Rallidae	0.126
Anurolimnas viridis	Rallidae	0.0645
Anurophasis monorthonyx	Phasianidae	0.401
Apalis alticola	Cisticolidae	0.0121
Apalis binotata	Cisticolidae	0.0082
Apalis chapini	Cisticolidae	0.0088
Apalis chirindensis	Cisticolidae	0.0086
Apalis cinerea	Cisticolidae	0.0099
Apalis flavida	Cisticolidae	0.0082
Apalis flavigularis	Cisticolidae	0.01105
Apalis fuscigularis	Cisticolidae	0.011
Apalis jacksoni	Cisticolidae	0.0087
Apalis karamojae	Cisticolidae	0.0092
Apalis lynesi	Cisticolidae	0.0114
Apalis melanocephala	Cisticolidae	0.0088
Apalis nigriceps	Cisticolidae	0.0084
Apalis personata	Cisticolidae	0.011
Apalis porphyrolaema	Cisticolidae	0.0084
Apalis pulchra	Cisticolidae	0.0084
Apalis ruddi fomosa	Cisticolidae	0.0097
Apalis rufogularis	Cisticolidae	0.00835
Apalis ruwenzori	Cisticolidae	0.0099
Apalis sharpii	Cisticolidae	0.0087
Apalis thoracica	Cisticolidae	0.0121
Apalis thoracica arnoldi	Cisticolidae	0.0105
Apalis thoracica flavigularis	Cisticolidae	0.01105
Apalis thoracica lynesi	Cisticolidae	0.0114
Apaloderma narina	Trogonidae	0.06775
Apaloderma vittatum	Trogonidae	0.055
Apalopteron familiare	Meliphagidae	0.015
Aphanotriccus audax	Tyrannidae	0.01125
Aphanotriccus capitalis	Tyrannidae	0.0118
Aphelocephala leucopsis castaneiventris	Acanthizidae	0.0114
Aphelocephala leucopsis leucopsis	Acanthizidae	0.0133
Aphelocephala nigricincta	Acanthizidae	0.0104
Aphelocephala pectoralis	Acanthizidae	0.009
Aphelocoma californica hypoleuca	Corvidae	0.08085
Aphelocoma californica nevadae	Corvidae	0.07705
Aphelocoma californica oocleptica	Corvidae	0.08965
Aphelocoma californica sumichrasti	Corvidae	0.0973
Aphelocoma coerulescens	Corvidae	0.07715
Aphelocoma insularis	Corvidae	0.116
Aphelocoma ultramarina	Corvidae	0.130667
Aphelocoma ultramarina couchii	Corvidae	0.0985
Aphelocoma unicolor	Corvidae	0.124
Aphrastura spinicauda	Furnariidae	0.0110333
Aphriza virgata	Scolopacidae	0.2015
Aphrodroma brevirostris	Procellariidae	0.357
Aplonis atrifusca	Sturnidae	0.146
Aplonis brunneicapillus	Sturnidae	0.0667
Aplonis cantoroides	Sturnidae	0.05575
Aplonis cinerascens	Sturnidae	0.0829
Aplonis dichroa	Sturnidae	0.08405
Aplonis feadensis	Sturnidae	0.072
Aplonis grandis	Sturnidae	0.134
Aplonis insularis	Sturnidae	0.07
Aplonis magna	Sturnidae	0.19
Aplonis metallica nitida	Sturnidae	0.0565
Aplonis minor	Sturnidae	0.042
Aplonis mysolensis	Sturnidae	0.062
Aplonis opaca	Sturnidae	0.083
Aplonis opaca ponapensis	Sturnidae	0.07565
Aplonis panayensis	Sturnidae	0.0562
Aplonis striata	Sturnidae	0.0542
Aplonis tabuensis	Sturnidae	0.0625
Aprosmictus erythropterus	Psittacidae	0.136
Aprosmictus jonquillaceus	Psittacidae	0.119
Aptenodytes forsteri	Spheniscidae	33.85
Aptenodytes patagonicus	Spheniscidae	11.751
Apteryx australis	Apterygidae	2.33
Apteryx australis lawryi	Apterygidae	2.9175
Apteryx haastii	Apterygidae	2.055
Apteryx mantelli	Apterygidae	2.725
Apteryx owenii	Apterygidae	1.243
Apteryx rowi	Apterygidae	2.287
Apus affinis affinis	Apodidae	0.0179
Apus affinis bannermani	Apodidae	0.0239
Apus affinis kuntzi	Apodidae	0.0236
Apus affinis theresae	Apodidae	0.0249
Apus apus	Apodidae	0.0376
Apus balstoni	Apodidae	0.0461
Apus barbatus	Apodidae	0.0428
Apus berliozi	Apodidae	0.0382
Apus bradfieldi	Apodidae	0.0424
Apus caffer	Apodidae	0.0221
Apus horus horus	Apodidae	0.0275
Apus niansae	Apodidae	0.0325
Apus nipalensis	Apodidae	0.0304
Apus pacificus	Apodidae	0.0399
Apus pallidus	Apodidae	0.0419
Apus unicolor	Apodidae	0.0225
Aquila adalberti	Accipitridae	3
Aquila audax	Accipitridae	3.466
Aquila chrysaetos	Accipitridae	4.2635
Aquila clanga	Accipitridae	2.2055
Aquila gurneyi	Accipitridae	3.06
Aquila heliaca	Accipitridae	3.215
Aquila nipalensis	Accipitridae	2.725
Aquila pomarina	Accipitridae	1.4
Aquila rapax rapax	Accipitridae	2.04333
Aquila verreauxii	Accipitridae	4.13167
Aquila wahlbergi	Accipitridae	0.64
Ara ambiguus	Psittacidae	1.3
Ara ararauna	Psittacidae	1.125
Ara chloropterus	Psittacidae	1.214
Ara glaucogularis	Psittacidae	0.784
Ara macao	Psittacidae	1.015
Ara militaris	Psittacidae	1.134
Ara rubrogenys	Psittacidae	0.468
Ara severus	Psittacidae	0.343
Arachnothera affinis	Nectariniidae	0.0264
Arachnothera chrysogenys	Nectariniidae	0.0228
Arachnothera clarae	Nectariniidae	0.0301
Arachnothera crassirostris	Nectariniidae	0.016
Arachnothera flavigaster	Nectariniidae	0.04275
Arachnothera longirostra	Nectariniidae	0.01255
Arachnothera magna	Nectariniidae	0.0307
Arachnothera modesta	Nectariniidae	0.0227
Arachnothera robusta	Nectariniidae	0.02615
Aramides axillaris	Rallidae	0.292
Aramides cajanea	Rallidae	0.397
Aramides mangle	Rallidae	0.183
Aramides saracura	Rallidae	0.54
Aramides wolfi	Rallidae	0.474
Aramides ypecaha	Rallidae	0.701
Aramus guarauna	Aramidae	1.08
Aratinga acuticaudata	Psittacidae	0.171
Aratinga aurea	Psittacidae	0.08465
Aratinga auricapilla	Psittacidae	0.13
Aratinga brevipes	Psittacidae	0.177
Aratinga canicularis	Psittacidae	0.085
Aratinga chloroptera	Psittacidae	0.146
Aratinga erythrogenys	Psittacidae	0.151
Aratinga finschi	Psittacidae	0.15
Aratinga holochlora	Psittacidae	0.138
Aratinga jandaya	Psittacidae	0.0894
Aratinga leucophthalma	Psittacidae	0.158
Aratinga mitrata	Psittacidae	0.249
Aratinga nana	Psittacidae	0.0769
Aratinga pertinax	Psittacidae	0.084
Aratinga pintoi	Psittacidae	0.11
Aratinga rubritorquis	Psittacidae	0.212
Aratinga solstitialis	Psittacidae	0.1205
Aratinga strenua	Psittacidae	0.208
Aratinga wagleri	Psittacidae	0.194
Aratinga weddellii	Psittacidae	0.108
Arborophila ardens	Phasianidae	0.2685
Arborophila atrogularis	Phasianidae	0.238
Arborophila brunneopectus	Phasianidae	0.2925
Arborophila cambodiana	Phasianidae	0.2875
Arborophila cambodiana chandamonyi	Phasianidae	0.283
Arborophila campbelli	Phasianidae	0.271
Arborophila charltonii	Phasianidae	0.27
Arborophila chloropus	Phasianidae	0.27
Arborophila crudigularis	Phasianidae	0.2615
Arborophila davidi	Phasianidae	0.241
Arborophila gingica	Phasianidae	0.253
Arborophila hyperythra	Phasianidae	0.27
Arborophila javanica	Phasianidae	0.272
Arborophila mandellii	Phasianidae	0.268
Arborophila merlini	Phasianidae	0.27
Arborophila orientalis	Phasianidae	0.336
Arborophila rubrirostris	Phasianidae	0.226
Arborophila rufipectus	Phasianidae	0.4025
Arborophila rufogularis	Phasianidae	0.3505
Arborophila torqueola	Phasianidae	0.3505
Arcanator orostruthus	Timaliidae	0.0327
Archboldia papuensis papuensis	Ptilonorhynchidae	0.173
Archboldia papuensis sanfordi	Ptilonorhynchidae	0.18
Archilochus alexandri	Trochilidae	0.0034
Archilochus colubris	Trochilidae	0.0031
Ardea alba	Ardeidae	0.8735
Ardea cinerea	Ardeidae	1.443
Ardea cocoi	Ardeidae	1.93767
Ardea goliath	Ardeidae	4.468
Ardea herodias	Ardeidae	2.295
Ardea herodias occidentalis	Ardeidae	2.7925
Ardea melanocephala	Ardeidae	1.2545
Ardea pacifica	Ardeidae	0.881
Ardea purpurea	Ardeidae	0.969625
Ardea sumatrana	Ardeidae	2.024
Ardeola bacchus	Ardeidae	0.306
Ardeola grayii	Ardeidae	0.263
Ardeola ralloides	Ardeidae	0.287
Ardeotis arabs	Otididae	6.175
Ardeotis australis	Otididae	4.45
Ardeotis kori	Otididae	8.46
Ardeotis kori struthiunculus	Otididae	8.4
Ardeotis nigriceps	Otididae	8.1875
Arenaria interpres	Scolopacidae	0.136
Arenaria melanocephala	Scolopacidae	0.1265
Argusianus argus	Phasianidae	1.994
Arremon abeillei	Emberizidae	0.0259
Arremon aurantiirostris	Emberizidae	0.0345
Arremon flavirostris	Emberizidae	0.0309
Arremon flavirostris dorbignii	Emberizidae	0.0221
Arremon franciscanus	Emberizidae	0.0249
Arremon schlegeli	Emberizidae	0.0277
Arremon semitorquatus	Emberizidae	0.0265
Arremon taciturnus	Emberizidae	0.0248
Arremonops chloronotus	Emberizidae	0.0274
Arremonops conirostris	Emberizidae	0.0363
Arremonops rufivirgatus	Emberizidae	0.02245
Arses insularis	Monarchidae	0.0193
Arses kaupi	Monarchidae	0.0135
Arses lorealis	Monarchidae	0.0137
Arses telescophthalmus	Monarchidae	0.01455
Artamella viridis	Vangidae	0.0488
Artamus cinereus	Artamidae	0.0356
Artamus cyanopterus	Artamidae	0.0346
Artamus fuscus	Artamidae	0.0398
Artamus insignis	Artamidae	0.0513
Artamus leucorynchus	Artamidae	0.0417
Artamus maximus	Artamidae	0.0582
Artamus mentalis	Artamidae	0.0419
Artamus minor	Artamidae	0.016
Artamus personatus	Artamidae	0.0346
Artamus superciliosus	Artamidae	0.0355
Arundinicola leucocephala	Tyrannidae	0.0138
Ashbyia lovensis	Epthianuridae	0.0175
Asio abyssinicus	Strigidae	0.3225
Asio capensis	Strigidae	0.334
Asio flammeus	Strigidae	0.325
Asio otus	Strigidae	0.299
Asio stygius	Strigidae	0.565
Aspatha gularis	Momotidae	0.0627
Asthenes anthoides	Furnariidae	0.0223
Asthenes baeri	Furnariidae	0.0178
Asthenes cactorum	Furnariidae	0.0175
Asthenes dorbignyi	Furnariidae	0.0159
Asthenes flammulata	Furnariidae	0.0225
Asthenes heterura	Furnariidae	0.0135
Asthenes humicola	Furnariidae	0.0225
Asthenes humicola goodalli	Furnariidae	0.0193
Asthenes humilis	Furnariidae	0.021
Asthenes luizae	Furnariidae	0.0289
Asthenes maculicauda	Furnariidae	0.019
Asthenes modesta	Furnariidae	0.0168
Asthenes ottonis	Furnariidae	0.013
Asthenes patagonica	Furnariidae	0.0164
Asthenes pudibunda	Furnariidae	0.015
Asthenes pyrrholeuca	Furnariidae	0.0132
Asthenes sclateri	Furnariidae	0.0259
Asthenes steinbachi	Furnariidae	0.0195
Asthenes urubambensis	Furnariidae	0.016
Asthenes virgata	Furnariidae	0.022
Asthenes wyatti	Furnariidae	0.0152
Astrapia mayeri	Paradisaeidae	0.1395
Astrapia nigra	Paradisaeidae	0.19
Astrapia rothschildi	Paradisaeidae	0.183
Astrapia splendidissima	Paradisaeidae	0.1315
Astrapia stephaniae	Paradisaeidae	0.142
Atelornis crossleyi	Brachypteraciidae	0.079
Atelornis pittoides	Brachypteraciidae	0.0915
Athene blewitti	Strigidae	0.241
Athene brama	Strigidae	0.112
Athene cunicularia floridana	Strigidae	0.15
Athene cunicularia hypugaea	Strigidae	0.151
Athene noctua	Strigidae	0.169
Atlantisia rogersi	Rallidae	0.03935
Atlapetes albiceps	Emberizidae	0.031
Atlapetes albinucha	Emberizidae	0.0331
Atlapetes albinucha gutturalis	Emberizidae	0.0346
Atlapetes albofrenatus albofrenatus	Emberizidae	0.03
Atlapetes citrinellus	Emberizidae	0.028
Atlapetes fulviceps	Emberizidae	0.0282
Atlapetes fuscoolivaceus	Emberizidae	0.0325
Atlapetes latinuchus elaeoprorus	Emberizidae	0.0282
Atlapetes latinuchus nigrifrons	Emberizidae	0.031
Atlapetes latinuchus yariguierum	Emberizidae	0.0193
Atlapetes leucopis	Emberizidae	0.043
Atlapetes leucopterus	Emberizidae	0.0208
Atlapetes leucopterus dresseri	Emberizidae	0.0227
Atlapetes leucopterus paynteri	Emberizidae	0.0249
Atlapetes melanocephalus	Emberizidae	0.025
Atlapetes nationi	Emberizidae	0.0416
Atlapetes pallidinucha	Emberizidae	0.0346
Atlapetes personatus	Emberizidae	0.0327
Atlapetes pileatus	Emberizidae	0.024
Atlapetes rufinucha	Emberizidae	0.02155
Atlapetes schistaceus	Emberizidae	0.0298
Atlapetes schistaceus tamae	Emberizidae	0.0264
Atlapetes semirufus	Emberizidae	0.0307
Atlapetes tricolor	Emberizidae	0.0365
Atrichornis clamosus	Pittidae	0.04305
Atrichornis rufescens	Pittidae	0.024
Attagis gayi	Thinocoridae	0.311
Attagis malouinus	Thinocoridae	0.34
Atthis ellioti	Trochilidae	0.0029
Atthis heloisa	Trochilidae	0.0022
Atticora fasciata	Hirundinidae	0.013
Atticora melanoleuca	Hirundinidae	0.0108
Attila bolivianus	Tyrannidae	0.0395
Attila cinnamomeus	Tyrannidae	0.0388
Attila citriniventris	Tyrannidae	0.0337
Attila phoenicurus	Tyrannidae	0.0323
Attila rufus	Tyrannidae	0.0426
Attila spadiceus	Tyrannidae	0.0391
Attila torridus	Tyrannidae	0.046
Augastes geoffroyi	Trochilidae	0.0036
Augastes lumachella	Trochilidae	0.004
Augastes scutatus	Trochilidae	0.003
Aulacorhynchus albivitta	Rhamphastidae	0.189
Aulacorhynchus atrogularis	Rhamphastidae	0.1555
Aulacorhynchus caeruleogularis	Rhamphastidae	0.145
Aulacorhynchus coeruleicinctis	Ramphastidae	0.208
Aulacorhynchus cognatus	Rhamphastidae	0.1635
Aulacorhynchus derbianus	Ramphastidae	0.21
Aulacorhynchus haematopygus haematopygus	Ramphastidae	0.213
Aulacorhynchus haematopygus sexnotatus	Ramphastidae	0.171
Aulacorhynchus huallagae	Ramphastidae	0.269
Aulacorhynchus prasinus caeruleogularis	Ramphastidae	0.145
Aulacorhynchus prasinus prasinus	Ramphastidae	0.187
Aulacorhynchus prasinus wagleri	Ramphastidae	0.183
Aulacorhynchus sulcatus	Ramphastidae	0.167
Aulacorhynchus wagleri	Rhamphastidae	0.183
Auriparus flaviceps	Remizidae	0.0068
Automolus infuscatus	Furnariidae	0.0329
Automolus leucophthalmus	Furnariidae	0.0345
Automolus melanopezus	Furnariidae	0.0314
Automolus ochrolaemus	Furnariidae	0.0402
Automolus roraimae	Furnariidae	0.027
Automolus rubiginosus	Furnariidae	0.0398
Automolus rufipileatus	Furnariidae	0.0348
Aviceda cuculoides	Accipitridae	0.277
Aviceda jerdoni	Accipitridae	0.363
Aviceda leuphotes	Accipitridae	0.196
Aviceda subcristata	Accipitridae	0.327
Aviceda subcristata gurneyi	Accipitridae	0.319
Avocettula recurvirostris	Trochilidae	0.0042
Aythya affinis	Anatidae	0.82
Aythya americana	Anatidae	1.0765
Aythya australis	Anatidae	0.87
Aythya baeri	Anatidae	0.6825
Aythya collaris	Anatidae	0.705
Aythya ferina	Anatidae	0.823
Aythya fuligula	Anatidae	0.7015
Aythya innotata	Anatidae	0.685
Aythya marila	Anatidae	1.0065
Aythya novaeseelandiae	Anatidae	0.682
Aythya nyroca	Anatidae	0.574
Aythya valisineria	Anatidae	1.203
Babax koslowi	Timaliidae	0.1125
Babax lanceolatus	Timaliidae	0.068
Babax waddelli	Timaliidae	0.142
Baeolophus atricristatus	Paridae	0.0175
Baeolophus bicolor bicolor	Paridae	0.0216
Baeolophus inornatus affabilis	Paridae	0.0167
Baeolophus inornatus cineraceus	Paridae	0.01535
Baeolophus inornatus inornatus	Paridae	0.01595
Baeolophus inornatus mohavensis	Paridae	0.01555
Baeolophus ridgwayi ridgwayi	Paridae	0.01615
Baeolophus ridgwayi zaleptus	Paridae	0.0153
Baeolophus wollweberi	Paridae	0.0104
Baeopogon indicator	Pycnonotidae	0.04585
Baillonius bailloni	Ramphastidae	0.146
Balaeniceps rex	Balaenicipididae	5.984
Balearica pavonina	Gruidae	3.59
Balearica regulorum	Gruidae	3.772
Bambusicola fytchii	Phasianidae	0.3185
Bambusicola thoracicus	Phasianidae	0.27025
Bangsia arcaei	Thraupidae	0.0372
Bangsia aureocincta	Thraupidae	0.0417
Bangsia edwardsi	Thraupidae	0.037
Bangsia melanochlamys	Thraupidae	0.0372
Barnardius barnardi	Psittacidae	0.1335
Barnardius barnardi zonarius	Psittacidae	0.133
Bartramia longicauda	Scolopacidae	0.159
Baryphthengus martii	Momotidae	0.1655
Baryphthengus ruficapillus	Momotidae	0.1425
Basileuterus belli	Parulidae	0.0107
Basileuterus bivittatus	Parulidae	0.0146
Basileuterus chrysogaster	Parulidae	0.0112
Basileuterus cinereicollis	Parulidae	0.0151
Basileuterus conspicillatus	Parulidae	0.01325
Basileuterus coronatus	Parulidae	0.0163
Basileuterus culicivorus	Parulidae	0.0105
Basileuterus flaveolus	Parulidae	0.0132
Basileuterus fraseri	Parulidae	0.0116
Basileuterus fulvicauda	Parulidae	0.0149
Basileuterus hypoleucus	Parulidae	0.0114
Basileuterus ignotus	Parulidae	0.011
Basileuterus leucoblepharus	Parulidae	0.0151
Basileuterus leucophrys	Parulidae	0.0181
Basileuterus luteoviridis	Parulidae	0.01295
Basileuterus melanogenys	Parulidae	0.0118
Basileuterus nigrocristatus	Parulidae	0.01365
Basileuterus rivularis	Parulidae	0.0135
Basileuterus rufifrons	Parulidae	0.0104
Basileuterus signatus	Parulidae	0.0113
Basileuterus trifasciatus	Parulidae	0.0097
Basileuterus tristriatus	Parulidae	0.0127
Basileuterus tristriatus bessereri	Parulidae	0.0114
Basilornis corythaix	Sturnidae	0.126
Basilornis mirandus	Sturnidae	0.108
Batara cinerea	Thamnophilidae	0.131
Bathmocercus cerviniventris	Sylviidae	0.0158
Bathmocercus rufus	Sylviidae	0.01545
Bathmocercus winifredae	Sylviidae	0.0155
Batis capensis	Platysteiridae	0.0116
Batis capensis dimorpha	Platysteiridae	0.0119
Batis crypta	Platysteiridae	0.01205
Batis diops	Platysteiridae	0.0127
Batis erlanger	Platysteiridae	0.0125
Batis fratrum	Platysteiridae	0.01195
Batis margaritae	Platysteiridae	0.0117
Batis minima	Platysteiridae	0.01
Batis minor	Platysteiridae	0.01155
Batis minor erlanger	Platysteiridae	0.0125
Batis minulla	Platysteiridae	0.0099
Batis mixta	Platysteiridae	0.0122
Batis molitor	Platysteiridae	0.01165
Batis occulta	Platysteiridae	0.009
Batis orientalis	Platysteiridae	0.0111
Batis perkeo	Platysteiridae	0.00695
Batis poensis	Platysteiridae	0.0096
Batis pririt	Platysteiridae	0.00935
Batis senegalensis	Platysteiridae	0.00973333
Batis soror	Platysteiridae	0.0095
Batrachostomus auritus	Podargidae	0.206
Batrachostomus hodgsoni	Podargidae	0.051
Batrachostomus javensis affinis	Podargidae	0.0467
Batrachostomus javensis continentalis	Podargidae	0.046
Batrachostomus moniliger	Podargidae	0.05275
Batrachostomus septimus	Podargidae	0.0871
Batrachostomus stellatus	Podargidae	0.05205
Berlepschia rikeri	Furnariidae	0.037
Bias musicus	Platysteiridae	0.0219
Biziura lobata	Anatidae	2.398
Bleda canicapillus	Pycnonotidae	0.0403
Bleda eximius	Pycnonotidae	0.0357
Bleda notatus ugandae	Pycnonotidae	0.0392
Bleda syndactylus	Pycnonotidae	0.04615
Blythipicus pyrrhotis	Picidae	0.131
Blythipicus rubiginosus	Picidae	0.0823
Boissonneaua flavescens	Trochilidae	0.0082
Boissonneaua jardini	Trochilidae	0.0091
Boissonneaua matthewsii	Trochilidae	0.0077
Bolbopsittacus lunulatus	Psittacidae	0.0676
Bolborhynchus ferrugineifrons	Psittacidae	0.064
Bolborhynchus lineola	Psittacidae	0.0562
Bolborhynchus orbygnesius	Psittacidae	0.0431
Bombycilla cedrorum	Bombycillidae	0.0316
Bombycilla garrulus	Bombycillidae	0.05445
Bombycilla japonica	Bombycillidae	0.0423
Bonasa bonasia	Tetraonidae	0.429
Bonasa sewerzowi	Tetraonidae	0.3245
Bonasa umbellus	Tetraonidae	0.532
Bostrychia hagedash	Threskiornithidae	1.24867
Botaurus lentiginosus	Ardeidae	0.706
Botaurus pinnatus	Ardeidae	0.8385
Botaurus poiciloptilus	Ardeidae	1.1105
Botaurus stellaris	Ardeidae	1.3245
Brachycope anomala	Ploceidae	0.0253
Brachygalba goeringi	Galbulidae	0.018
Brachygalba lugubris	Galbulidae	0.0159
Brachygalba salmoni	Galbulidae	0.01725
Brachypteracias leptosomus	Brachypteraciidae	0.185
Brachypteracias squamigera	Brachypteraciidae	0.155
Brachypteryx leucophrys	Turdidae	0.0158
Brachypteryx montana	Turdidae	0.0177
Brachypteryx stellata	Turdidae	0.023
Brachyramphus brevirostris	Alcidae	0.234
Brachyramphus marmoratus	Alcidae	0.22
Brachyramphus perdix	Alcidae	0.296
Bradornis infuscatus	Muscicapidae	0.0324
Bradornis mariquensis	Muscicapidae	0.0252
Bradornis microrhynchus neumanni	Muscicapidae	0.019
Bradornis microrhynchus pumilus	Muscicapidae	0.0205
Bradornis pallidus	Muscicapidae	0.0236
Bradypterus accentor	Sylviidae	0.014
Bradypterus alfredi	Megaluridae	0.01665
Bradypterus alishanensis	Sylviidae	0.01
Bradypterus baboecala	Sylviidae	0.0129
Bradypterus baboecala elgonensis	Megaluridae	0.0121
Bradypterus bangwaensis	Megaluridae	0.021
Bradypterus barratti	Sylviidae	0.0188
Bradypterus carpalis	Sylviidae	0.0224
Bradypterus castaneus	Sylviidae	0.019
Bradypterus caudatus	Sylviidae	0.0229
Bradypterus cinnamomeus	Sylviidae	0.0174
Bradypterus davidi	Sylviidae	0.01005
Bradypterus grandis	Sylviidae	0.0185
Bradypterus graueri	Sylviidae	0.017
Bradypterus lopezi bangwaensis	Sylviidae	0.021
Bradypterus lopezi lopezi	Sylviidae	0.0177
Bradypterus lopezi mariae	Sylviidae	0.0189
Bradypterus luteoventris	Megaluridae	0.01285
Bradypterus major	Sylviidae	0.013
Bradypterus mandelli	Sylviidae	0.01
Bradypterus montis	Sylviidae	0.014
Bradypterus palliseri	Sylviidae	0.009
Bradypterus seebohmi	Sylviidae	0.0113
Bradypterus sylvaticus	Sylviidae	0.021
Bradypterus tacsanowskius	Sylviidae	0.0117
Bradypterus thoracicus	Sylviidae	0.0108
Bradypterus timorensis	Sylviidae	0.011
Bradypterus victorini	Sylviidae	0.01
Branta bernicla hrota	Anatidae	1.2585
Branta bernicla nigricans	Anatidae	1.3
Branta canadensis canadensis	Anatidae	3.564
Branta canadensis interior	Anatidae	3.8475
Branta canadensis maxima	Anatidae	4.8415
Branta canadensis moffitti	Anatidae	4.115
Branta canadensis occidentalis	Anatidae	2.936
Branta canadensis parvipes	Anatidae	3.06
Branta hutchinsii hutchinsii	Anatidae	2.05
Branta hutchinsii leucopareia	Anatidae	1.825
Branta hutchinsii minima	Anatidae	1.372
Branta hutchinsii taverneri	Anatidae	2.5135
Branta leucopsis	Anatidae	1.687
Branta ruficollis	Anatidae	1.2345
Branta sandvicensis	Anatidae	2.0475
Brotogeris chiriri	Psittacidae	0.0616
Brotogeris chrysopterus	Psittacidae	0.0545
Brotogeris cyanoptera	Psittacidae	0.056
Brotogeris jugularis	Psittacidae	0.06325
Brotogeris pyrrhopterus	Psittacidae	0.064
Brotogeris sanctithomae	Psittacidae	0.059
Brotogeris tirica	Psittacidae	0.063
Brotogeris versicolurus	Psittacidae	0.0716
Buarremon brunneinucha	Emberizidae	0.04405
Buarremon torquatus	Emberizidae	0.0407
Buarremon torquatus atricapillus	Emberizidae	0.0446
Buarremon virenticeps	Emberizidae	0.041
Bubalornis albirostris	Ploceidae	0.0619
Bubalornis niger	Ploceidae	0.0764
Bubo africanus	Strigidae	0.645
Bubo ascalaphus	Strigidae	2.1
Bubo bengalensis	Strigidae	1.1
Bubo bubo	Strigidae	2.686
Bubo capensis	Strigidae	1.138
Bubo cinerascens	Strigidae	0.5
Bubo lacteus	Strigidae	2.1645
Bubo leucostictus	Strigidae	0.533
Bubo magellanicus	Strigidae	1.171
Bubo nipalensis	Strigidae	1.4
Bubo poensis	Strigidae	0.6605
Bubo scandiacus	Strigidae	2.0425
Bubo shelleyi	Strigidae	1.257
Bubo sumatranus	Strigidae	1.525
Bubo virginianus pallescens	Strigidae	1.028
Bubo virginianus virginianus	Strigidae	1.3545
Bubo vosseleri	Strigidae	0.848
Bubulcus ibis	Ardeidae	0.335333
Buccanodon duchaillui	Capitonidae	0.0418
Bucco capensis	Bucconidae	0.054
Bucco macrodactylus	Bucconidae	0.025
Bucco noanamae	Bucconidae	0.0428
Bucco tamatia	Bucconidae	0.0355
Bucephala albeola	Anatidae	0.4035
Bucephala clangula	Anatidae	0.9385
Bucephala islandica	Anatidae	0.9405
Buceros bicornis	Bucerotidae	2.7985
Buceros hydrocorax	Bucerotidae	1.411
Buceros rhinoceros	Bucerotidae	2.38
Buceros vigil	Bucerotidae	2.8925
Bucorvus abyssinicus	Bucerotidae	4
Bucorvus leadbeateri	Bucerotidae	3.7675
Buettikoferella bivittata	Sylviidae	0.03
Bugeranus carunculatus	Gruidae	8.159
Bulweria bulwerii	Procellariidae	0.099
Bulweria fallax	Procellariidae	0.173
Buphagus africanus	Sturnidae	0.06025
Buphagus erythrorhynchus	Sturnidae	0.05075
Burhinus bistriatus	Burhinidae	0.787
Burhinus capensis	Burhinidae	0.492
Burhinus grallarius	Burhinidae	0.6485
Burhinus oedicnemus	Burhinidae	0.459
Burhinus senegalensis	Burhinidae	0.326
Burhinus vermiculatus	Burhinidae	0.32
Busarellus nigricollis	Accipitridae	0.785
Butastur indicus	Accipitridae	0.415
Butastur liventer	Accipitridae	0.338
Butastur rufipennis	Accipitridae	0.335
Butastur teesa	Accipitridae	0.325
Buteo albicaudatus	Accipitridae	0.886
Buteo albonotatus	Accipitridae	0.757
Buteo augur	Accipitridae	1.065
Buteo auguralis	Accipitridae	0.67
Buteo brachypterus	Accipitridae	0.511
Buteo brachyurus	Accipitridae	0.5025
Buteo buteo	Accipitridae	0.875
Buteo buteo vulpinus	Accipitridae	0.578
Buteo galapagoensis	Accipitridae	1.16333
Buteo hemilasius	Accipitridae	1.3745
Buteo jamaicensis	Accipitridae	1.126
Buteo jamaicensis calurus	Accipitridae	1.0945
Buteo lagopus	Accipitridae	0.956
Buteo leucorrhous	Accipitridae	0.29
Buteo lineatus lineatus	Accipitridae	0.607
Buteo magnirostris	Accipitridae	0.269
Buteo nitidus	Accipitridae	0.5285
Buteo oreophilus	Accipitridae	0.7
Buteo oreophilus trizonatus	Accipitridae	0.612
Buteo platypterus	Accipitridae	0.455
Buteo poecilochrous	Accipitridae	1.004
Buteo polyosoma	Accipitridae	0.788
Buteo regalis	Accipitridae	1.4695
Buteo ridgwayi	Accipitridae	0.3645
Buteo rufinus	Accipitridae	1.1745
Buteo rufofuscus	Accipitridae	1.165
Buteo solitarius	Accipitridae	0.51
Buteo swainsoni	Accipitridae	0.9585
Buteo ventralis	Accipitridae	1.194
Buteogallus aequinoctialis	Accipitridae	0.6595
Buteogallus anthracinus	Accipitridae	0.996
Buteogallus gundlachi	Accipitridae	0.7365
Buteogallus meridionalis	Accipitridae	0.808
Buteogallus urubitinga	Accipitridae	1.1565
Buthraupis aureodorsalis	Thraupidae	0.085
Buthraupis eximia	Thraupidae	0.0627
Buthraupis montana	Thraupidae	0.096
Buthraupis montana montana	Thraupidae	0.079
Buthraupis wetmorei	Thraupidae	0.0625
Butorides striata	Ardeidae	0.226
Butorides striata carcinophila	Ardeidae	0.184
Butorides striata javanica	Ardeidae	0.1805
Butorides virescens	Ardeidae	0.1995
Cacatua alba	Cacatuidae	0.57
Cacatua ducorpsii	Cacatuidae	0.394
Cacatua galerita fitzroyi	Cacatuidae	0.657
Cacatua galerita galerita	Cacatuidae	0.79
Cacatua goffini	Cacatuidae	0.275
Cacatua haematuropygia	Cacatuidae	0.288
Cacatua leadbeateri leadbeateri	Cacatuidae	0.376
Cacatua leadbeateri mollis	Cacatuidae	0.408
Cacatua moluccensis	Cacatuidae	0.835
Cacatua ophthalmica	Cacatuidae	0.492
Cacatua pastinator derbyi	Cacatuidae	0.5805
Cacatua pastinator pastinator	Cacatuidae	0.75
Cacatua sanguinea	Cacatuidae	0.525
Cacatua sulphurea citrinocristata	Cacatuidae	0.304
Cacatua tenuirostris	Cacatuidae	0.567
Cacicus cela	Icteridae	0.08745
Cacicus chrysopterus	Icteridae	0.03645
Cacicus haemorrhous	Icteridae	0.08535
Cacicus melanicterus	Icteridae	0.0823
Cacicus sclateri	Icteridae	0.049
Cacicus solitarius	Icteridae	0.08005
Cacicus uropygialis	Icteridae	0.06165
Cacomantis castaneiventris	Cuculidae	0.0332
Cacomantis flabelliformis	Cuculidae	0.0498
Cacomantis merulinus	Cuculidae	0.0253
Cacomantis sepulcralis	Cuculidae	0.0334
Cacomantis sonneratii	Cuculidae	0.0338
Cacomantis variolosus addendus	Cuculidae	0.0411
Cacomantis variolosus dumetorum	Cuculidae	0.0333
Cacomantis variolosus sepulcralis	Cuculidae	0.0334
Cairina moschata	Anatidae	2.45
Cairina scutulata	Anatidae	3
Calamanthus campestris campestris	Acanthizidae	0.0149
Calamanthus campestris isabellinus	Acanthizidae	0.013
Calamanthus fuliginosus	Acanthizidae	0.0221
Calamanthus fuliginosus albiloris	Acanthizidae	0.02025
Calamanthus montanellus	Acanthizidae	0.014
Calamonastes fasciolatus	Cisticolidae	0.0131
Calamonastes simplex	Cisticolidae	0.012
Calamonastes undosus	Cisticolidae	0.013
Calamospiza melanocorys	Emberizidae	0.0376
Calandrella acutirostris	Alaudidae	0.02025
Calandrella brachydactyla	Alaudidae	0.02
Calandrella brachydactyla longipennis	Alaudidae	0.0211
Calandrella cheleensis	Alaudidae	0.0222
Calandrella cinerea	Alaudidae	0.0237
Calandrella raytal	Alaudidae	0.0185
Calandrella rufescens	Alaudidae	0.0241
Calcarius lapponicus	Emberizidae	0.02785
Calcarius mccownii	Emberizidae	0.0257
Calcarius ornatus	Emberizidae	0.0203
Calcarius pictus	Emberizidae	0.0267
Calendulalauda africanoides	Alaudidae	0.0234
Calendulalauda albescens	Alaudidae	0.0293333
Calendulalauda alopex	Alaudidae	0.024
Calendulalauda barlowi	Alaudidae	0.02965
Calendulalauda burra	Alaudidae	0.0375
Calendulalauda erythrochlamys	Alaudidae	0.0281
Calendulalauda poecilosterna	Alaudidae	0.0247
Calendulalauda sabota	Alaudidae	0.0247
Calicalicus madagascariensis	Vangidae	0.016
Calicalicus madagascariensis rufocarpalis	Vangidae	0.0168
Calicalicus rufocarpalis	Vangidae	0.0168
Calidris acuminata	Scolopacidae	0.06655
Calidris alba	Scolopacidae	0.0518667
Calidris alpina	Scolopacidae	0.056
Calidris alpina sakhalina	Scolopacidae	0.05755
Calidris alpina schinzii	Scolopacidae	0.0469
Calidris bairdii	Scolopacidae	0.04105
Calidris canutus	Scolopacidae	0.142
Calidris ferruginea	Scolopacidae	0.0594667
Calidris fuscicollis	Scolopacidae	0.0435
Calidris himantopus	Scolopacidae	0.05735
Calidris maritima	Scolopacidae	0.06515
Calidris mauri	Scolopacidae	0.02785
Calidris melanotos	Scolopacidae	0.0814
Calidris minuta	Scolopacidae	0.0211
Calidris minutilla	Scolopacidae	0.0229
Calidris ptilocnemis couesi	Scolopacidae	0.0743
Calidris ptilocnemis ptilocnemis	Scolopacidae	0.0964
Calidris ptilocnemis tschuktschorum	Scolopacidae	0.0756
Calidris pusilla	Scolopacidae	0.0275
Calidris ruficollis	Scolopacidae	0.0315
Calidris ruficollis	Scolopacidae	0.0268
Calidris subminuta	Scolopacidae	0.03065
Calidris temminckii	Scolopacidae	0.02675
Calidris tenuirostris	Scolopacidae	0.152
Caliechthrus leucolophus	Cuculidae	0.1075
Callaeas cinerea	Callaeidae	0.2255
Callipepla californica achrustera	Odontophoridae	0.151
Callipepla californica californica	Odontophoridae	0.174
Callipepla douglasii	Odontophoridae	0.178
Callipepla gambelii	Odontophoridae	0.166
Callipepla squamata	Odontophoridae	0.184
Calliphlox amethystina	Trochilidae	0.0028
Calliphlox bryantae	Trochilidae	0.0033
Calliphlox evelynae	Trochilidae	0.0024
Calliphlox mitchellii	Trochilidae	0.0031
Callocephalon fimbriatum	Cacatuidae	0.256
Callonetta leucophrys	Anatidae	0.3655
Calochaetes coccineus	Thraupidae	0.0464
Calocitta colliei	Corvidae	0.234
Calocitta formosa	Corvidae	0.21
Caloenas nicobarica	Columbidae	0.54
Calonectris diomedea	Procellariidae	0.741667
Calonectris edwardsii	Procellariidae	0.46
Calonectris leucomelas	Procellariidae	0.58
Caloperdix oculeus	Phasianidae	0.21
Calorhamphus fuliginosus	Capitonidae	0.0426
Calothorax lucifer	Trochilidae	0.0033
Calothorax pulcher	Trochilidae	0.0027
Calypte anna	Trochilidae	0.00425
Calypte costae	Trochilidae	0.0031
Calyptocichla serina	Pycnonotidae	0.03875
Calyptomena hosii	Eurylaimidae	0.10025
Calyptomena viridis	Eurylaimidae	0.0597
Calyptomena whiteheadi	Eurylaimidae	0.1565
Calyptophilus frugivorus	Thraupidae	0.0321
Calyptophilus tertius	Thraupidae	0.0492
Calyptorhynchus banksii banksii	Cacatuidae	0.775
Calyptorhynchus banksii macrorhynchus	Cacatuidae	0.74
Calyptorhynchus banksii samueli	Cacatuidae	0.656
Calyptorhynchus baudinii	Cacatuidae	0.62
Calyptorhynchus funereus funereus	Cacatuidae	0.75
Calyptorhynchus funereus xanthonotus	Cacatuidae	0.607
Calyptorhynchus lathami	Cacatuidae	0.437
Calyptorhynchus latirostris	Cacatuidae	0.612
Camarhynchus crassirostris	Emberizidae	0.0355
Camarhynchus heliobates	Emberizidae	0.018
Camarhynchus pallidus	Emberizidae	0.0231
Camarhynchus parvulus	Emberizidae	0.0132
Camarhynchus pauper	Emberizidae	0.016
Camarhynchus psittacula	Emberizidae	0.0187
Camaroptera brachyura	Cisticolidae	0.0093
Camaroptera brachyura brachyura	Cisticolidae	0.01045
Camaroptera brachyura brevicaudata	Cisticolidae	0.012
Camaroptera brachyura erlangeri	Cisticolidae	0.0085
Camaroptera brachyura tincta	Cisticolidae	0.0097
Camaroptera brevicaudata	Cisticolidae	0.0102
Camaroptera chloronota	Cisticolidae	0.0114
Camaroptera harterti	Cisticolidae	0.011
Camaroptera stierlingi	Cisticolidae	0.0131
Camaroptera superciliaris	Cisticolidae	0.0097
Campephaga flava	Campephagidae	0.0323
Campephaga lobata	Campephagidae	0.0331
Campephaga petiti	Campephagidae	0.03135
Campephaga phoenicea	Campephagidae	0.0271
Campephaga quiscalina	Campephagidae	0.0345
Campephilus gayaquilensis	Picidae	0.2415
Campephilus guatemalensis	Picidae	0.242
Campephilus haematogaster	Picidae	0.237
Campephilus leucopogon	Picidae	0.249
Campephilus magellanicus	Picidae	0.324
Campephilus melanoleucos	Picidae	0.256
Campephilus principalis	Picidae	0.516
Campephilus robustus	Picidae	0.2
Campephilus rubricollis	Picidae	0.211
Campethera abingoni	Picidae	0.07
Campethera bennettii	Picidae	0.0701
Campethera cailliautii	Picidae	0.0425
Campethera caroli	Picidae	0.0475
Campethera maculosa	Picidae	0.054
Campethera mombassica	Picidae	0.0605
Campethera nivosa	Picidae	0.0378
Campethera notata	Picidae	0.062
Campethera nubica	Picidae	0.0597
Campethera punctuligera	Picidae	0.0718
Campethera tullbergi	Picidae	0.0505
Campochaera sloetii	Campephagidae	0.041
Camptorhynchus labradorius	Anatidae	0.6735
Camptostoma imberbe	Tyrannidae	0.0074
Camptostoma obsoletum	Tyrannidae	0.0081
Campylopterus cirrochloris	Trochilidae	0.0077
Campylopterus curvipennis	Trochilidae	0.006
Campylopterus duidae	Trochilidae	0.0061
Campylopterus ensipennis	Trochilidae	0.0096
Campylopterus excellens	Trochilidae	0.0088
Campylopterus falcatus	Trochilidae	0.0072
Campylopterus hemileucurus	Trochilidae	0.0098
Campylopterus hyperythrus	Trochilidae	0.0064
Campylopterus largipennis	Trochilidae	0.0083
Campylopterus rufus	Trochilidae	0.00713333
Campylopterus villaviscensio	Trochilidae	0.00745
Campylorhamphus falcularius	Furnariidae	0.0423
Campylorhamphus procurvoides	Furnariidae	0.0335
Campylorhamphus pucherani	Furnariidae	0.0705
Campylorhamphus pusillus	Furnariidae	0.0405
Campylorhamphus trochilirostris	Furnariidae	0.0408
Campylorhynchus albobrunneus	Troglodytidae	0.0329
Campylorhynchus brunneicapillus	Troglodytidae	0.0389
Campylorhynchus chiapensis	Troglodytidae	0.0509
Campylorhynchus fasciatus	Troglodytidae	0.03
Campylorhynchus griseus	Troglodytidae	0.0424
Campylorhynchus gularis	Troglodytidae	0.0301
Campylorhynchus jocosus	Troglodytidae	0.0276
Campylorhynchus megalopterus	Troglodytidae	0.0331
Campylorhynchus nuchalis	Troglodytidae	0.0232
Campylorhynchus rufinucha	Troglodytidae	0.031
Campylorhynchus turdinus	Troglodytidae	0.0326
Campylorhynchus yucatanicus	Troglodytidae	0.0355
Campylorhynchus zonatus	Troglodytidae	0.0346
Canirallus kioloides	Rallidae	0.246
Canirallus oculeus	Rallidae	0.277
Capito auratus auratus	Capitonidae	0.0628
Capito auratus insperatus	Capitonidae	0.0656
Capito auratus punctatus	Capitonidae	0.0606
Capito aurovirens	Capitonidae	0.0562
Capito brunneipectus	Capitonidae	0.0579
Capito dayi	Capitonidae	0.0672
Capito hypoleucus	Capitonidae	0.071
Capito maculicoronatus	Capitonidae	0.05295
Capito niger auratus	Capitonidae	0.0628
Capito niger niger	Capitonidae	0.0534
Capito niger punctatus	Capitonidae	0.0606
Capito quinticolor	Capitonidae	0.06005
Capito squamatus	Capitonidae	0.0593
Capito wallacei	Capitonidae	0.0695
Caprimulgus aegyptius	Caprimulgidae	0.0773
Caprimulgus affinis	Caprimulgidae	0.0587
Caprimulgus anthonyi	Caprimulgidae	0.0359
Caprimulgus arizonae	Caprimulgidae	0.04695
Caprimulgus asiaticus	Caprimulgidae	0.0429
Caprimulgus atripennis	Caprimulgidae	0.061
Caprimulgus badius	Caprimulgidae	0.0598
Caprimulgus batesi	Caprimulgidae	0.1
Caprimulgus binotatus	Caprimulgidae	0.063
Caprimulgus candicans	Caprimulgidae	0.0493
Caprimulgus carolinensis	Caprimulgidae	0.109
Caprimulgus cayennensis	Caprimulgidae	0.0355
Caprimulgus clarus	Caprimulgidae	0.0425
Caprimulgus climacurus	Caprimulgidae	0.0458
Caprimulgus cubanensis	Caprimulgidae	0.0635
Caprimulgus donaldsoni	Caprimulgidae	0.029
Caprimulgus enarratus	Caprimulgidae	0.0528
Caprimulgus europaeus	Caprimulgidae	0.067
Caprimulgus eximius	Caprimulgidae	0.0663
Caprimulgus fossii	Caprimulgidae	0.0583
Caprimulgus fraenatus	Caprimulgidae	0.05995
Caprimulgus indicus	Caprimulgidae	0.09175
Caprimulgus inornatus	Caprimulgidae	0.05035
Caprimulgus longirostris	Caprimulgidae	0.0456
Caprimulgus macrurus	Caprimulgidae	0.0662
Caprimulgus maculicaudus	Caprimulgidae	0.0303
Caprimulgus madagascariensis	Caprimulgidae	0.0411
Caprimulgus mahrattensis	Caprimulgidae	0.057
Caprimulgus manillensis	Caprimulgidae	0.0702
Caprimulgus natalensis	Caprimulgidae	0.0777
Caprimulgus nigrescens	Caprimulgidae	0.0357
Caprimulgus nigriscapularis	Caprimulgidae	0.049
Caprimulgus noctitherus	Caprimulgidae	0.0361
Caprimulgus nubicus torridus	Caprimulgidae	0.0493
Caprimulgus parvulus	Caprimulgidae	0.037
Caprimulgus pectoralis	Caprimulgidae	0.0525
Caprimulgus poliocephalus	Caprimulgidae	0.0418
Caprimulgus ridgwayi	Caprimulgidae	0.048
Caprimulgus ruficollis	Caprimulgidae	0.0685
Caprimulgus rufigena	Caprimulgidae	0.0525
Caprimulgus rufus	Caprimulgidae	0.0859
Caprimulgus ruwenzorii	Caprimulgidae	0.049
Caprimulgus salvini	Caprimulgidae	0.056
Caprimulgus saturatus	Caprimulgidae	0.052
Caprimulgus sericocaudatus	Caprimulgidae	0.0725
Caprimulgus stellatus	Caprimulgidae	0.0582
Caprimulgus tristigma	Caprimulgidae	0.079
Caprimulgus vociferus	Caprimulgidae	0.0534
Caprimulgus whitelyi	Caprimulgidae	0.041
Capsiempis flaveola	Tyrannidae	0.0077
Caracara cheriway	Falconidae	1.031
Caracara plancus	Falconidae	1.348
Cardellina rubrifrons	Parulidae	0.0098
Cardinalis cardinalis	Cardinalidae	0.04265
Cardinalis phoeniceus	Cardinalidae	0.035
Cardinalis sinuatus	Cardinalidae	0.0352
Carduelis ankoberensis	Fringillidae	0.0149
Carduelis atrata	Fringillidae	0.01605
Carduelis atriceps	Fringillidae	0.0135
Carduelis barbata	Fringillidae	0.0155
Carduelis cabaret	Fringillidae	0.01175
Carduelis cannabina	Fringillidae	0.01955
Carduelis carduelis	Fringillidae	0.016
Carduelis chloris	Fringillidae	0.026
Carduelis cucullata	Fringillidae	0.0098
Carduelis dominicensis	Fringillidae	0.0126
Carduelis flammea	Fringillidae	0.0116
Carduelis flavirostris	Fringillidae	0.0164
Carduelis hornemanni exilipes	Fringillidae	0.0127
Carduelis hornemanni hornemanni	Fringillidae	0.0182
Carduelis johannis	Fringillidae	0.0134
Carduelis lawrencei	Fringillidae	0.01095
Carduelis magellanica	Fringillidae	0.0136
Carduelis notata	Fringillidae	0.0109
Carduelis pinus	Fringillidae	0.0127
Carduelis psaltria	Fringillidae	0.0095
Carduelis psaltria witti	Fringillidae	0.0081
Carduelis siemiradzkii	Fringillidae	0.011
Carduelis sinica	Fringillidae	0.019
Carduelis sinica kittlitzi	Fringillidae	0.0182
Carduelis spinescens	Fringillidae	0.0113
Carduelis spinoides	Fringillidae	0.0186
Carduelis spinus	Fringillidae	0.01325
Carduelis tristis	Fringillidae	0.0128
Carduelis uropygialis	Fringillidae	0.014
Carduelis xanthogastra	Fringillidae	0.0127
Carduelis yemenensis	Fringillidae	0.0143
Cariama cristata	Cariamidae	1.4
Carpococcyx radiatus	Cuculidae	0.4975
Carpodacus cassinii	Fringillidae	0.0265
Carpodacus edwardsii	Fringillidae	0.0265
Carpodacus erythrinus	Fringillidae	0.024
Carpodacus mexicanus	Fringillidae	0.0214
Carpodacus nipalensis	Fringillidae	0.0223
Carpodacus pulcherrimus	Fringillidae	0.0192
Carpodacus puniceus	Fringillidae	0.04675
Carpodacus purpureus	Fringillidae	0.0233
Carpodacus rhodochlamys	Fringillidae	0.0335
Carpodacus rhodochrous	Fringillidae	0.017875
Carpodacus rhodopeplus	Fringillidae	0.023
Carpodacus roseus	Fringillidae	0.0286
Carpodacus rubicilla	Fringillidae	0.0432
Carpodacus rubicilloides	Fringillidae	0.04205
Carpodacus synoicus	Fringillidae	0.0208
Carpodacus thura	Fringillidae	0.0314
Carpodacus vinaceus	Fringillidae	0.022425
Carpodectes antoniae	Cotingidae	0.098
Carpodectes hopkei	Cotingidae	0.102
Carpodectes nitidus	Cotingidae	0.1025
Carpornis cucullatus	Cotingidae	0.0742
Carpornis melanocephalus	Cotingidae	0.0642
Carpospiza brachydactyla	Passeridae	0.0223
Caryothraustes canadensis	Cardinalidae	0.0345
Caryothraustes poliogaster	Cardinalidae	0.0418
Casiornis fusca	Tyrannidae	0.0195
Casiornis rufa	Tyrannidae	0.0248
Casuarius bennetti	Casuariidae	35
Casuarius casuarius	Casuariidae	44
Casuarius unappendiculatus	Casuariidae	47.3
Catamblyrhynchus diadema	Thraupidae	0.01415
Catamenia analis	Emberizidae	0.012
Catamenia homochroa	Emberizidae	0.0122
Catamenia inornata	Emberizidae	0.0134
Catharopeza bishopi	Parulidae	0.0151
Cathartes aura meridionalis	Cathartidae	1.43
Cathartes aura ruficollis	Cathartidae	1.22
Cathartes aura septentrionalis	Cathartidae	2.006
Cathartes burrovianus	Cathartidae	0.935
Cathartes melambrotus	Cathartidae	1.373
Catharus aurantiirostris	Turdidae	0.0298
Catharus bicknelli	Turdidae	0.02735
Catharus dryas	Turdidae	0.0377
Catharus frantzii	Turdidae	0.0289
Catharus fuscater	Turdidae	0.0337
Catharus fuscescens	Turdidae	0.0319
Catharus gracilirostris	Turdidae	0.021
Catharus guttatus	Turdidae	0.0301
Catharus mexicanus	Turdidae	0.033
Catharus minimus	Turdidae	0.0316
Catharus occidentalis	Turdidae	0.0262
Catharus ustulatus	Turdidae	0.0303
Catherpes mexicanus	Troglodytidae	0.0127
Catherpes mexicanus conspersus	Troglodytidae	0.0113
Catreus wallichii	Phasianidae	1.44625
Celeus brachyurus badiosus	Picidae	0.0684
Celeus brachyurus phaioceps	Picidae	0.108
Celeus castaneus	Picidae	0.0856
Celeus elegans	Picidae	0.135667
Celeus flavescens	Picidae	0.139
Celeus flavus	Picidae	0.201
Celeus flavus flavus	Picidae	0.108
Celeus grammicus	Picidae	0.07345
Celeus loricatus	Picidae	0.0766
Celeus lugubris	Picidae	0.137
Celeus obrieni	Picidae	0.095
Celeus spectabilis	Picidae	0.114
Celeus torquatus	Picidae	0.134
Celeus undatus	Picidae	0.0645
Centrocercus minimus	Tetraonidae	1.65
Centrocercus urophasianus phaios	Tetraonidae	1.95
Centrocercus urophasianus urophasianus	Tetraonidae	2.4675
Centropus anselli	Cuculidae	0.21
Centropus ateralbus	Cuculidae	0.339
Centropus bengalensis javanensis	Cuculidae	0.1171
Centropus bengalensis sarasinorum	Cuculidae	0.205
Centropus bernsteini	Cuculidae	0.163
Centropus burchellii	Cuculidae	0.182
Centropus cupreicaudus	Cuculidae	0.2855
Centropus goliath	Cuculidae	0.5115
Centropus grillii	Cuculidae	0.1255
Centropus leucogaster	Cuculidae	0.309
Centropus melanops	Cuculidae	0.2215
Centropus menbeki	Cuculidae	0.519
Centropus milo	Cuculidae	0.769
Centropus monachus	Cuculidae	0.204
Centropus phasianinus melanurus	Cuculidae	0.4055
Centropus phasianinus phasianinus	Cuculidae	0.3735
Centropus rectunguis	Cuculidae	0.238
Centropus senegalensis	Cuculidae	0.169
Centropus sinensis	Cuculidae	0.283
Centropus steerii	Cuculidae	0.199
Centropus superciliosus loandae	Cuculidae	0.17
Centropus superciliosus superciliosus	Cuculidae	0.13
Centropus toulou	Cuculidae	0.17
Centropus unirufus	Cuculidae	0.1845
Centropus violaceus	Cuculidae	0.5
Centropus viridis	Cuculidae	0.142
Cephalopterus glabricollis	Cotingidae	0.385
Cephalopterus ornatus	Cotingidae	0.38
Cephalopterus penduliger	Cotingidae	0.338
Cephalopyrus flammiceps	Remizidae	0.007
Cepphus carbo	Alcidae	0.49
Cepphus columba	Alcidae	0.53
Cepphus grylle	Alcidae	0.378
Ceratogymna albotibialis	Bucerotidae	1.131
Ceratogymna atrata	Bucerotidae	1.2035
Ceratogymna brevis	Bucerotidae	1.235
Ceratogymna bucinator	Bucerotidae	0.644
Ceratogymna cylindricus	Bucerotidae	0.921
Ceratogymna elata	Bucerotidae	1.925
Ceratogymna fistulator	Bucerotidae	0.51
Ceratogymna subcylindricus	Bucerotidae	1.2005
Cercococcyx mechowi	Cuculidae	0.0556
Cercococcyx montanus	Cuculidae	0.0582
Cercococcyx olivinus	Cuculidae	0.0659
Cercomacra carbonaria	Thamnophilidae	0.0145
Cercomacra cinerascens	Thamnophilidae	0.0143
Cercomacra ferdinandi	Thamnophilidae	0.015
Cercomacra laeta	Thamnophilidae	0.016
Cercomacra manu	Thamnophilidae	0.01815
Cercomacra melanaria	Thamnophilidae	0.019
Cercomacra nigrescens	Thamnophilidae	0.0165
Cercomacra nigricans	Thamnophilidae	0.0166
Cercomacra serva	Thamnophilidae	0.017
Cercomacra tyrannina	Thamnophilidae	0.0163
Cercomela familiaris	Muscicapidae	0.01945
Cercomela fusca	Muscicapidae	0.0127
Cercomela melanura	Muscicapidae	0.0152
Cercomela schlegelii	Muscicapidae	0.0233
Cercomela scotocerca	Muscicapidae	0.016
Cercomela sinuata	Muscicapidae	0.0207
Cercomela sordida	Muscicapidae	0.021
Cercomela tractrac	Muscicapidae	0.0208
Cercotrichas coryphaeus	Muscicapidae	0.02
Cercotrichas galactotes	Muscicapidae	0.0203
Cercotrichas hartlaubi	Muscicapidae	0.0192
Cercotrichas leucophrys	Muscicapidae	0.0165
Cercotrichas leucosticta	Muscicapidae	0.02545
Cercotrichas minor	Muscicapidae	0.0189
Cercotrichas paena	Muscicapidae	0.0197
Cercotrichas podobe	Muscicapidae	0.0253
Cercotrichas podobe melanoptera	Muscicapidae	0.0226
Cercotrichas quadrivirgata	Muscicapidae	0.0261
Cercotrichas signata	Muscicapidae	0.0382
Cereopsis novaehollandiae	Anatidae	3.98
Cerorhinca monocerata	Alcidae	0.483
Certhia americana	Certhiidae	0.0081
Certhia brachydactyla	Certhiidae	0.0082
Certhia discolor	Certhiidae	0.0104
Certhia familiaris	Certhiidae	0.009
Certhia himalayana	Certhiidae	0.0088
Certhia hodgsoni	Certhiidae	0.0092
Certhia manipurensis	Certhiidae	0.0097
Certhia nipalensis	Certhiidae	0.0111
Certhia tianquanensis	Certhiidae	0.0096
Certhiaxis cinnamomea	Furnariidae	0.0152
Certhiaxis mustelina	Furnariidae	0.015
Certhidea olivacea	Emberizidae	0.0095
Certhilauda benguelensis	Alaudidae	0.044
Certhilauda brevirostris	Alaudidae	0.04275
Certhilauda chuana	Alaudidae	0.0345
Certhilauda curvirostris	Alaudidae	0.0419
Certhilauda semitorquata	Alaudidae	0.042
Certhilauda subcoronata damarensis	Alaudidae	0.04
Certhionyx niger	Meliphagidae	0.0099
Certhionyx pectoralis	Meliphagidae	0.0101
Certhionyx variegatus	Meliphagidae	0.0263
Ceryle alcyon	Alcedinidae	0.148
Ceryle rudis	Alcedinidae	0.0844
Ceryle torquatus	Alcedinidae	0.317
Cettia acanthizoides	Sylviidae	0.00545
Cettia brunnifrons	Sylviidae	0.0075
Cettia canturians	Sylviidae	0.0162
Cettia carolinae	Sylviidae	0.0169
Cettia cetti	Sylviidae	0.01335
Cettia diphone	Sylviidae	0.0135
Cettia diphone restricta	Sylviidae	0.0149
Cettia diphone riukiuensis	Sylviidae	0.0135
Cettia flavolivacea	Sylviidae	0.008
Cettia fortipes	Sylviidae	0.0074
Cettia haddeni	Sylviidae	0.02475
Cettia major	Sylviidae	0.0126
Cettia pallidiceps	Sylviidae	0.0088
Cettia parens	Sylviidae	0.0164
Cettia ruficapilla	Sylviidae	0.0127
Cettia seebohmi	Sylviidae	0.0122
Ceuthmochares aereus	Cuculidae	0.0658
Ceuthmochares australis	Cuculidae	0.062
Ceyx erithacus	Alcedinidae	0.018
Ceyx fallax	Alcedinidae	0.018
Ceyx lepidus	Alcedinidae	0.01405
Ceyx lepidus gentianus	Alcedinidae	0.0276
Ceyx lepidus nigromaxilla	Alcedinidae	0.0194
Ceyx melanurus	Alcedinidae	0.0228
Ceyx rufidorsa	Alcedinidae	0.0179
Chaetocercus berlepschi	Trochildidae	0.002
Chaetocercus bombus	Trochilidae	0.0065
Chaetocercus mulsant	Trochilidae	0.0039
Chaetophila angustipluma	Meliphagidae	0.097
Chaetops aurantius	Chaetopidae	0.05035
Chaetops frenatus	Turdidae	0.05695
Chaetops pycnopygius	Turdidae	0.0283
Chaetorhynchus papuensis	Dicruridae	0.0375
Chaetornis striatus	Sylviidae	0.0315
Chaetura andrei meridionalis	Apodidae	0.0222
Chaetura brachyura	Apodidae	0.0183
Chaetura chapmani chapmani	Apodidae	0.0247
Chaetura chapmani viridipennis	Apodidae	0.023
Chaetura cinereiventris	Apodidae	0.0139
Chaetura egregia	Apodidae	0.0234
Chaetura fumosa	Apodidae	0.0194
Chaetura martinica	Apodidae	0.0125
Chaetura meridionalis	Apodidae	0.0222
Chaetura pelagica	Apodidae	0.0236
Chaetura spinicaudus	Apodidae	0.0152
Chaetura spinicaudus aetherodroma	Apodidae	0.0162
Chaetura vauxi	Apodidae	0.0171
Chaetura viridipennis	Apodidae	0.023
Chaimarrornis leucocephalus	Muscicapidae	0.0304
Chalcomitra amethystina	Nectariniidae	0.0137
Chalcomitra balfouri	Nectariniidae	0.0115
Chalcomitra fuliginosa	Nectariniidae	0.0119
Chalcomitra hunteri	Nectariniidae	0.0118
Chalcomitra rubescens	Nectariniidae	0.01035
Chalcomitra senegalensis gutturalis	Nectariniidae	0.014
Chalcomitra senegalensis lamberti	Nectariniidae	0.0136
Chalcomitra senegalensis senegalensis	Nectariniidae	0.0097
Chalcoparia singalensis	Nectariniidae	0.0076
Chalcophaps indica chrysochlora	Columbidae	0.136
Chalcophaps indica longirostris	Columbidae	0.16
Chalcophaps indica sandwichensis	Columbidae	0.117
Chalcophaps stephani	Columbidae	0.118
Chalcophaps stephani mortoni	Columbidae	0.141
Chalcopsitta atra	Psittacidae	0.195
Chalcopsitta cardinalis	Psittacidae	0.183
Chalcopsitta sintillata	Psittacidae	0.19
Chalcostigma herrani	Trochilidae	0.0058
Chalcostigma heteropogon	Trochildidae	0.0052
Chalcostigma ruficeps	Trochilidae	0.0034
Chalcostigma stanleyi	Trochilidae	0.0058
Chalybura buffonii	Trochilidae	0.0068
Chalybura urochrysia	Trochilidae	0.0064
Chamaea fasciata	Sylviidae	0.01475
Chamaepetes goudotii	Cracidae	0.729
Chamaepetes unicolor	Cracidae	1.135
Chamaeza campanisona	Formicariidae	0.091
Chamaeza meruloides	Formicariidae	0.069
Chamaeza mollissima	Formicariidae	0.072
Chamaeza nobilis	Formicariidae	0.123
Chamaeza ruficauda	Formicariidae	0.0712
Chamaeza turdina	Formicariidae	0.0683
Charadrius alexandrinus	Charadriidae	0.0477333
Charadrius alticola	Charadriidae	0.0449
Charadrius asiaticus	Charadriidae	0.0771
Charadrius bicinctus	Charadriidae	0.0594
Charadrius collaris	Charadriidae	0.0283
Charadrius dubius	Charadriidae	0.0387
Charadrius falklandicus	Charadriidae	0.065
Charadrius hiaticula	Charadriidae	0.06405
Charadrius leschenaultii	Charadriidae	0.0907
Charadrius marginatus	Charadriidae	0.0462
Charadrius melodus	Charadriidae	0.0544
Charadrius modestus	Charadriidae	0.078
Charadrius mongolus	Charadriidae	0.066
Charadrius montanus	Charadriidae	0.09575
Charadrius morinellus	Charadriidae	0.1085
Charadrius nivosus	Charadriidae	0.0423
Charadrius obscurus	Charadriidae	0.146
Charadrius pallidus	Charadriidae	0.0377
Charadrius pecuarius	Charadriidae	0.0357
Charadrius peronii	Charadriidae	0.042
Charadrius placidus	Charadriidae	0.0627
Charadrius ruficapillus	Charadriidae	0.0374
Charadrius sanctaehelenae	Charadriidae	0.0499
Charadrius semipalmatus	Charadriidae	0.04675
Charadrius thoracicus	Charadriidae	0.0115
Charadrius tricollaris	Charadriidae	0.0331
Charadrius veredus	Charadriidae	0.095
Charadrius vociferus	Charadriidae	0.09655
Charadrius wilsonia	Charadriidae	0.0551
Charmosyna josefinae	Psittacidae	0.074
Charmosyna margarethae	Psittacidae	0.04975
Charmosyna meeki	Psittacidae	0.0238
Charmosyna papou	Psittacidae	0.083
Charmosyna placentis	Psittacidae	0.0336
Charmosyna pulchella	Psittacidae	0.0302
Charmosyna rubrigularis	Psittacidae	0.037
Charmosyna rubronotata kordoana	Psittacidae	0.0282
Charmosyna rubronotata rubronotata	Psittacidae	0.0285
Charmosyna wilhelminae	Psittacidae	0.0187
Chasiempis ibidis	Monarchidae	0.01265
Chasiempis sandwichensis ibidis	Monarchidae	0.01265
Chasiempis sandwichensis ridgwayi	Monarchidae	0.0153
Chasiempis sandwichensis sclateri	Monarchidae	0.0129
Chasiempis sclateri	Monarchidae	0.0129
Chauna chavaria	Anhimidae	2.6035
Chauna torquata	Anhimidae	4.4
Chelictinia riocourii	Accipitridae	0.11
Chelidoptera tenebrosa	Bucconidae	0.0359
Chen caerulescens atlanticus	Anatidae	2.6515
Chen caerulescens caerulescens	Anatidae	2.6305
Chen canagica	Anatidae	2.148
Chen rossii	Anatidae	1.636
Chenonetta jubata	Anatidae	0.8075
Cheramoeca leucosternus	Hirundinidae	0.0141
Chersomanes albofasciata	Alaudidae	0.02525
Chersomanes beesleyi	Alaudidae	0.0245
Chersophilus duponti	Alaudidae	0.0394
Chilia melanura	Furnariidae	0.04
Chionis albus	Chionididae	0.677
Chionis minor crozettensis	Chionididae	0.35
Chionis minor minor	Chionididae	0.588
Chiroxiphia boliviana	Pipridae	0.01715
Chiroxiphia caudata	Pipridae	0.0256
Chiroxiphia lanceolata	Pipridae	0.0185
Chiroxiphia linearis	Pipridae	0.01745
Chiroxiphia pareola	Pipridae	0.01685
Chlamydera cerviniventris	Ptilonorhynchidae	0.1565
Chlamydera guttata	Ptilonorhynchidae	0.136
Chlamydera lauterbachi	Ptilonorhynchidae	0.1235
Chlamydera maculata	Ptilonorhynchidae	0.14
Chlamydera nuchalis	Ptilonorhynchidae	0.201
Chlamydotis undulata	Otididae	2
Chlidonias hybrida	Sternidae	0.0839
Chlidonias leucopterus	Sternidae	0.0542
Chlidonias niger	Sternidae	0.0653
Chloebia gouldiae	Estrildidae	0.0138
Chloephaga hybrida	Anatidae	2.2985
Chloephaga melanoptera	Anatidae	2.037
Chloephaga picta	Anatidae	2.8885
Chloephaga poliocephala	Anatidae	2.0245
Chloephaga rubidiceps	Anatidae	2.086
Chloris monguilloti	Fringillidae	0.0155
Chloroceryle aenea	Alcedinidae	0.0138
Chloroceryle amazona	Alcedinidae	0.1265
Chloroceryle americana	Alcedinidae	0.0338667
Chloroceryle inda	Alcedinidae	0.0521
Chlorocharis emiliae	Zosteropidae	0.0139
Chlorochrysa calliparaea	Thraupidae	0.017
Chlorochrysa nitidissima	Thraupidae	0.0186
Chlorochrysa phoenicotis	Thraupidae	0.0218
Chlorocichla falkensteini	Pycnonotidae	0.0317
Chlorocichla flavicollis	Pycnonotidae	0.04875
Chlorocichla flaviventris	Pycnonotidae	0.03945
Chlorocichla laetissima	Pycnonotidae	0.0502
Chlorocichla simplex	Pycnonotidae	0.04645
Chloropeta gracilirostris	Sylviidae	0.0106
Chloropeta natalensis	Sylviidae	0.0117
Chloropeta similis	Sylviidae	0.0111
Chlorophanes spiza	Thraupidae	0.019
Chlorophonia callophrys	Thraupidae	0.0258
Chlorophonia cyanea	Thraupidae	0.014
Chlorophonia flavirostris	Thraupidae	0.011
Chlorophonia occipitalis	Thraupidae	0.0258
Chlorophonia pyrrhophrys	Thraupidae	0.017
Chloropipo flavicapilla	Pipridae	0.0178
Chloropipo holochlora	Pipridae	0.0149
Chloropipo unicolor	Pipridae	0.0155
Chloropipo uniformis	Pipridae	0.0179
Chloropsis aurifrons	Chloropseidae	0.0325
Chloropsis cochinchinensis	Chloropseidae	0.0235833
Chloropsis cyanopogon	Chloropseidae	0.022
Chloropsis flavipennis	Chloropseidae	0.0354
Chloropsis hardwickii	Chloropseidae	0.03225
Chloropsis media	Chloropseidae	0.04
Chloropsis palawanensis	Chloropseidae	0.03035
Chloropsis sonnerati	Chloropseidae	0.0445
Chlorornis riefferii	Thraupidae	0.053
Chlorospingus canigularis	Thraupidae	0.018
Chlorospingus flavigularis	Thraupidae	0.0256
Chlorospingus flavovirens	Thraupidae	0.025
Chlorospingus inornatus	Thraupidae	0.028
Chlorospingus ophthalmicus bolivianus	Thraupidae	0.016
Chlorospingus ophthalmicus flavopectus	Thraupidae	0.02325
Chlorospingus ophthalmicus hiaticolus	Thraupidae	0.022
Chlorospingus ophthalmicus jaqueti	Thraupidae	0.0168
Chlorospingus parvirostris	Thraupidae	0.024
Chlorospingus pileatus	Thraupidae	0.021
Chlorospingus semifuscus	Thraupidae	0.019
Chlorospingus tacarcunae	Thraupidae	0.0189
Chlorostilbon assimilis	Trochilidae	0.003
Chlorostilbon aureoventris	Trochilidae	0.0035
Chlorostilbon auriceps	Trochilidae	0.0022
Chlorostilbon bracei	Trochilidae	0.0028
Chlorostilbon canivetii	Trochilidae	0.0025
Chlorostilbon forficatus	Trochilidae	0.0025
Chlorostilbon gibsoni	Trochildidae	0.0028
Chlorostilbon maugaeus	Trochilidae	0.0031
Chlorostilbon melanorhynchus pumilus	Trochildidae	0.0026
Chlorostilbon mellisugus caribaeus	Trochilidae	0.0026
Chlorostilbon mellisugus gibsoni	Trochilidae	0.0028
Chlorostilbon mellisugus napensis	Trochilidae	0.00255
Chlorostilbon mellisugus pumilus	Trochilidae	0.0026
Chlorostilbon notatus	Trochilidae	0.0042
Chlorostilbon olivaresi	Trochilidae	0.0037
Chlorostilbon poortmani	Trochildidae	0.0033
Chlorostilbon ricordii	Trochilidae	0.0032
Chlorostilbon swainsonii	Trochilidae	0.0043
[truncated: 7,993 more rows]
